# Supplementary material for: Novel 1,2,3-triazolyl phosphine with a pyridyl functionality: synthesis, coinage metal complexes, photophysical studies and Cu(i) catalyzed C–O coupling of phenols with aryl bromides
Source: Royal Society of Chemistry journal article supplement (doi:10.1039/d2dt03791b), 2022-12-30
Supplement: d2dt03791b1.pdf [file d2dt03791b1.pdf]

## Supporting Information

### **Novel 1,2,3-Triazole appended monophosphines with pyridine functionalities: synthesis of coinage metal complexes, photophysical studies and Cu(I) catalyzed C-O coupling of phenols with aryl bromide †**

Sonu Sheokand, Dipanjan Mondal, Basvaraj S. Kote, Latchupatula Radhakrishna and Maravanji S. Balakrishna\*

*Phosphorus Laboratory, Department of Chemistry, Indian Institute of Technology Bombay, Powai, Mumbai 400076, India.*

---

\*Author to whom correspondence should be addressed. E-mail: [krishna@chem.iitb.ac.in](mailto:krishna@chem.iitb.ac.in), [msb\\_krishna@iitb.ac.in](mailto:msb_krishna@iitb.ac.in) (M. S. Balakrishna); Fax: +91-22-5172-3480/2576-7152.

---

## Table of content

|                                                                        |         |
|------------------------------------------------------------------------|---------|
| Crystal structure determination of complexes <b>2-5</b> and <b>7-9</b> | S1      |
| Crystallographic information for complexes <b>2-5</b> and <b>7-9</b>   | S2      |
| Molecular orbitals, TD-DFT and NBO calculations                        | S3-S10  |
| NMR and HRMS spectra of complexes <b>1-9</b>                           | S11-S37 |
| PXRD profiles for <b>2-4</b>                                           | S37-S38 |
| Solid state UV- absorption spectra for <b>1-5</b>                      | S39-S40 |
| NMR spectra of catalytic products                                      | S41-S58 |
| References                                                             | S58-S59 |

### **Crystal structure determination of complexes 2-5 and 7-9.**

Single crystals of all complexes were mounted on a Cryoloop with a drop of paratone oil and positioned in the cold nitrogen stream on a Bruker D8 Venture diffractometer. The data collections were performed at 100 K to 150 K using Bruker D8 Venture diffractometer with a graphite monochromated Mo K $\alpha$  radiation source ( $\lambda = 0.71073 \text{ \AA}$ ) with the  $\omega$ -scan technique. The data were reduced using CrysAlisPro Red 171.41\_64.93a software.<sup>1</sup> The structures were solved using Olex2 1.5<sup>2</sup> with the ShelXT<sup>3</sup> structure solution program using intrinsic phasing and refined with SHELXL<sup>4</sup> refinement package using least-squares minimization. All non-hydrogen atoms were refined anisotropically. Hydrogen atoms were placed in calculated positions and included as riding contributions with isotropic displacement parameters tied to those of the attached non-hydrogen atoms. The given chemical formula and other crystal data do not take into account the unknown solvent molecule(s). The reflections with error/esd more than 10 were excluded in order to avoid problems related to better refinement of the data. The data completeness is more than 99.8% in most of the cases, which is enough to guarantee a very good refinement of data. The details of X-ray structural determinations are given in Tables S1. Crystallographic data for the structures reported in this paper have been deposited with the Cambridge Crystallographic Data Centre as supplementary publication no. CCDC: 2221869–2221872 (for **2-5**) and 2221873–2221875 (for **7-9**).

**Table S1** Crystallographic information of compounds **2-5** and **7-9**

| code                               | <b>2</b>                                                                                         | <b>3</b>                                                                                         | <b>4</b>                                                                                        | <b>5</b>                            | <b>7</b>                                                                              | <b>8</b>                                                                              | <b>9</b>                                                |
|------------------------------------|--------------------------------------------------------------------------------------------------|--------------------------------------------------------------------------------------------------|-------------------------------------------------------------------------------------------------|-------------------------------------|---------------------------------------------------------------------------------------|---------------------------------------------------------------------------------------|---------------------------------------------------------|
| Formula                            | C <sub>50</sub> H <sub>38</sub> Cl <sub>2</sub> Cu <sub>2</sub> N <sub>8</sub><br>P <sub>2</sub> | C <sub>50</sub> H <sub>38</sub> Br <sub>2</sub> Cu <sub>2</sub> N <sub>8</sub><br>P <sub>2</sub> | C <sub>50</sub> H <sub>38</sub> Cu <sub>2</sub> I <sub>2</sub> N <sub>8</sub><br>P <sub>2</sub> | C <sub>37</sub> CuIN <sub>6</sub> P | C <sub>50</sub> H <sub>38</sub> Ag <sub>2</sub> Br <sub>2</sub> N <sub>8</sub> P<br>2 | C <sub>54</sub> H <sub>44</sub> Ag <sub>2</sub> I <sub>2</sub> N <sub>10</sub> P<br>2 | C <sub>25</sub> H <sub>19</sub> AuClN <sub>4</sub><br>P |
| Formula weight                     | 1010.80                                                                                          | 1099.72                                                                                          | 1193.70                                                                                         | 749.84                              | 1188.38                                                                               | 1364.47                                                                               | 638.83                                                  |
| Temperature/K                      | 150.15                                                                                           | 150.15                                                                                           | 150.15                                                                                          | 100.15                              | 150.15                                                                                | 150.15                                                                                | 150.00(10)                                              |
| Crystal system                     | monoclinic                                                                                       | monoclinic                                                                                       | triclinic                                                                                       | monoclinic                          | monoclinic                                                                            | triclinic                                                                             | monoclinic                                              |
| Space group                        | P2 <sub>1</sub> /n                                                                               | P2 <sub>1</sub> /n                                                                               | P-1                                                                                             | P2 <sub>1</sub> /c                  | P2 <sub>1</sub> /n                                                                    | P-1                                                                                   | P2 <sub>1</sub> /c                                      |
| a/Å                                | 9.6601(3)                                                                                        | 9.6861(2)                                                                                        | 10.1156(2)                                                                                      | 12.6389(2)                          | 9.4370(2)                                                                             | 10.22310(10)                                                                          | 10.1388(5)                                              |
| b/Å                                | 13.6102(5)                                                                                       | 13.5067(3)                                                                                       | 10.2713(2)                                                                                      | 16.3194(2)                          | 13.3374(2)                                                                            | 10.86800(10)                                                                          | 9.0469(5)                                               |
| c/Å                                | 17.3381(6)                                                                                       | 17.6907(4)                                                                                       | 13.6838(3)                                                                                      | 15.3635(2)                          | 18.7527(4)                                                                            | 13.3111(2)                                                                            | 25.0966(15)                                             |
| α/°                                | 90                                                                                               | 90                                                                                               | 106.577(2)                                                                                      | 90                                  | 90                                                                                    | 99.4390(10)                                                                           | 90                                                      |
| β/°                                | 96.065(3)                                                                                        | 95.2177(19)                                                                                      | 91.571(2)                                                                                       | 91.7510(10)                         | 93.552(2)                                                                             | 112.0120(10)                                                                          | 101.230(6)                                              |
| γ/°                                | 90                                                                                               | 90                                                                                               | 118.819(2)                                                                                      | 90                                  | 90                                                                                    | 101.4420(10)                                                                          | 90                                                      |
| Volume/Å <sup>3</sup>              | 2266.78(13)                                                                                      | 2304.86(8)                                                                                       | 1170.63(5)                                                                                      | 3167.39(8)                          | 2355.78(8)                                                                            | 1296.81(3)                                                                            | 2257.9(2)                                               |
| Z                                  | 2                                                                                                | 2                                                                                                | 1                                                                                               | 4                                   | 2                                                                                     | 1                                                                                     | 4                                                       |
| ρ <sub>calc</sub> /cm <sup>3</sup> | 1.481                                                                                            | 1.585                                                                                            | 1.693                                                                                           | 1.572                               | 1.675                                                                                 | 1.747                                                                                 | 1.879                                                   |
| μ/mm <sup>-1</sup>                 | 1.173                                                                                            | 2.771                                                                                            | 2.340                                                                                           | 1.751                               | 2.640                                                                                 | 2.055                                                                                 | 6.726                                                   |
| F(000)                             | 1032.0                                                                                           | 1104.0                                                                                           | 588.0                                                                                           | 1444.0                              | 1176.0                                                                                | 668.0                                                                                 | 1232.0                                                  |
| Crystal size/mm <sup>3</sup>       | 0.092 × 0.069 ×<br>0.066                                                                         | 0.098 × 0.079 ×<br>0.075                                                                         | 0.095 × 0.075 ×<br>0.071                                                                        | 0.085 × 0.068<br>× 0.065            | 0.077 × 0.075 ×<br>0.01                                                               | 0.095 × 0.067 ×<br>0.065                                                              | 0.098 × 0.069<br>× 0.066                                |
| 2θ range, deg                      | 4.726 to 67.196                                                                                  | 4.624 to 73.902                                                                                  | 3.168 to 71.638                                                                                 | 3.642 to 50                         | 4.72 to 68.142                                                                        | 4.344 to 60                                                                           | 3.31 to 49.996                                          |
| Total no of reflection             | 66979                                                                                            | 69933                                                                                            | 64162                                                                                           | 59365                               | 68618                                                                                 | 89799                                                                                 | 19634                                                   |
| Independent reflections            | 8226 [R <sub>int</sub> =<br>0.0862]                                                              | 9069 [R <sub>int</sub> =<br>0.0584]                                                              | 8690 [R <sub>int</sub> =<br>0.0429]                                                             | 5574 [R <sub>int</sub> =<br>0.0801] | 8512 [R <sub>int</sub> =<br>0.1526]                                                   | 10573 [R <sub>int</sub> =<br>0.0406]                                                  | 3966 [R <sub>int</sub> =<br>0.0478]                     |
| Goodness-of-fit on F <sup>2</sup>  | 1.039                                                                                            | 1.037                                                                                            | 1.035                                                                                           | 1.066                               | 0.894                                                                                 | 1.052                                                                                 | 1.081                                                   |
| R <sub>1</sub> (all data)          | 0.0491                                                                                           | 0.0388                                                                                           | 0.0345                                                                                          | 0.0505                              | 0.0347                                                                                | 0.0297                                                                                | 0.0317                                                  |
| wR <sub>2</sub> (I > 2σ(I))        | 0.1097                                                                                           | 0.0869                                                                                           | 0.0766                                                                                          | 0.1618                              | 0.0943                                                                                | 0.0629                                                                                | 0.0615                                                  |

## Molecular orbitals, TD-DFT and NBO calculations

All DFT calculations were performed with the Gaussian09 (Rev. D.01) suite of programs.<sup>5</sup> Initially we optimized all of the structures (**2-4**) with different basic sets (using the hybrid density functional B3LYP with TZVP basic sets for C, H, N, P, Cl, Br, and SDD basic sets for Cu and I atoms with the relativistic electron core potential) and the results obtained are given below in Table S2. We found that the optimization calculation revealed the optimized structures of **2** and **3** having almost identical bonding parameters and Cu...Cu' distances with respect to X-ray structures, whereas it is not fit with its X-ray data in case of **4**, especially Cu...Cu' distance (Table S2). Henceforth, we performed all of this calculation by considering crystal coordinates only keeping all the basic sets remain unchanged. Frequency calculations were performed subsequently to confirm the presence of local minima (only positive frequencies). Vertical excitations (100 singlet excited states) were calculated by TD-DFT method. To find out the nature of Cu...Cu' interaction, natural bond order (NBO) analysis is carried out using Gaussian 09. Molecular orbitals were visualised using Chemcraft software with contour value: 0.030.

**Table S2** Selected bond length and bond angles of **2-4** obtained from X-ray diffraction analysis and *DFT* calculation

|                         | <b>2</b> (X = Cl) |            | <b>3</b> (X = Br) |            | <b>4</b> (X = I) |            |
|-------------------------|-------------------|------------|-------------------|------------|------------------|------------|
| <i>Bond lengths</i> (Å) | <i>X-ray</i>      | <i>DFT</i> | <i>X-ray</i>      | <i>DFT</i> | <i>X-ray</i>     | <i>DFT</i> |
| Cu1-P1                  | 2.1786(6)         | 2.23528    | 2.1861(5)         | 2.25420    | 2.2168(5)        | 2.27138    |
| Cu1'-X1                 | 2.4513(6)         | 2.42155    | 2.5535(3)         | 2.53044    | 2.6628(3)        | 2.73623    |
| Cu1-X1                  | 2.2993(6)         | 2.38861    | 2.4026(3)         | 2.50772    | 2.5789(3)        | 2.74395    |
| Cu1-Cu1'                | 3.1039(6)         | 3.08569    | 3.0387(4)         | 3.02069    | 2.6924(5)        | 3.18213    |
| Cu1-N1                  | 2.1046(8)         | 2.16105    | 2.0974(15)        | 2.18626    | 2.0934(16)       | 2.17568    |

---

*Bond angles (°)*

---

|             |            |         |             |         |            |         |
|-------------|------------|---------|-------------|---------|------------|---------|
| Cu1–X1–Cu1' | 81.525(18) | 79.803  | 75.562(10)  | 73.676  | 61.792(9)  | 70.994  |
| X1–Cu1–X1'  | 98.474(18) | 100.197 | 104.439(10) | 106.324 | 118.208(9) | 107.526 |
| P1–Cu1–N1   | 100.64(5)  | 98.028  | 100.43(4)   | 96.648  | 98.48(5)   | 96.935  |
| X1–Cu1–N1   | 105.99(5)  | 106.104 | 108.47(4)   | 106.489 | 110.32(5)  | 109.302 |

---

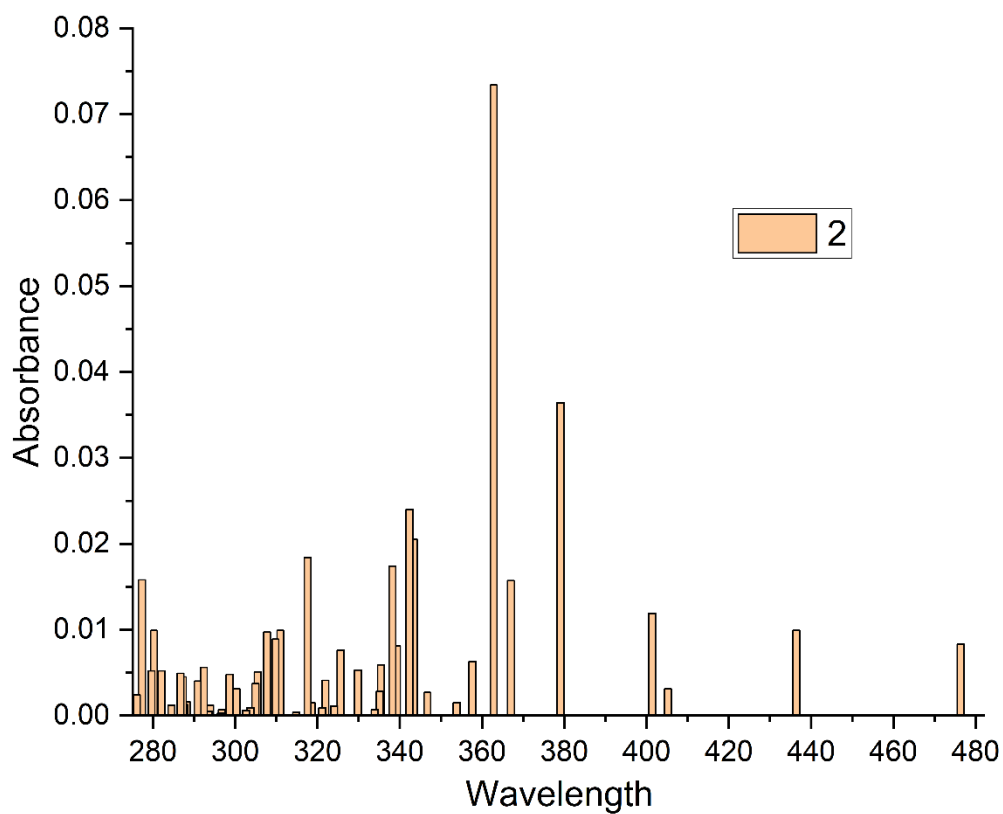

**Fig. S1.** Calculated absorption spectrum of **2** based on the TDDFT method.

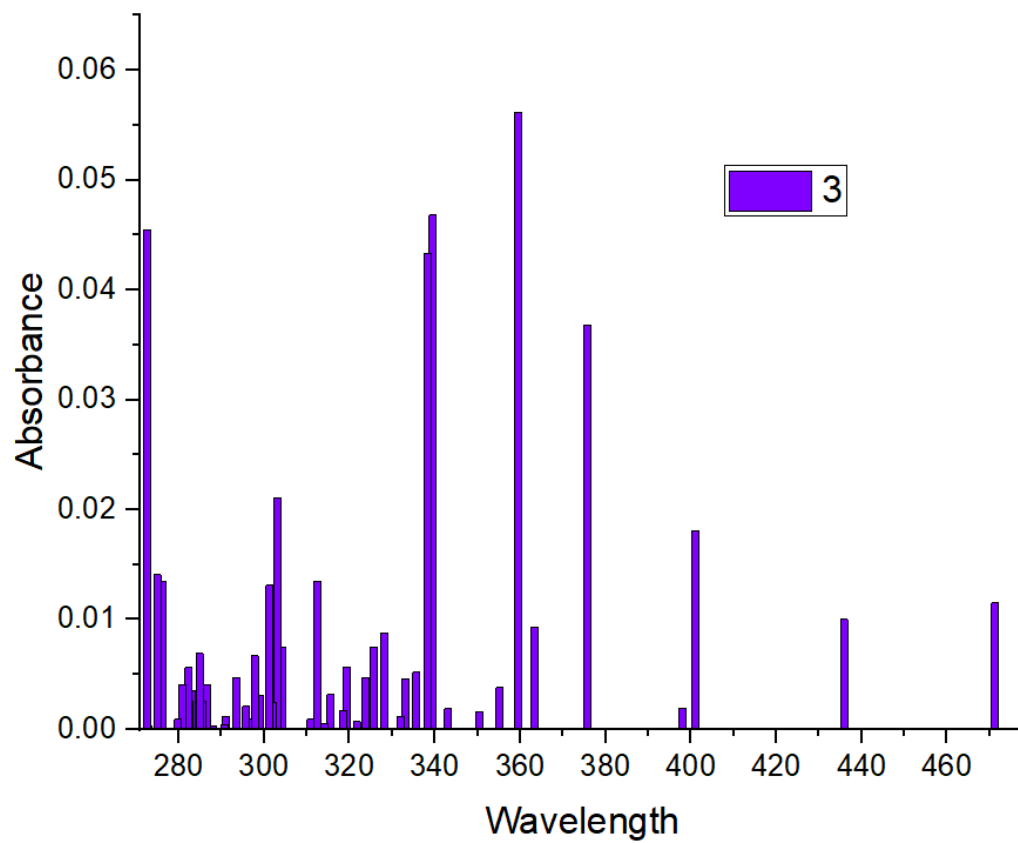

**Fig. S2.** Calculated absorption spectrum of **3** based on the TDDFT method.

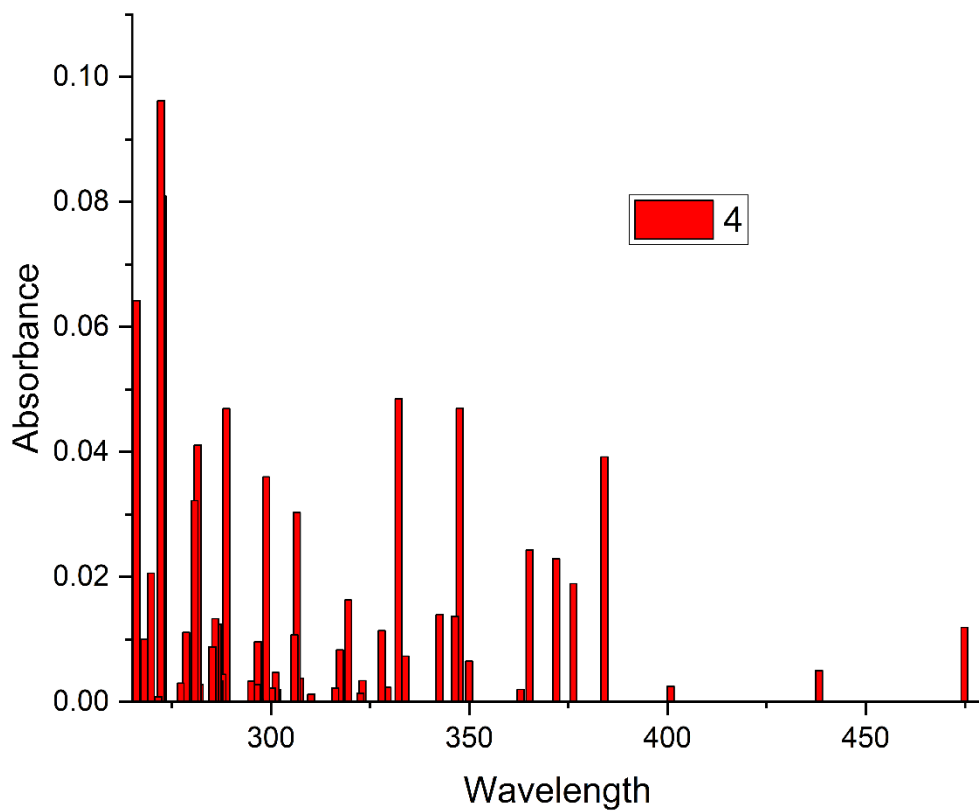

**Fig. S3.** Calculated absorption spectrum of **4** based on the TDDFT method.



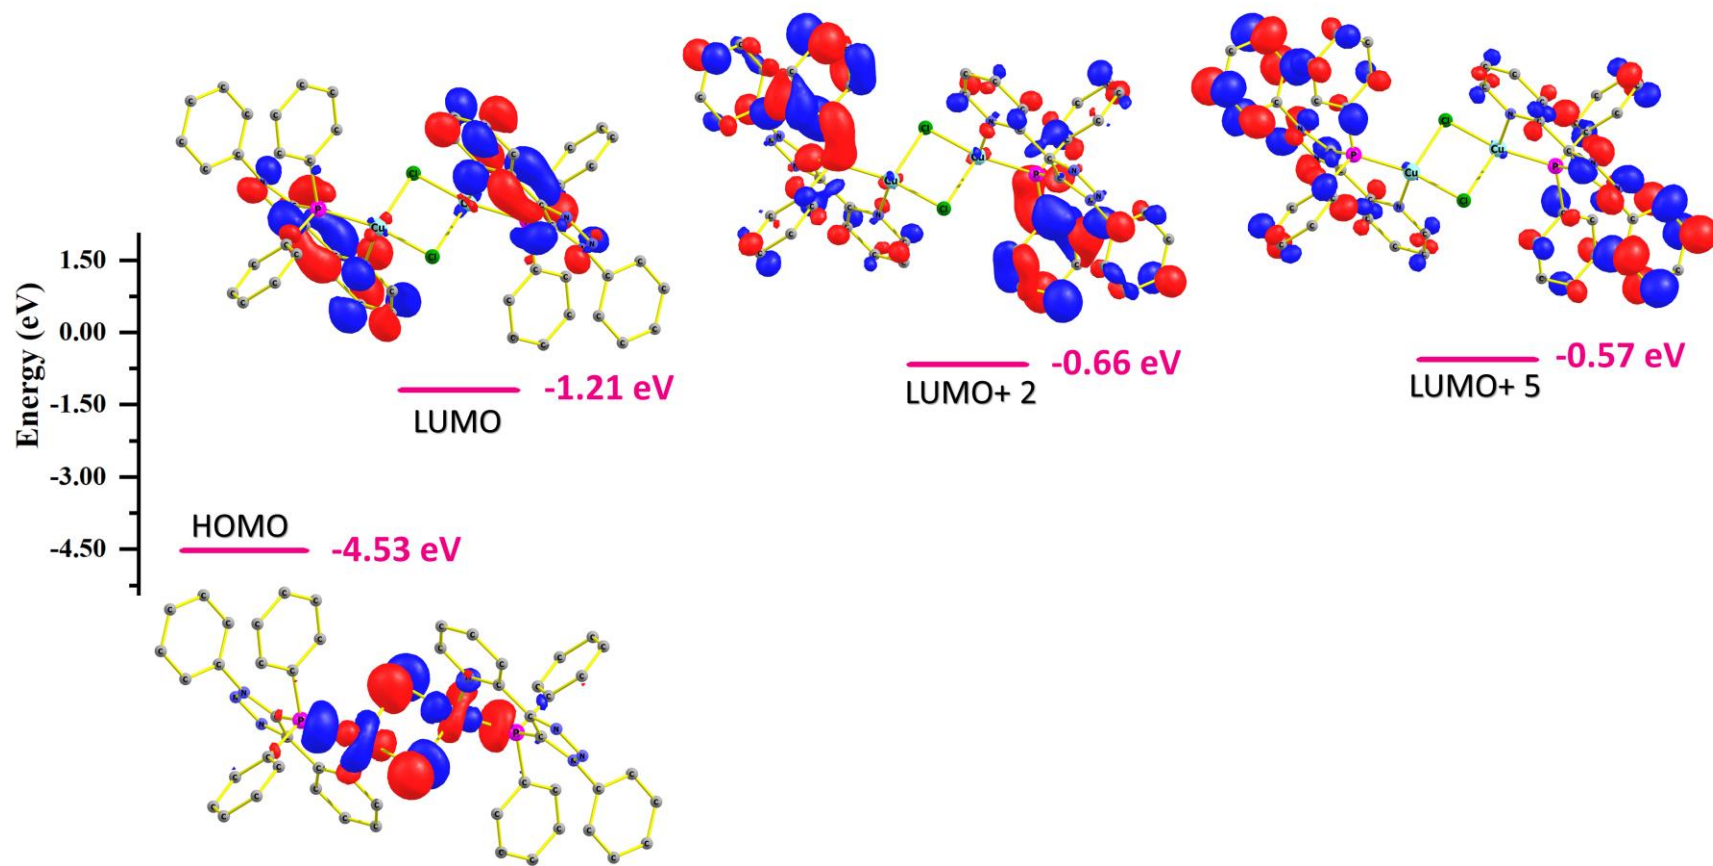

**Fig. S4.** Extended energy level plots for complex 2.

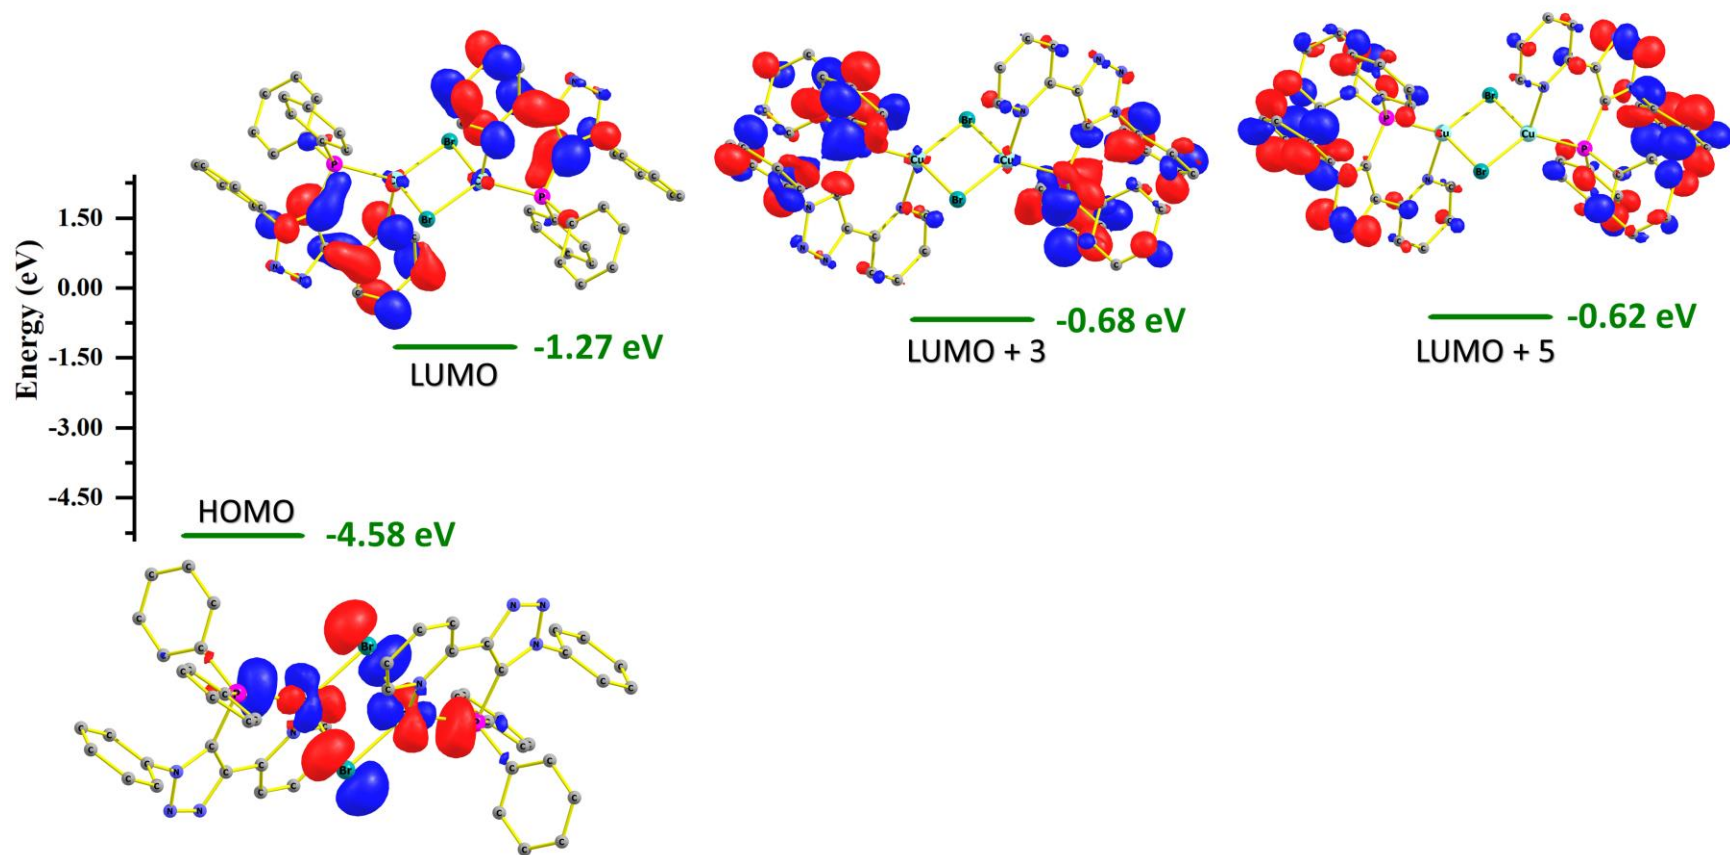

Fig. S5. Extended energy level plots for complex 3.

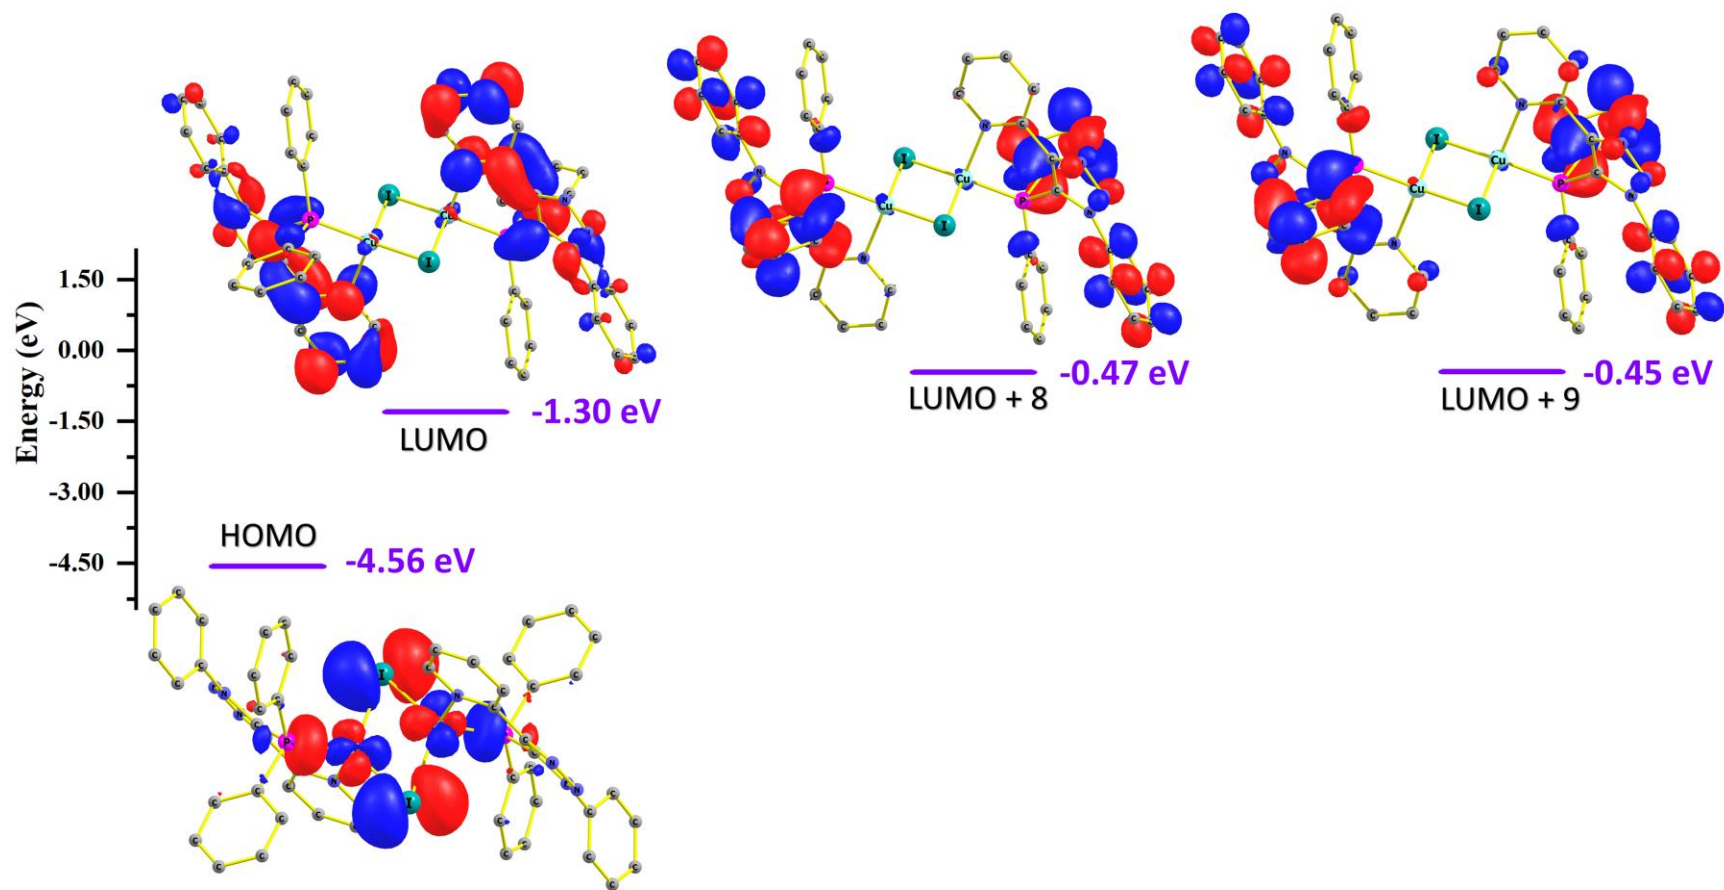

Fig. S6. Extended energy level plots for complex 4.

**Table S3** TD-DFT data for complexes **5-7**

| Comp                          | $\lambda$ (nm) | $E_{ex}$ (eV) | Oscillator strength<br>$f$ | Orbitals involved             |
|-------------------------------|----------------|---------------|----------------------------|-------------------------------|
| <b>2</b>                      | 401            | 3.0890        | 0.0119                     | H-3 $\rightarrow$ L+1 (0.59)  |
|                               |                |               |                            | H-3 $\rightarrow$ L (0.23)    |
|                               | 362            | 3.4171        | 0.0734                     | H-2 $\rightarrow$ L+3 (0.13)  |
|                               |                |               |                            | H-2 $\rightarrow$ L+4 (0.12)  |
|                               |                |               |                            | H $\rightarrow$ L+5 (0.53)    |
|                               | 379            | 3.2704        | 0.0364                     | H $\rightarrow$ L+2 (0.62)    |
| H $\rightarrow$ L+6 (0.24)    |                |               |                            |                               |
| <b>3</b>                      | 400            | 3.0919        | 0.0181                     | H-6 $\rightarrow$ L (0.10)    |
|                               |                |               |                            | H-3 $\rightarrow$ L+1 (0.68)  |
|                               | 375            | 3.2994        | 0.0368                     | H $\rightarrow$ L+2 (0.64)    |
|                               |                |               |                            | H $\rightarrow$ L+6 (0.22)    |
|                               | 359            | 3.4502        | 0.0562                     | H $\rightarrow$ L+5 (0.55)    |
|                               |                |               |                            | H $\rightarrow$ L+6 (0.32)    |
| H $\rightarrow$ L+7 (0.17)    |                |               |                            |                               |
| <b>4</b>                      | 384            | 3.2277        | 0.0392                     | H-3 $\rightarrow$ L (0.69)    |
|                               | 347            | 3.5668        | 0.0470                     | H $\rightarrow$ L+9 (0.56)    |
|                               |                |               |                            | H-1 $\rightarrow$ L+10 (0.13) |
|                               | 272            | 4.5539        | 0.0962                     | H-12 $\rightarrow$ L+1 (0.25) |
|                               |                |               |                            | H-9 $\rightarrow$ L+1 (0.34)  |
| H-4 $\rightarrow$ L+10 (0.42) |                |               |                            |                               |

## NMR and HRMS spectra of complexes 1-9

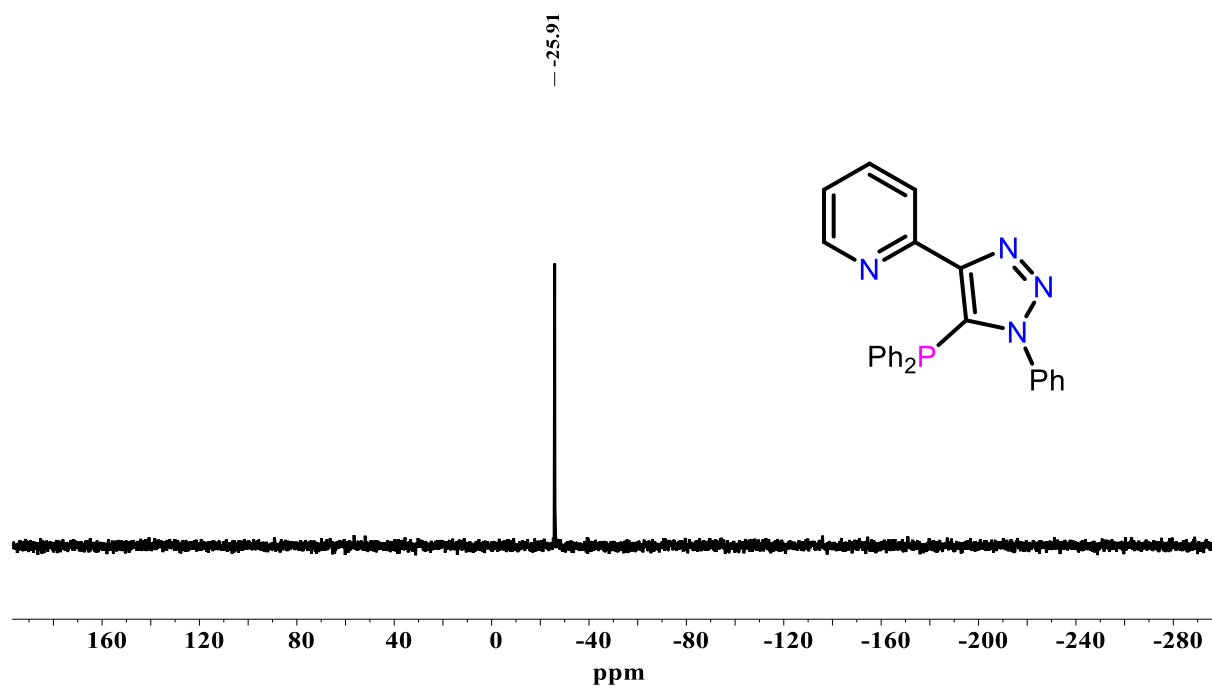

Fig. S7.  $^{31}\text{P}\{^1\text{H}\}$  NMR spectrum of **1** in  $\text{CDCl}_3$  (202 MHz).

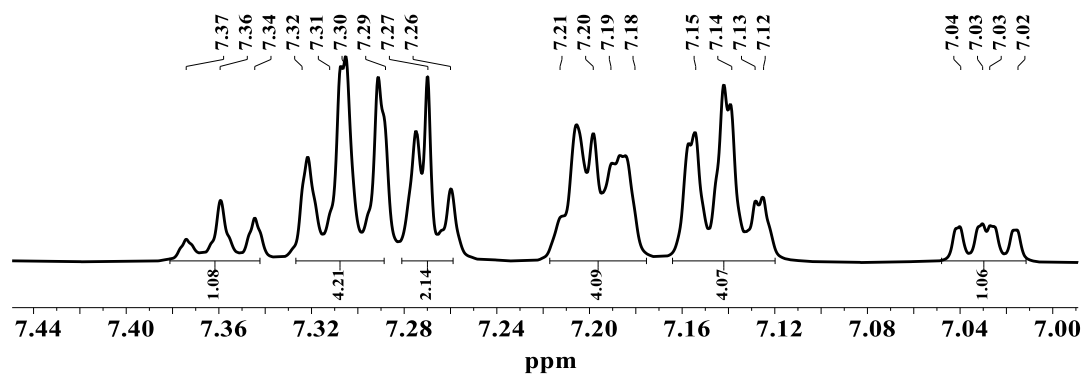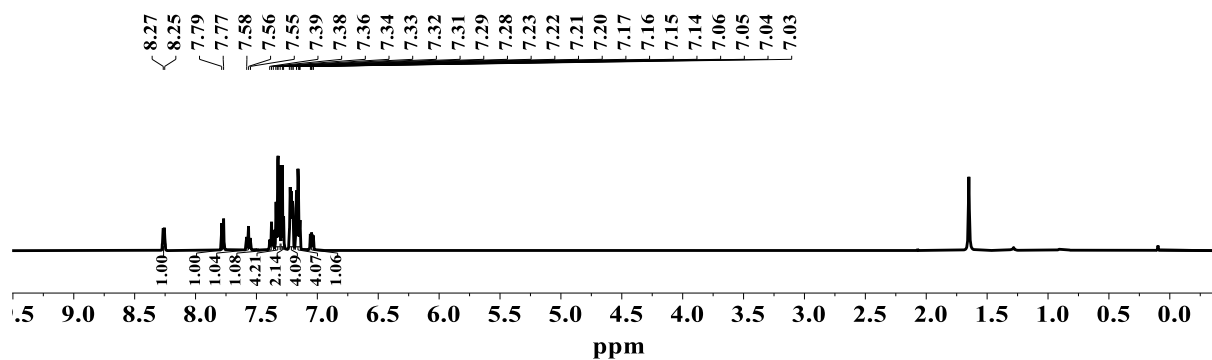

**Fig. S8.**  $^1\text{H}$  NMR spectrum of **1** in  $\text{CDCl}_3$  (500 MHz).

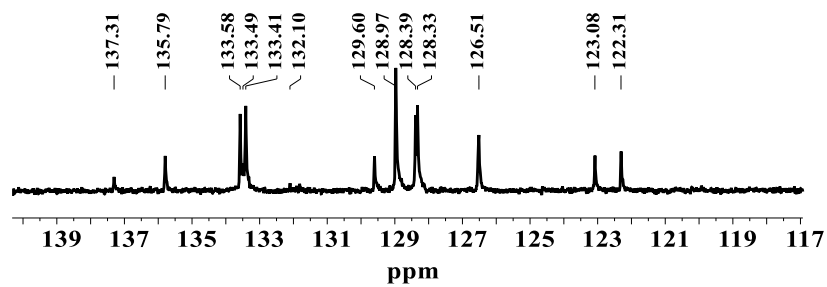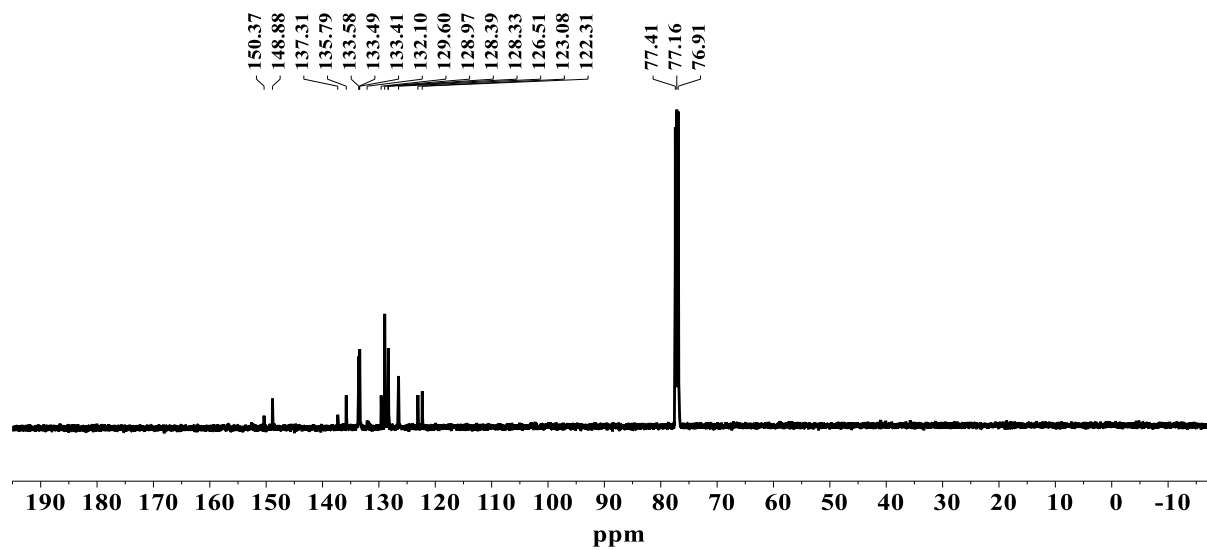

**Fig. S9.**  $^{13}\text{C}\{^1\text{H}\}$  NMR spectrum of **1** in  $\text{CDCl}_3$  (126 MHz).

DEPARTMENT OF CHEMISTRY, I.I.T.(B)

Analysis Info

Analysis Name D:\Data\JAN-2022\MSB-SSS-PN.d  
 Method NaICsl\_pos\_1000-a.m  
 Sample Name MSB-SSS-PN  
 Comment C25H19N4P1

Acquisition Date 1/11/2022 6:47:15 PM

Operator PPI-OUT  
 Instrument maXis impact 282001.00081

Acquisition Parameter

|             |            |                      |          |                  |           |
|-------------|------------|----------------------|----------|------------------|-----------|
| Source Type | ESI        | Ion Polarity         | Positive | Set Nebulizer    | 0.3 Bar   |
| Focus       | Not active | Set Capillary        | 3700 V   | Set Dry Heater   | 180 °C    |
| Scan Begin  | 50 m/z     | Set End Plate Offset | -500 V   | Set Dry Gas      | 4.0 l/min |
| Scan End    | 1000 m/z   | Set Charging Voltage | 2000 V   | Set Divert Valve | Source    |
|             |            | Set Corona           | 0 nA     | Set APCI Heater  | 0 °C      |

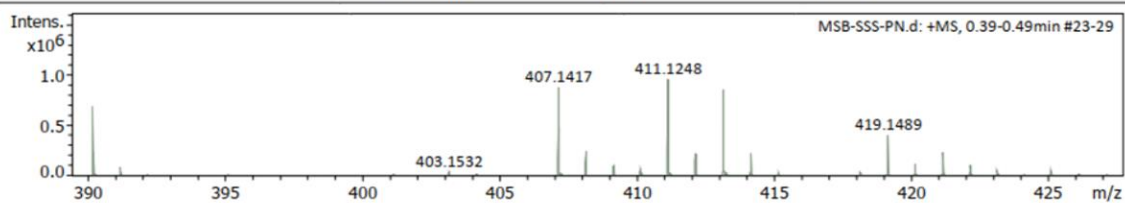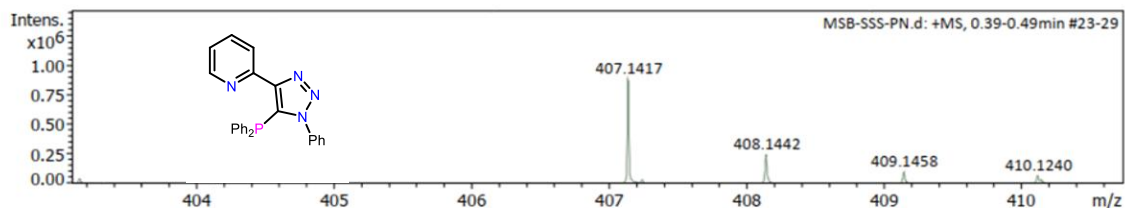

| Meas. m/z | # | Ion Formula | m/z      | err [ppm] | mSigma | # mSigma | Score  | rdb  | e <sup>-</sup> Conf | N-Rule |
|-----------|---|-------------|----------|-----------|--------|----------|--------|------|---------------------|--------|
| 407.1417  | 1 | C25H20N4P   | 407.1420 | 0.7       | 39.9   | 1        | 100.00 | 20.0 | even                | ok     |

Fig. S10. HRMS spectrum of 1.

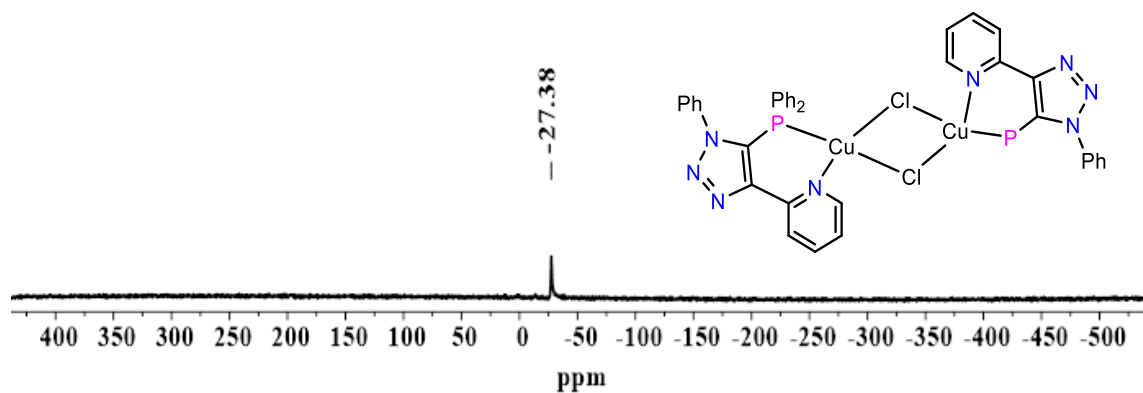

Fig. S11. <sup>31</sup>P{<sup>1</sup>H} NMR spectrum of 2 in DMSO-*d*<sub>6</sub> (162 MHz).

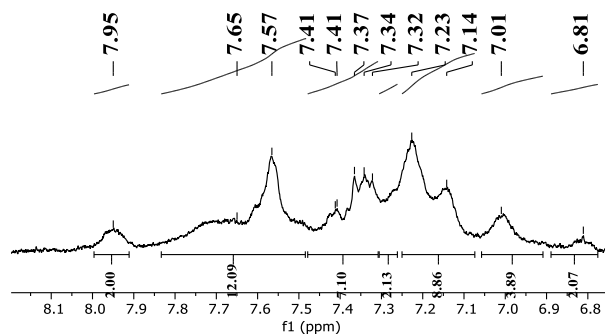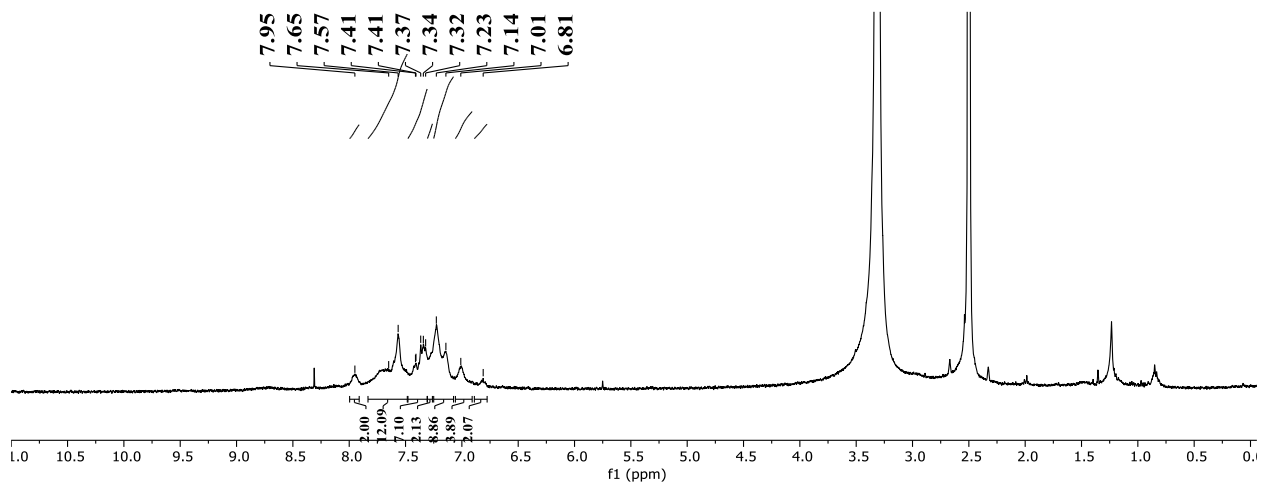

**Fig. S12.**  $^1\text{H}$  NMR spectrum of **2** in  $\text{DMSO-}d_6$  (400 MHz).



DEPARTMENT OF CHEMISTRY, I.I.T.(B)

**Analysis Info**

Analysis Name D:\Data\SEP 21\MSB-SSS-299-A.d  
 Method NaICsl\_pos\_1500hplc.m  
 Sample Name MSB-SSS-299-A  
 Comment C50H38N8Cu2Cl2

Acquisition Date 10/3/2021 8:35:57 PM

Operator SJG-IN  
 Instrument maXis impact 282001.00081

**Acquisition Parameter**

|             |            |                      |          |                  |           |
|-------------|------------|----------------------|----------|------------------|-----------|
| Source Type | ESI        | Ion Polarity         | Positive | Set Nebulizer    | 0.4 Bar   |
| Focus       | Not active | Set Capillary        | 3700 V   | Set Dry Heater   | 200 °C    |
| Scan Begin  | 50 m/z     | Set End Plate Offset | -500 V   | Set Dry Gas      | 6.0 l/min |
| Scan End    | 1500 m/z   | Set Charging Voltage | 2000 V   | Set Divert Valve | Source    |
|             |            | Set Corona           | 0 nA     | Set APCI Heater  | 0 °C      |

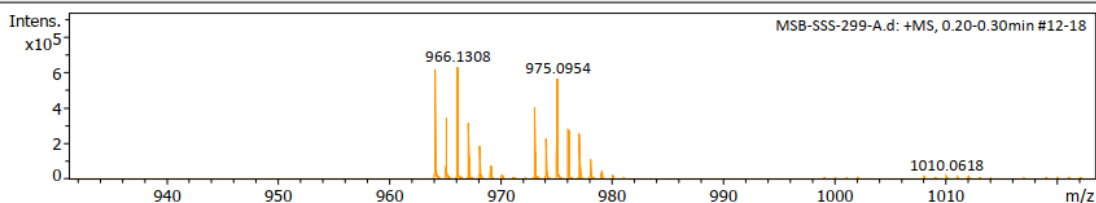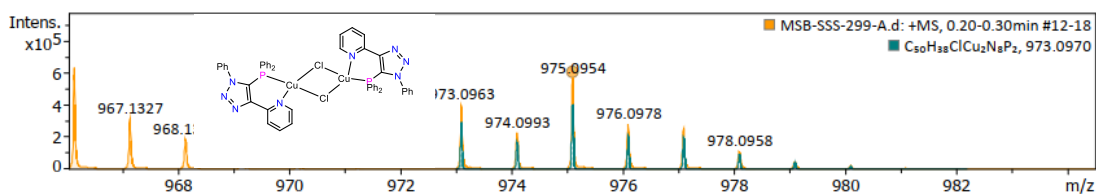

| Meas. m/z | # | Ion Formula     | m/z      | err [ppm] | mSigma | # mSigma | Score  | rdb  | e <sup>-</sup> Conf | N-Rule |
|-----------|---|-----------------|----------|-----------|--------|----------|--------|------|---------------------|--------|
| 975.0954  | 1 | C50H38ClCu2N8P2 | 973.0970 | 0.4       | 25.5   | 1        | 100.00 | 42.0 | even                | ok     |

**Fig. S13.** HRMS spectrum of **2**.

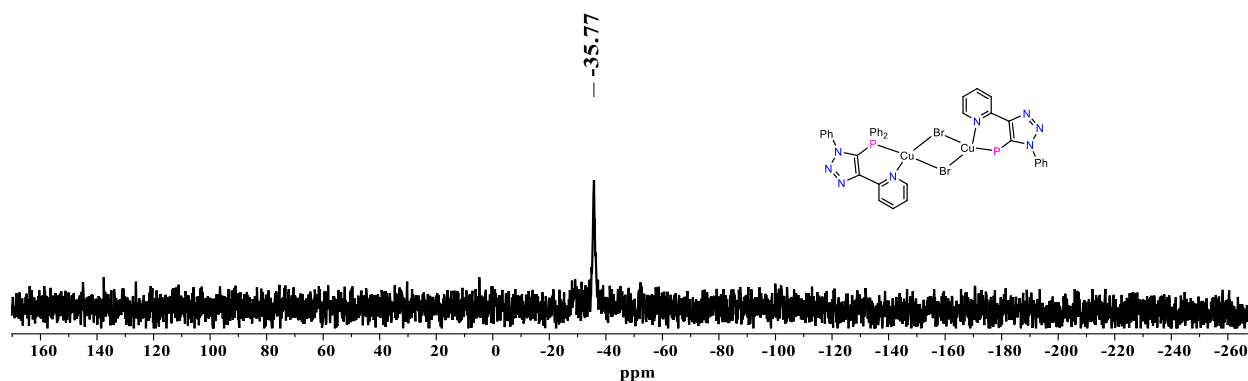

**Fig. S14.**  $^{31}\text{P}\{^1\text{H}\}$  NMR spectrum of **3** in  $\text{DMSO-}d_6$  (162 MHz).

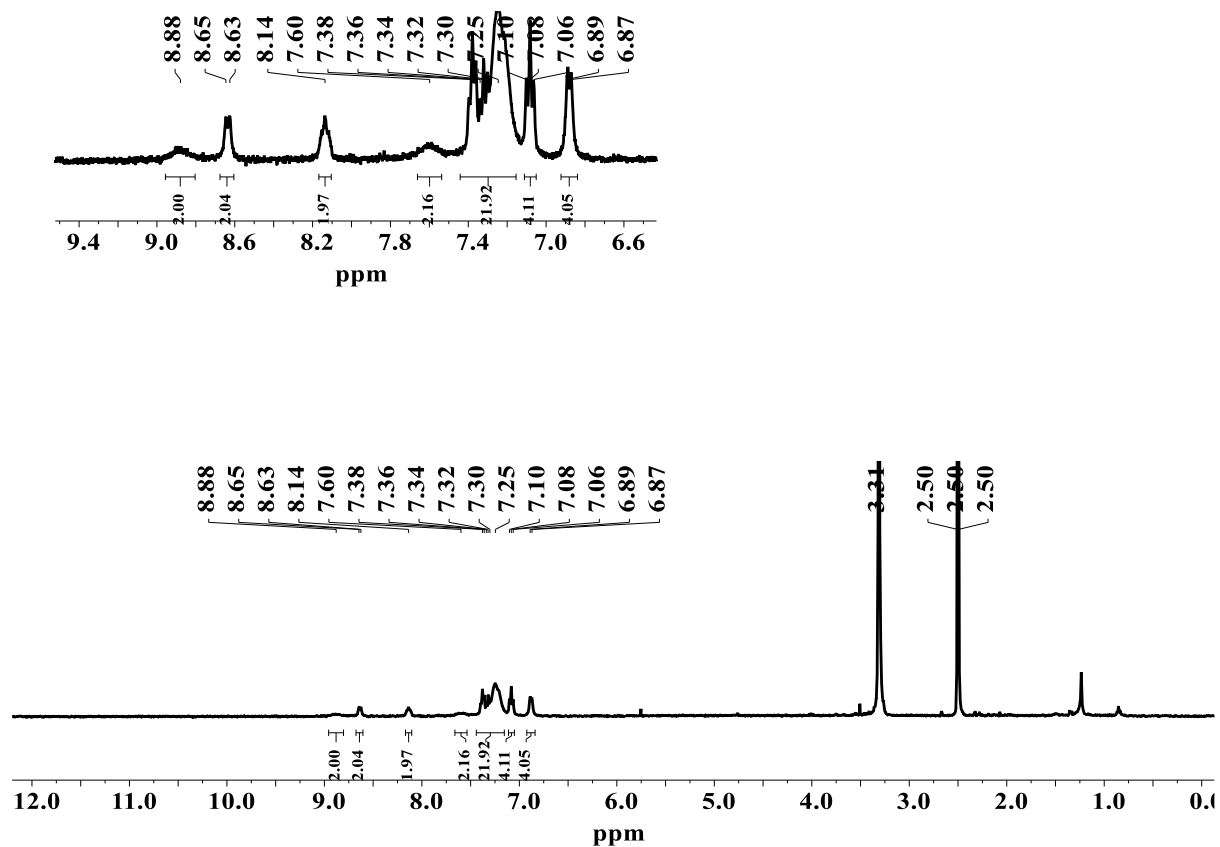

**Fig. S15.**  $^1\text{H}$  NMR spectrum of **3** in  $\text{DMSO-}d_6$  (400 MHz).

DEPARTMENT OF CHEMISTRY, I.I.T.(B)

**Analysis Info**

Analysis Name D:\Data\JAN-2022\MSB-SSS-PN-CuBr.d  
 Method Naformat\_pos\_1000.m  
 Sample Name MSB-SSS-PN-CuBr  
 Comment C50H38N8P2Cu2Br2

Acquisition Date 1/11/2022 7:22:53 PM  
 Operator PPI-OUT  
 Instrument maXis impact 282001.00081

**Acquisition Parameter**

|             |            |                      |          |                  |           |
|-------------|------------|----------------------|----------|------------------|-----------|
| Source Type | ESI        | Ion Polarity         | Positive | Set Nebulizer    | 0.3 Bar   |
| Focus       | Not active | Set Capillary        | 3700 V   | Set Dry Heater   | 180 °C    |
| Scan Begin  | 50 m/z     | Set End Plate Offset | -500 V   | Set Dry Gas      | 4.0 l/min |
| Scan End    | 1500 m/z   | Set Charging Voltage | 2000 V   | Set Divert Valve | Source    |
|             |            | Set Corona           | 0 nA     | Set APCI Heater  | 0 °C      |

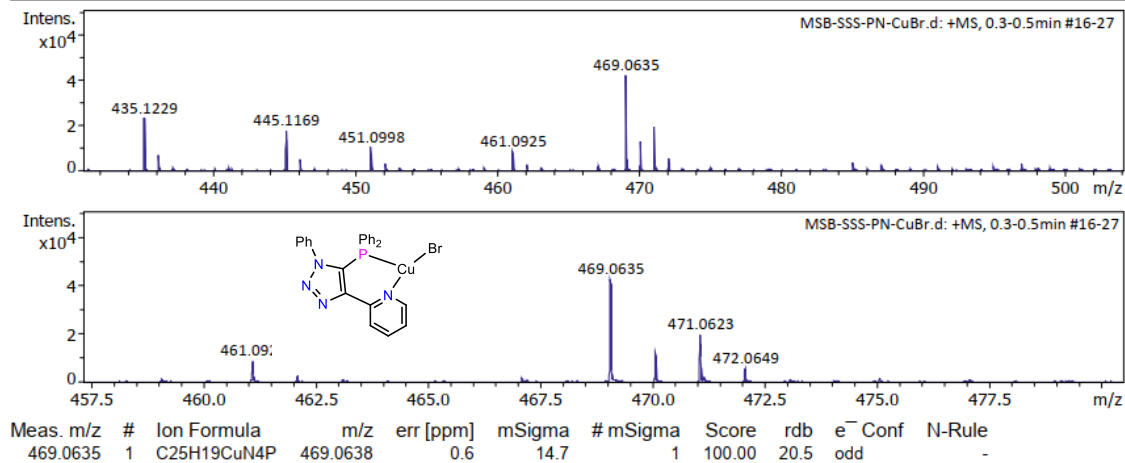

**Fig. S16a.** HRMS spectrum of **3**.

DEPARTMENT OF CHEMISTRY, I.I.T.(B)

Analysis Info

Analysis Name D:\Data\DEC-2022\MSB-SSS-CuBr-C\_1.d  
 Method NaICsl\_pos\_1500hplc.m  
 Sample Name MSB-SSS-CuBr-C  
 Comment C50H38N8P2Cu2Br2

Acquisition Date 12/19/2022 3:51:31 PM  
 Operator SRK-IN  
 Instrument maXis impact 282001.00081

Acquisition Parameter

|             |            |                      |          |                  |           |
|-------------|------------|----------------------|----------|------------------|-----------|
| Source Type | ESI        | Ion Polarity         | Positive | Set Nebulizer    | 0.4 Bar   |
| Focus       | Not active | Set Capillary        | 3700 V   | Set Dry Heater   | 200 °C    |
| Scan Begin  | 50 m/z     | Set End Plate Offset | -500 V   | Set Dry Gas      | 6.5 l/min |
| Scan End    | 1500 m/z   | Set Charging Voltage | 2000 V   | Set Divert Valve | Source    |
|             |            | Set Corona           | 0 nA     | Set APCI Heater  | 0 °C      |

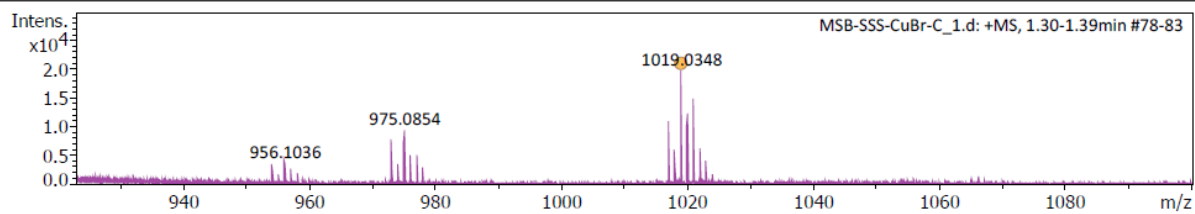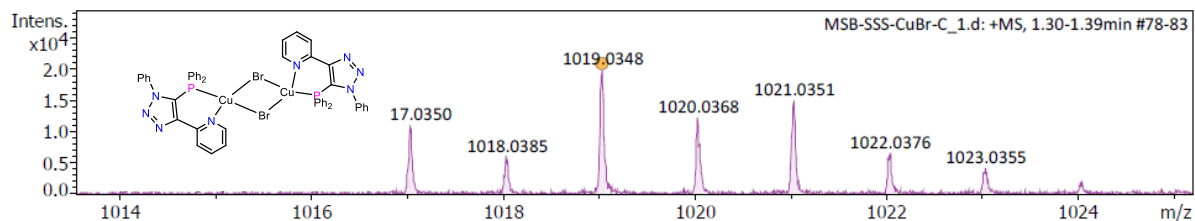

| Meas. m/z | # | Ion Formula     | m/z       | err [ppm] | mSigma | # mSigma | Score  | rdb  | e <sup>-</sup> Conf | N-Rule |
|-----------|---|-----------------|-----------|-----------|--------|----------|--------|------|---------------------|--------|
| 1019.0348 | 1 | C50H38BrCu2N8P2 | 1017.0465 | 10.2      | 49.6   | 1        | 100.00 | 41.0 | even                | ok     |

Fig. S16b. HRMS spectrum of 3.

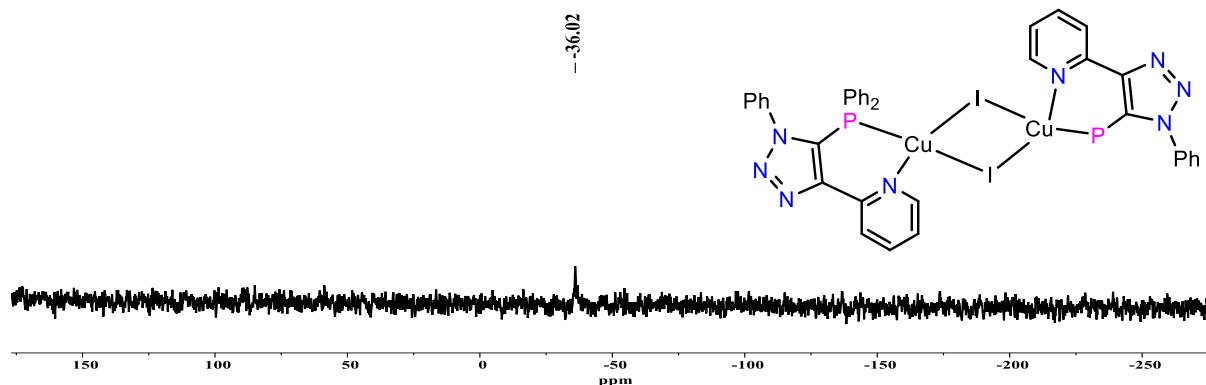

**Fig. S17.**  $^{31}\text{P}\{^1\text{H}\}$  NMR spectrum of **4** in  $\text{DMSO-}d_6$  (162 MHz).

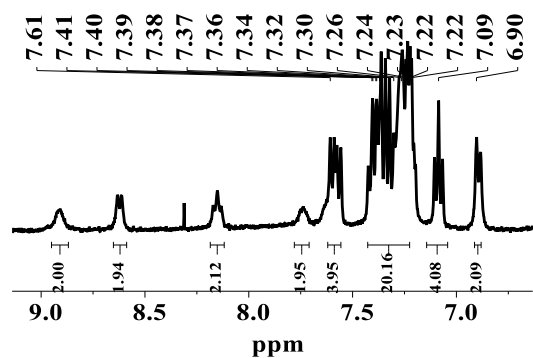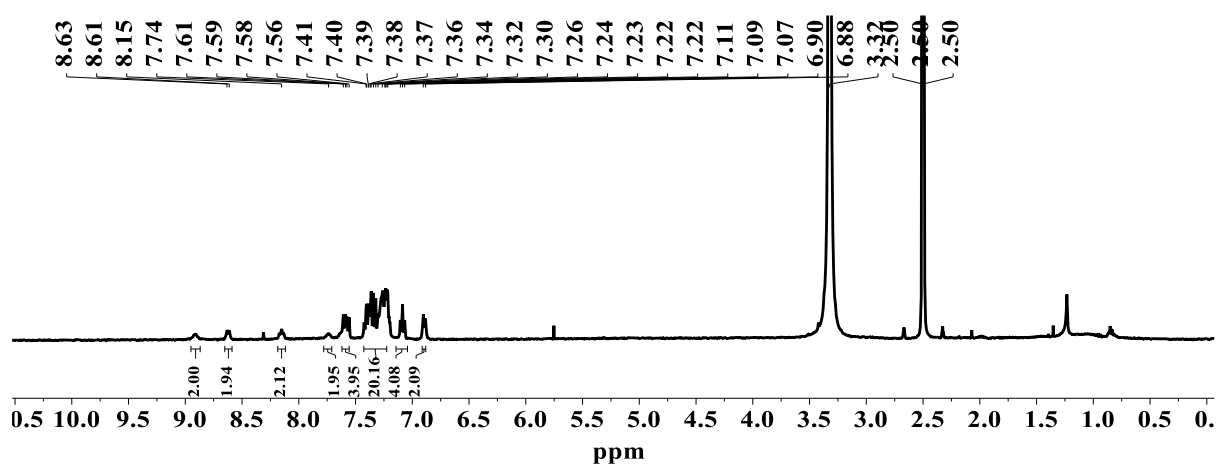

**Fig. S18.**  $^1\text{H}$  NMR spectrum of **4** in  $\text{DMSO-}d_6$  (400 MHz).

DEPARTMENT OF CHEMISTRY, I.I.T.(B)

**Analysis Info**

Analysis Name D:\Data\SEP 21\MSB-SSS-295.d  
 Method NaICsI\_pos\_1000-a.m  
 Sample Name MSB-SSS-295  
 Comment C25H14N4P1Cu11

Acquisition Date 9/28/2021 5:24:35 PM  
 Operator CMRV OUT  
 Instrument maXis impact 282001.00081

**Acquisition Parameter**

|             |            |                      |          |                  |           |
|-------------|------------|----------------------|----------|------------------|-----------|
| Source Type | ESI        | Ion Polarity         | Positive | Set Nebulizer    | 0.3 Bar   |
| Focus       | Not active | Set Capillary        | 3700 V   | Set Dry Heater   | 180 °C    |
| Scan Begin  | 50 m/z     | Set End Plate Offset | -500 V   | Set Dry Gas      | 4.0 l/min |
| Scan End    | 1000 m/z   | Set Charging Voltage | 2000 V   | Set Divert Valve | Source    |
|             |            | Set Corona           | 0 nA     | Set APCI Heater  | 0 °C      |

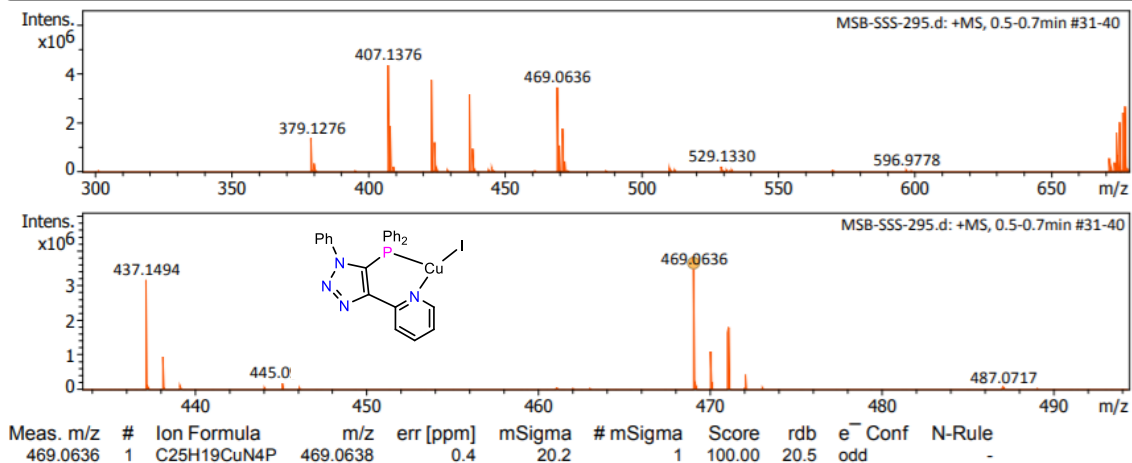

**Fig. S19a.** HRMS spectrum of **4**.

DEPARTMENT OF CHEMISTRY, I.I.T.(B)

Analysis Info

Analysis Name D:\Data\DEC-2022\MSB-SSS-CuI-C.d  
 Method NaICsl\_pos\_1500hplc.m  
 Sample Name MSB-SSS-CUI-C  
 Comment C50H38N8P2Cu2I2

Acquisition Date 12/19/2022 3:12:47 PM

Operator SRK-IN  
 Instrument maXis impact 282001.00081

Acquisition Parameter

|             |            |                      |          |                  |           |
|-------------|------------|----------------------|----------|------------------|-----------|
| Source Type | ESI        | Ion Polarity         | Positive | Set Nebulizer    | 0.4 Bar   |
| Focus       | Not active | Set Capillary        | 3700 V   | Set Dry Heater   | 200 °C    |
| Scan Begin  | 50 m/z     | Set End Plate Offset | -500 V   | Set Dry Gas      | 6.5 l/min |
| Scan End    | 1500 m/z   | Set Charging Voltage | 2000 V   | Set Divert Valve | Source    |
|             |            | Set Corona           | 0 nA     | Set APCI Heater  | 0 °C      |

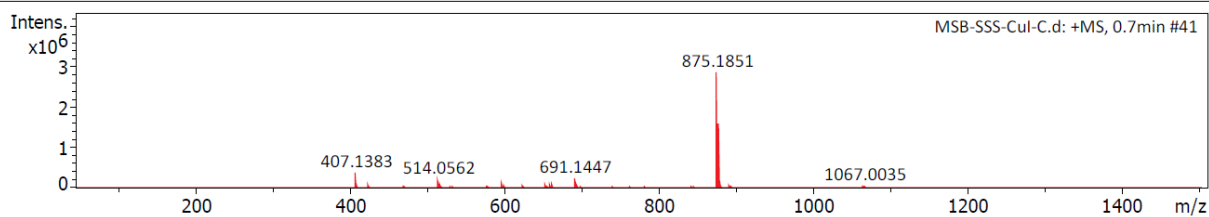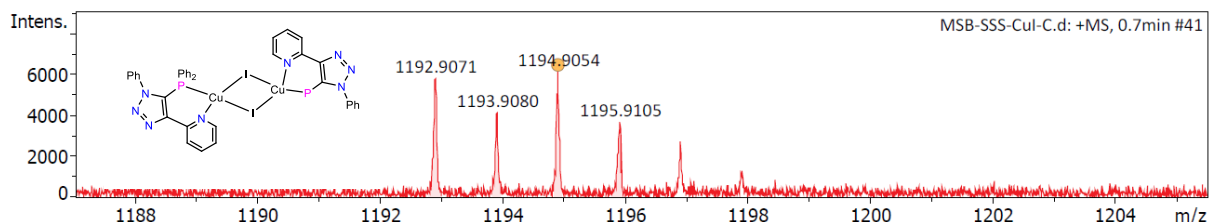

| Meas. m/z | # | Ion Formula     | m/z       | err [ppm] | mSigma | # mSigma | Score | rdb  | e <sup>-</sup> Conf | N-Rule |
|-----------|---|-----------------|-----------|-----------|--------|----------|-------|------|---------------------|--------|
| 1194.9054 | 1 | C50H39Cu2I2N8P2 | 1192.9449 | 32.6      | 147.2  | 1        | 0.00  | 44.0 | even                | ok     |

Fig. S19b. LRMS spectrum of 4

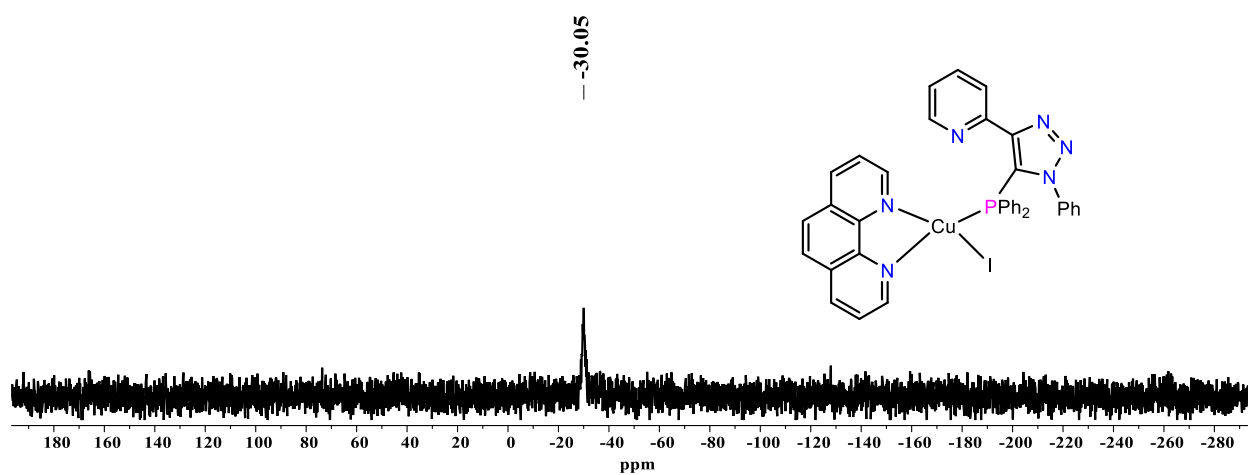

Fig. S20. <sup>31</sup>P{<sup>1</sup>H} NMR spectrum of 5 in DMSO-*d*<sub>6</sub> (202 MHz).

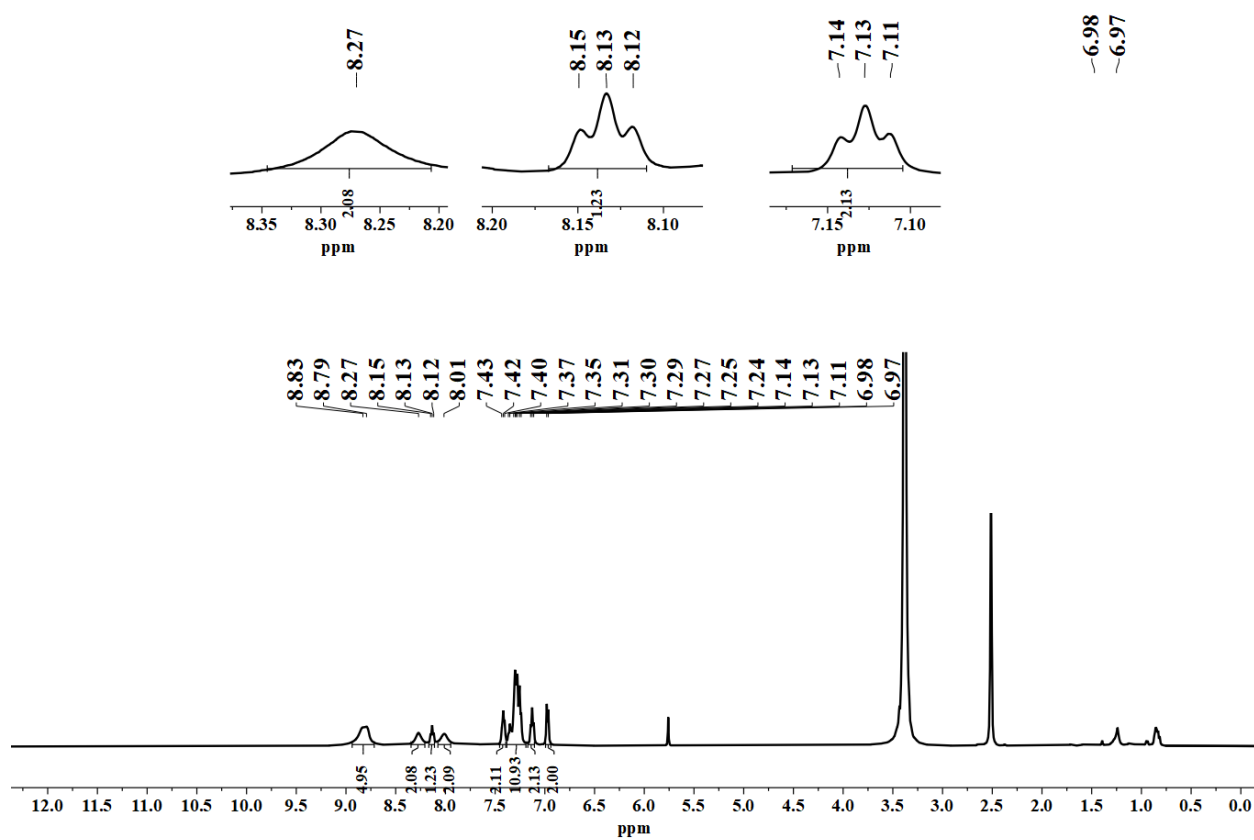

**Fig. S21.**  $^1\text{H}$  NMR spectrum of **5** in  $\text{DMSO-}d_6$  (500 MHz).



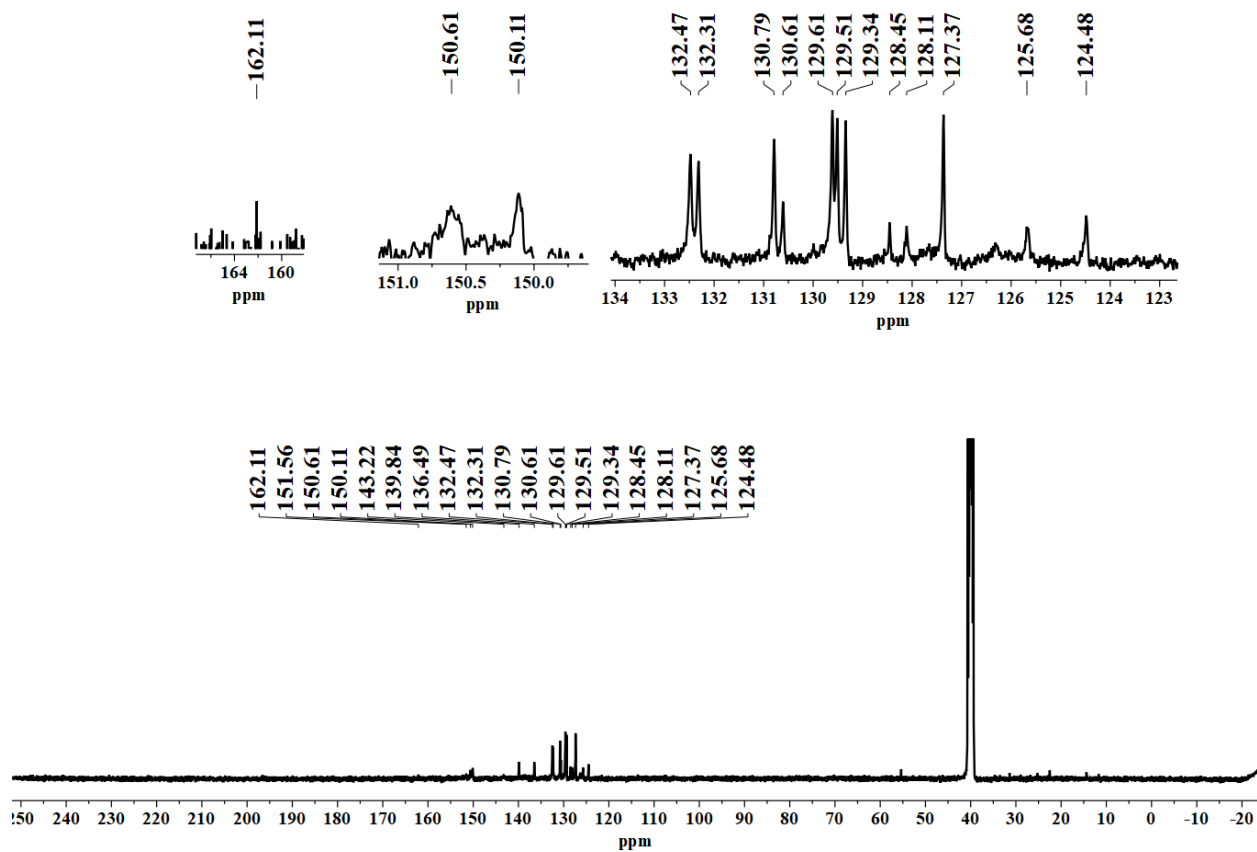

**Fig. S22.**  $^{13}\text{C}\{^1\text{H}\}$  NMR spectrum of **5** in  $\text{DMSO-}d_6$  (101 MHz).

DEPARTMENT OF CHEMISTRY, I.I.T.(B)

**Analysis Info**

Analysis Name D:\Data\MAR-2022\msb-sss-cui-pn-phenthroline.d  
 Method Naformat\_pos\_1000a.m  
 Sample Name msb-sss-cui-pn-phenthroline  
 Comment C37H27N6P1Cu11

Acquisition Date 3/12/2022 2:40:55 PM

Operator ard santanu out  
 Instrument maXis impact 282001.00081

**Acquisition Parameter**

|             |            |                      |          |                  |           |
|-------------|------------|----------------------|----------|------------------|-----------|
| Source Type | ESI        | Ion Polarity         | Positive | Set Nebulizer    | 0.3 Bar   |
| Focus       | Not active | Set Capillary        | 3700 V   | Set Dry Heater   | 180 °C    |
| Scan Begin  | 50 m/z     | Set End Plate Offset | -500 V   | Set Dry Gas      | 4.0 l/min |
| Scan End    | 1000 m/z   | Set Charging Voltage | 2000 V   | Set Divert Valve | Source    |
|             |            | Set Corona           | 0 nA     | Set APCI Heater  | 0 °C      |

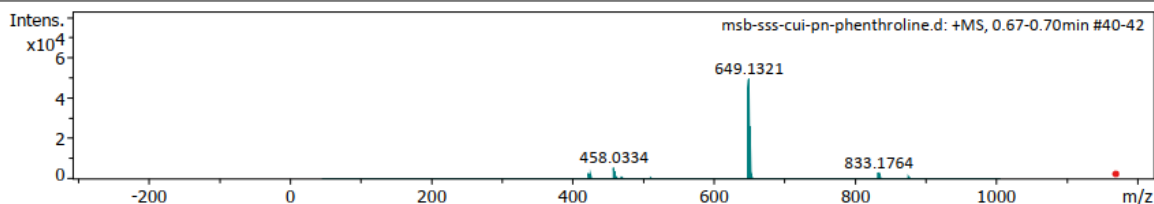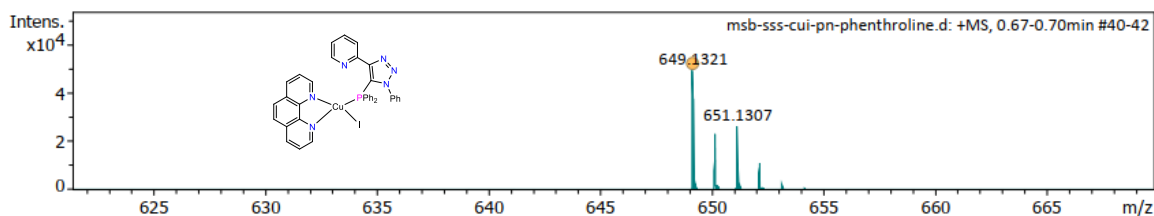

| Meas. m/z | # | Ion Formula | m/z      | err [ppm] | mSigma | # mSigma | Score  | rdb  | e <sup>-</sup> Conf | N-Rule |
|-----------|---|-------------|----------|-----------|--------|----------|--------|------|---------------------|--------|
| 649.1321  | 1 | C37H27CuN6P | 649.1325 | 0.7       | 22.1   | 1        | 100.00 | 29.5 | odd                 | -      |

**Fig. S23.** HRMS spectrum of **5**.

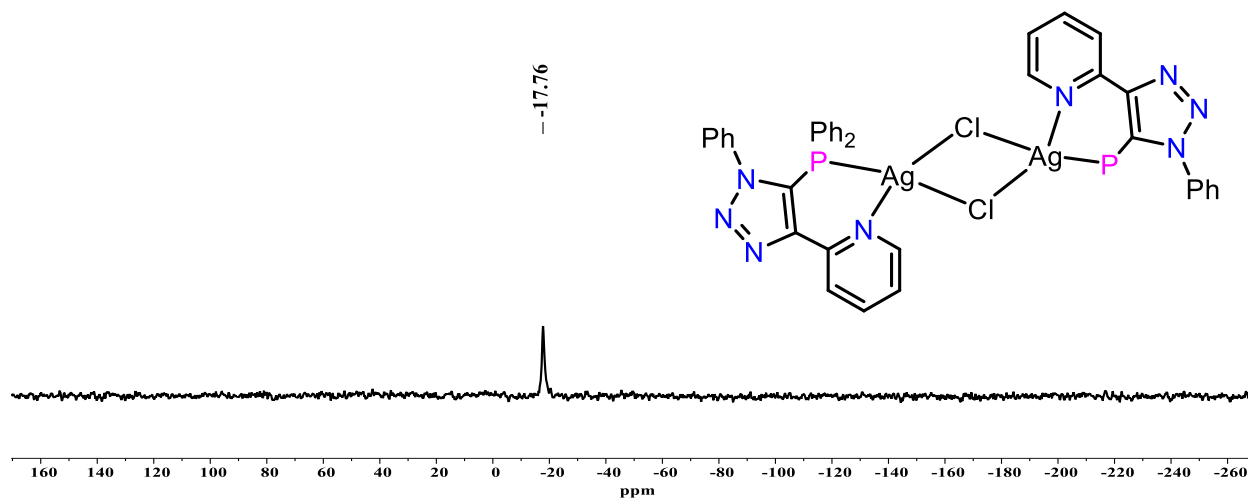

**Fig. S24.**  $^{31}\text{P}\{^1\text{H}\}$  NMR spectrum of **6** in  $\text{CDCl}_3$  (162 MHz).

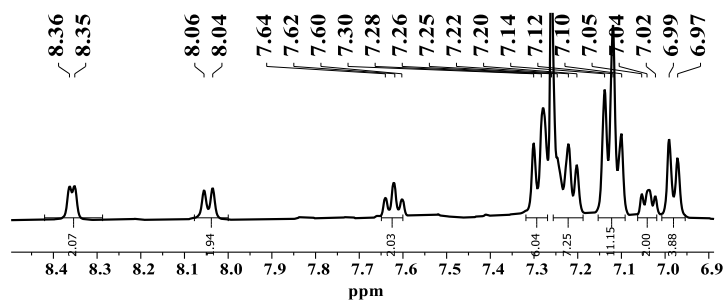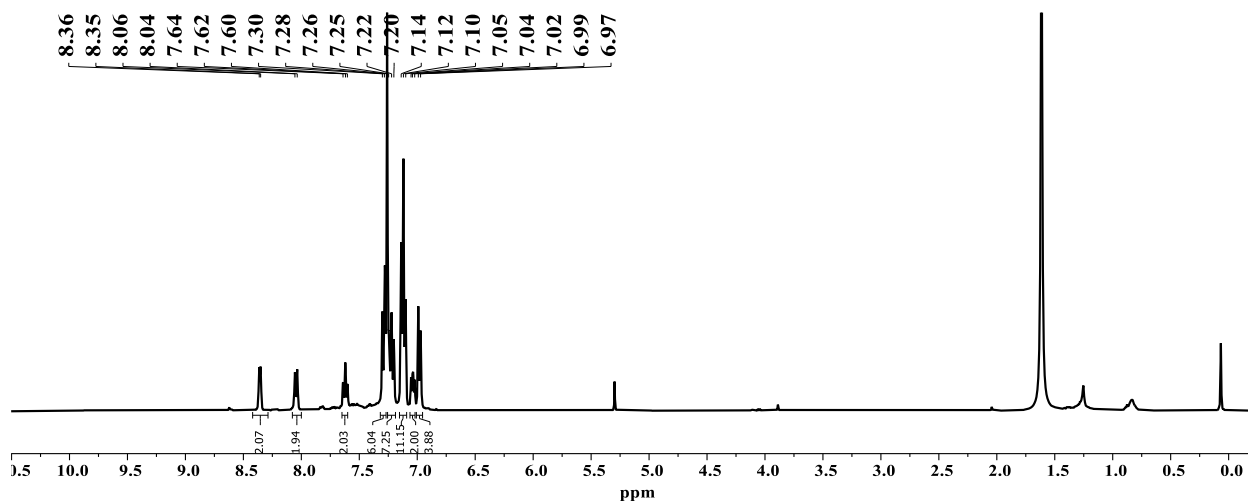

**Fig. S25.**  $^1\text{H}$  NMR spectrum of **6** in  $\text{CDCl}_3$  (400 MHz).

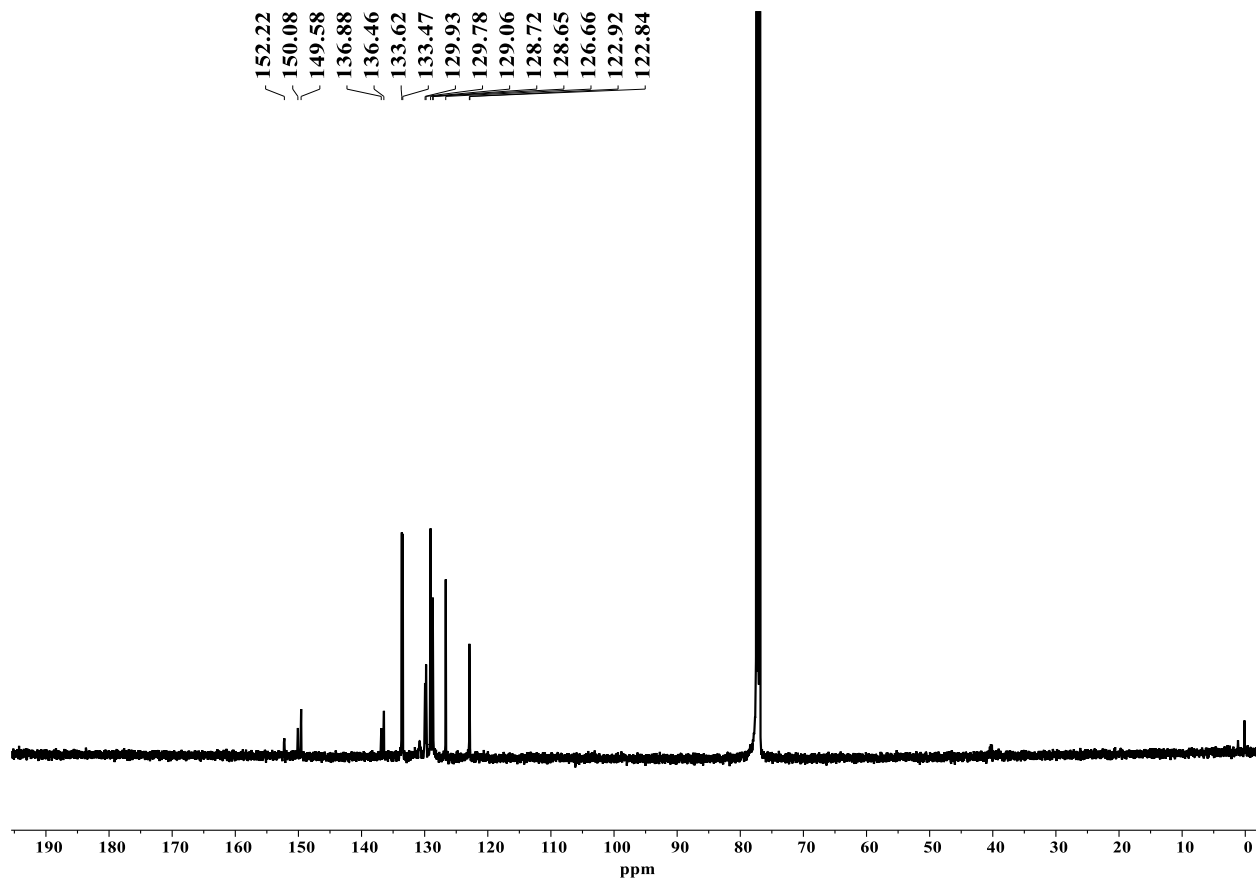

**Fig. S26.**  $^{13}\text{C}\{^1\text{H}\}$  NMR spectrum of **6** in  $\text{CDCl}_3$  (100 MHz).

DEPARTMENT OF CHEMISTRY, I.I.T.(B)

Analysis Info

Analysis Name D:\Data\JAN-2022\M5B-SSS-PN-AgCl.d  
 Method Naformat\_pos\_1000a.m  
 Sample Name MSB-SSS-PN-AgCl  
 Comment C50H38N8P2Ag2Cl2

Acquisition Date 1/28/2022 10:01:48 AM

Operator sjg-OUT  
 Instrument maXis impact 282001.00081

Acquisition Parameter

|             |            |                      |          |                  |           |
|-------------|------------|----------------------|----------|------------------|-----------|
| Source Type | ESI        | Ion Polarity         | Positive | Set Nebulizer    | 0.3 Bar   |
| Focus       | Not active | Set Capillary        | 3700 V   | Set Dry Heater   | 180 °C    |
| Scan Begin  | 50 m/z     | Set End Plate Offset | -500 V   | Set Dry Gas      | 4.0 l/min |
| Scan End    | 600 m/z    | Set Charging Voltage | 2000 V   | Set Divert Valve | Source    |
|             |            | Set Corona           | 0 nA     | Set APCI Heater  | 0 °C      |

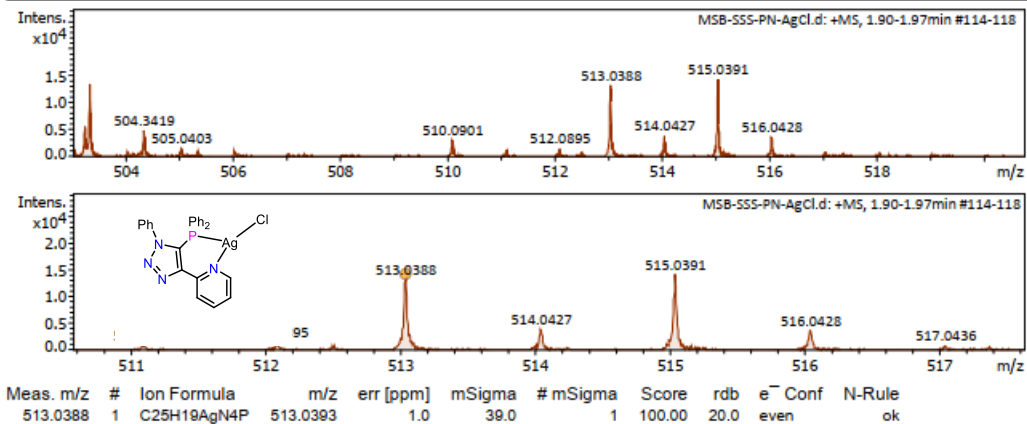

Fig. S27a. HRMS spectrum of 6.

DEPARTMENT OF CHEMISTRY, I.I.T.(B)

**Analysis Info**

Analysis Name D:\Data\DEC-2022\MSB-SSS-AGCI-B.d  
 Method Naformat\_pos\_1500A.m  
 Sample Name MSB-SSS-AGCI-B  
 Comment C50H38N8P2Ag2Cl2

Acquisition Date 12/19/2022 2:46:32 PM

Operator SRK-IN  
 Instrument maXis impact 282001.00081

**Acquisition Parameter**

|             |            |                      |          |                  |           |
|-------------|------------|----------------------|----------|------------------|-----------|
| Source Type | ESI        | Ion Polarity         | Positive | Set Nebulizer    | 0.3 Bar   |
| Focus       | Not active | Set Capillary        | 3700 V   | Set Dry Heater   | 180 °C    |
| Scan Begin  | 50 m/z     | Set End Plate Offset | -500 V   | Set Dry Gas      | 4.0 l/min |
| Scan End    | 1500 m/z   | Set Charging Voltage | 2000 V   | Set Divert Valve | Source    |
|             |            | Set Corona           | 0 nA     | Set APCI Heater  | 0 °C      |

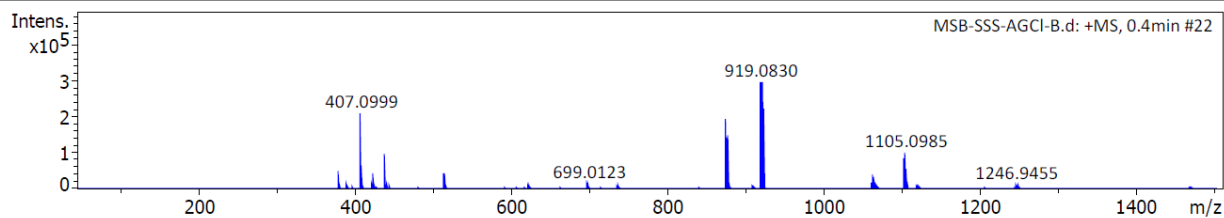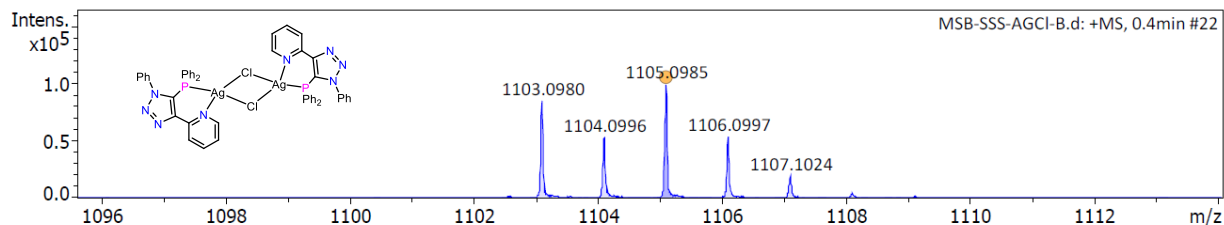

| Meas. m/z | # | Ion Formula        | m/z       | err [ppm] | mSigma | # mSigma | Score  | rdb  | e <sup>-</sup> Conf | N-Rule |
|-----------|---|--------------------|-----------|-----------|--------|----------|--------|------|---------------------|--------|
| 1105.0985 | 1 | C50H38Ag2Cl2LiN8P2 | 1103.0328 | -60.0     | 344.5  | 3        | 100.00 | 43.0 | even                | ok     |

**Fig. S27b.** LRMS spectrum of **6**.

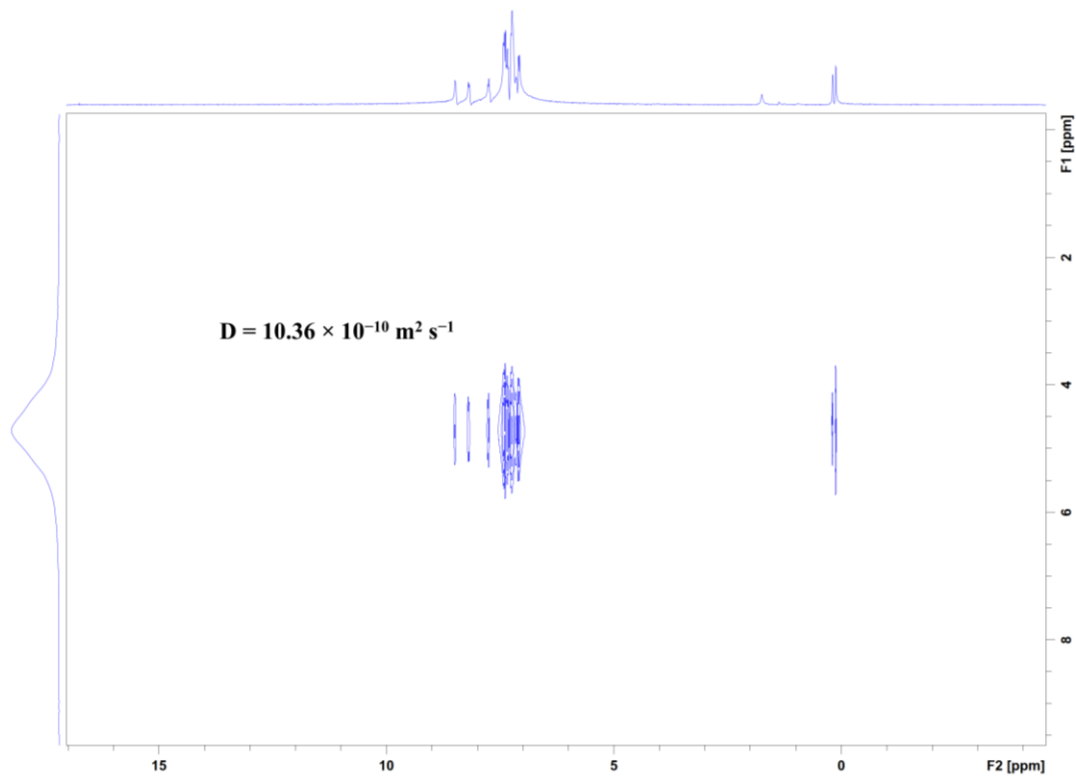

**Fig. S28.** DOSY  $^1\text{H}$  NMR spectrum of complex **6** in  $\text{CDCl}_3$  at  $25\text{ }^\circ\text{C}$  with the calculated diffusion coefficient.

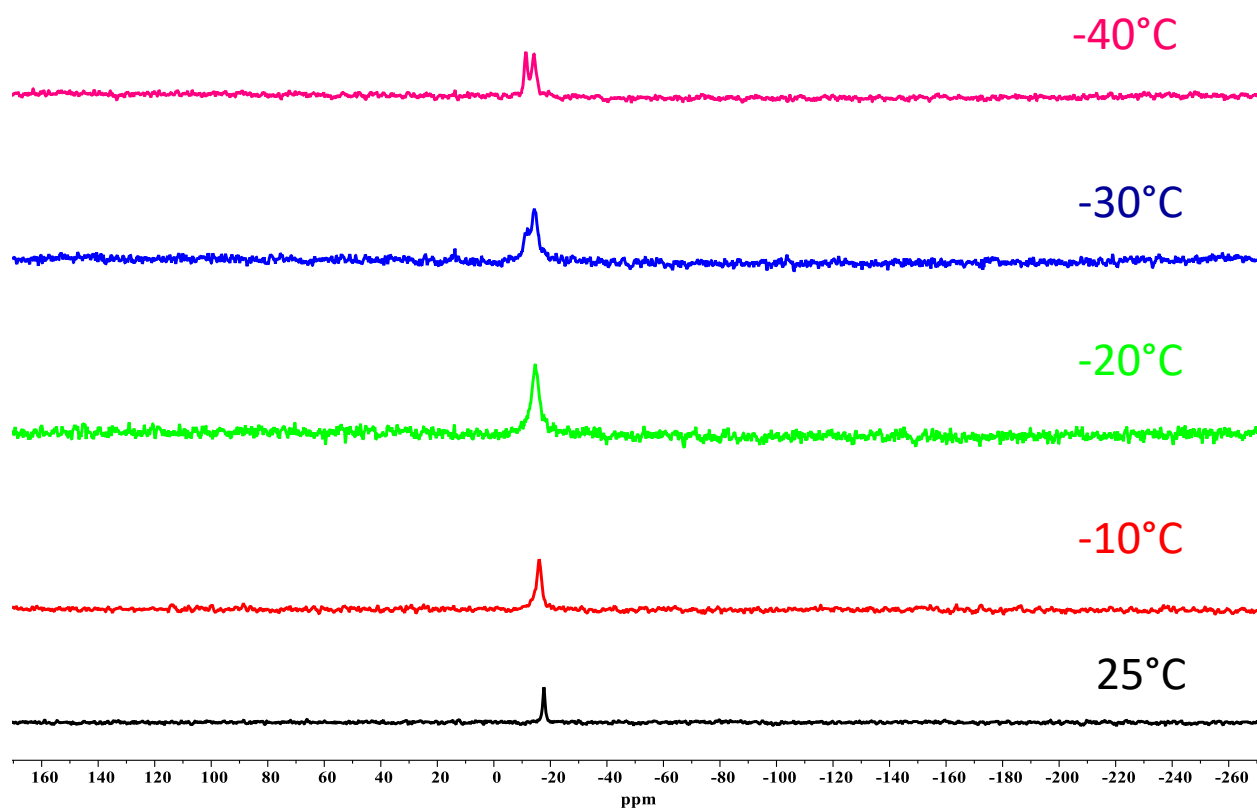

**Fig. S29.**  $^{31}\text{P}\{^1\text{H}\}$  VT NMR spectrum of **6** in  $\text{CDCl}_3$  (162 MHz).

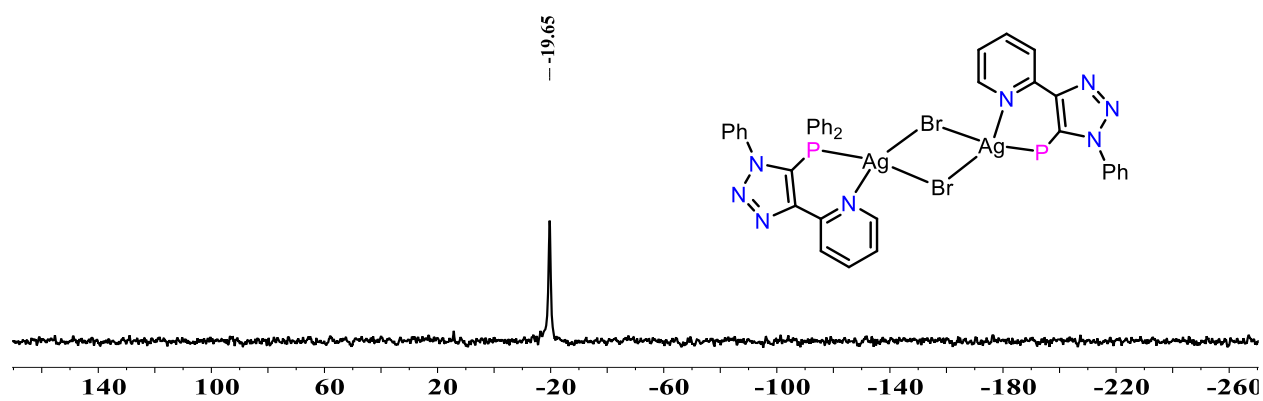

**Fig. S30.**  $^{31}\text{P}\{^1\text{H}\}$  NMR spectrum of **7** in  $\text{CDCl}_3$  (162 MHz).



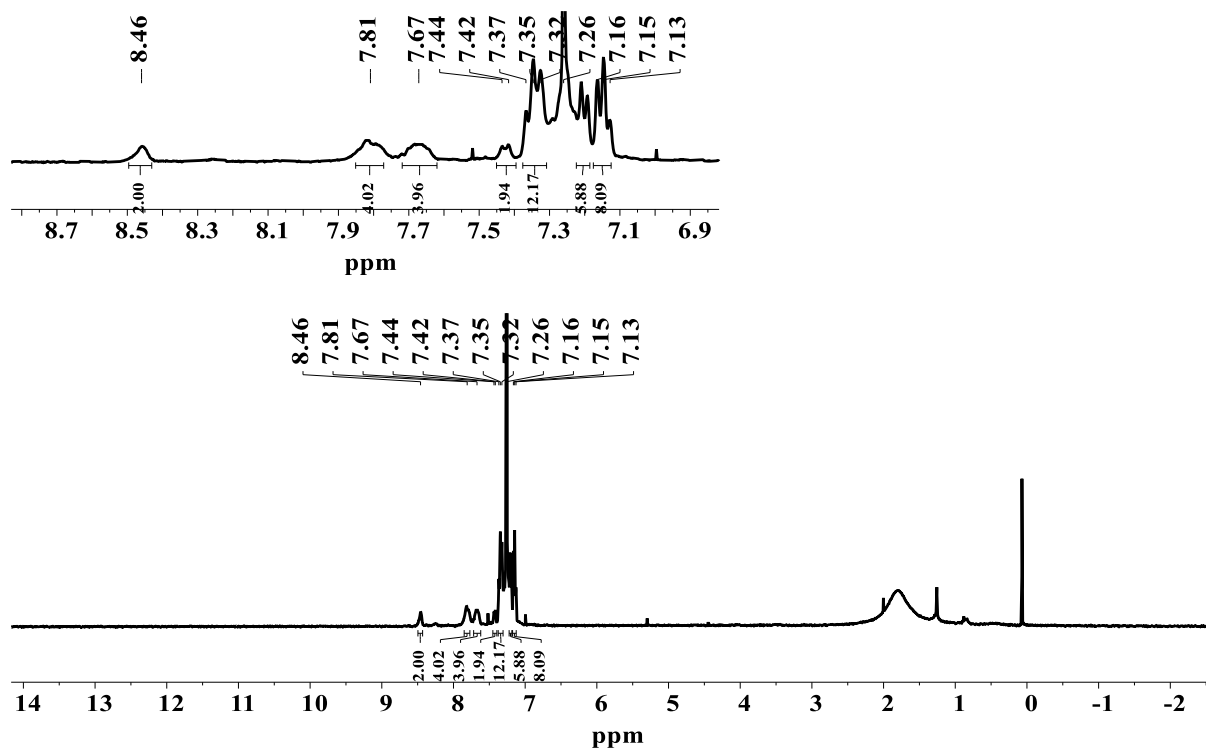

Fig. S31.  $^1\text{H}$  NMR spectrum of **7** in  $\text{CDCl}_3$  (400 MHz).

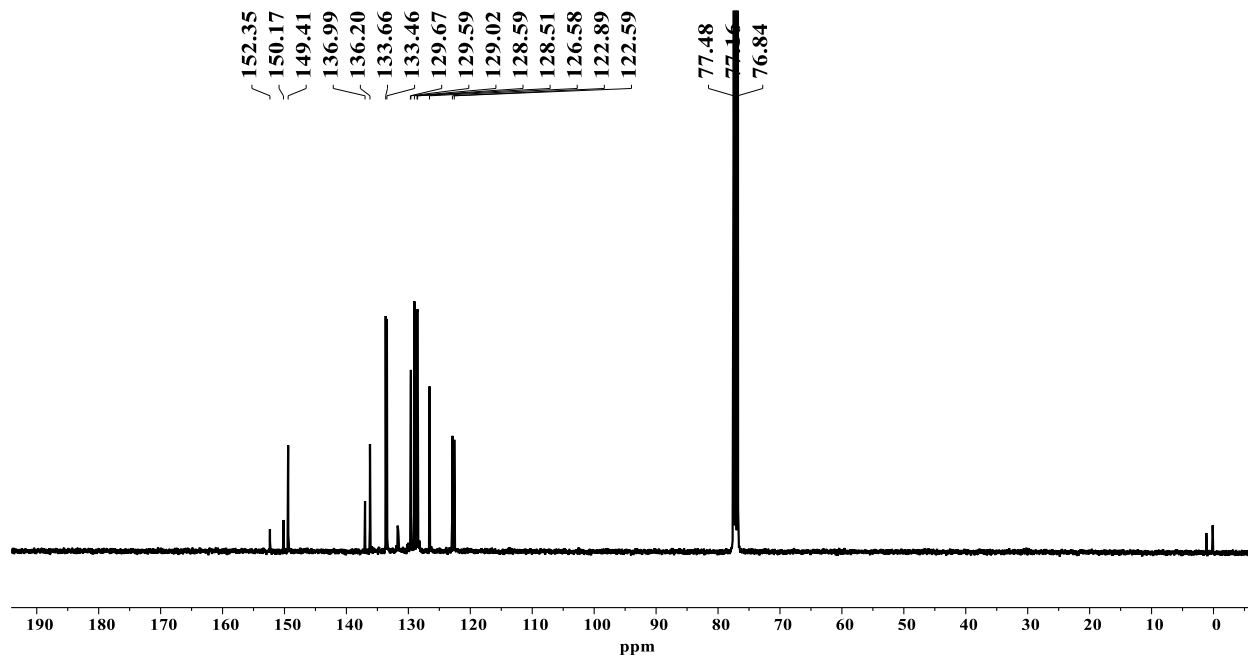

Fig. S32.  $^{13}\text{C}\{^1\text{H}\}$  NMR spectrum of **7** in  $\text{CDCl}_3$  (101 MHz).

DEPARTMENT OF CHEMISTRY, I.I.T.(B)

**Analysis Info**

Analysis Name D:\Data\DEC-2021\MSB-SSS-PN-AgBr.d  
 Method NaICsl\_pos\_2000.m  
 Sample Name MSB-SSS-PN-AgBr  
 Comment C50H38N8P2Ag2Br2

Acquisition Date 12/11/2021 11:47:51 AM

Operator MSB-OUT  
 Instrument maXis impact 282001.00081

**Acquisition Parameter**

|             |            |                      |          |                  |           |
|-------------|------------|----------------------|----------|------------------|-----------|
| Source Type | ESI        | Ion Polarity         | Positive | Set Nebulizer    | 0.3 Bar   |
| Focus       | Not active | Set Capillary        | 3700 V   | Set Dry Heater   | 180 °C    |
| Scan Begin  | 50 m/z     | Set End Plate Offset | -500 V   | Set Dry Gas      | 4.0 l/min |
| Scan End    | 2000 m/z   | Set Charging Voltage | 2000 V   | Set Divert Valve | Source    |
|             |            | Set Corona           | 0 nA     | Set APCI Heater  | 0 °C      |

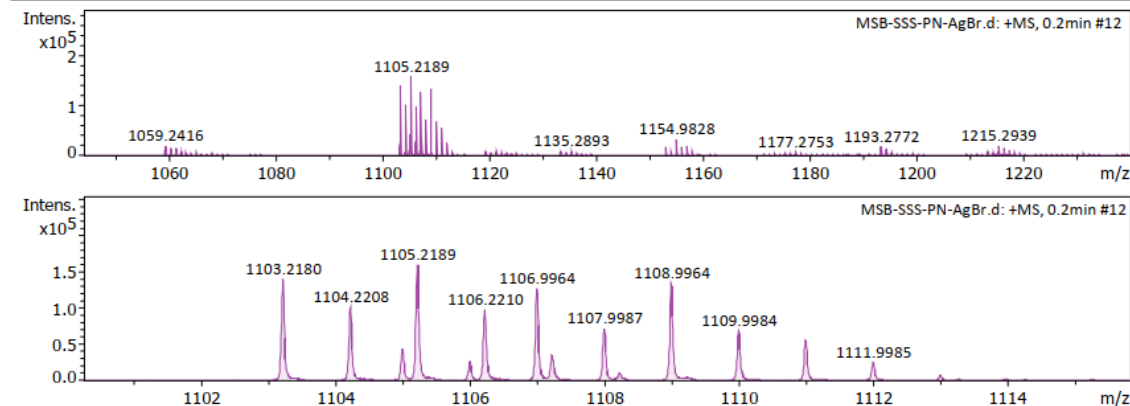

| Meas. m/z | # | Ion Formula     | m/z       | err [ppm] | mSigma | # mSigma | Score  | rdb  | e <sup>-</sup> Conf | N-Rule |
|-----------|---|-----------------|-----------|-----------|--------|----------|--------|------|---------------------|--------|
| 1108.9964 | 1 | C50H38Ag2BrN8P2 | 1104.9974 | 0.2       | 8.5    | 1        | 100.00 | 40.0 | even                | ok     |

Fig. S33. HRMS spectrum of 7.

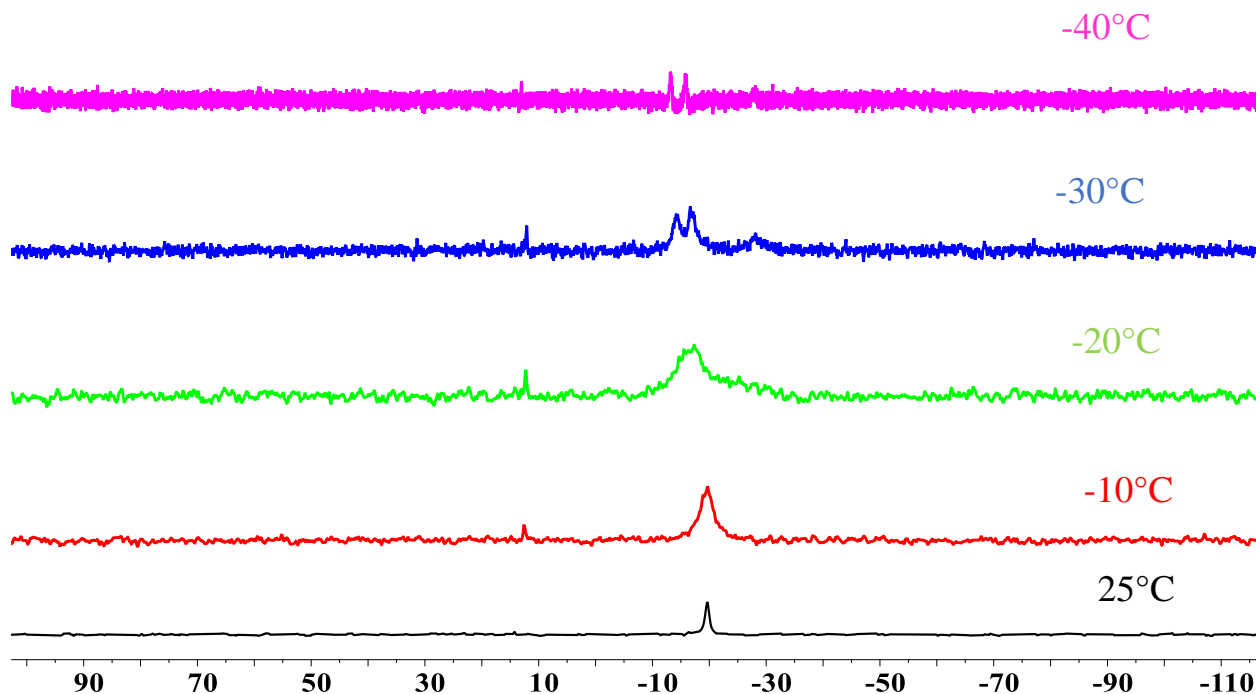

**Fig. S34.**  $^{31}\text{P}\{^1\text{H}\}$  VT NMR spectrum of **7** in  $\text{CDCl}_3$  (162 MHz).

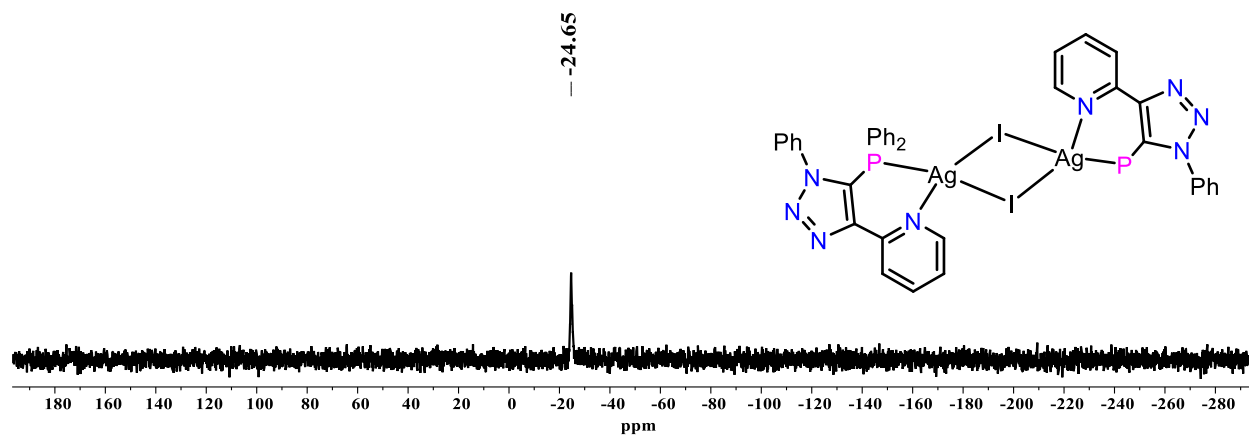

**Fig. S35.**  $^{31}\text{P}\{^1\text{H}\}$  NMR spectrum of **8** in  $\text{CDCl}_3$  (162 MHz).

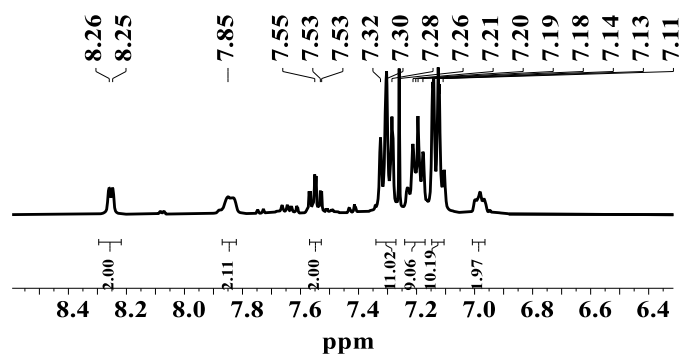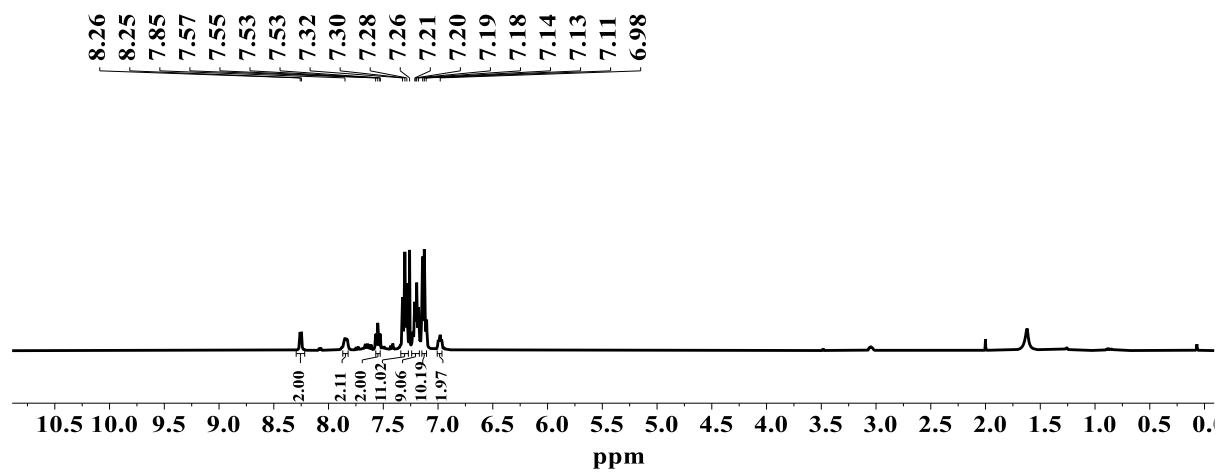

**Fig. S36.**  $^1\text{H}$  NMR spectrum of **8** in  $\text{CDCl}_3$  (400 MHz).

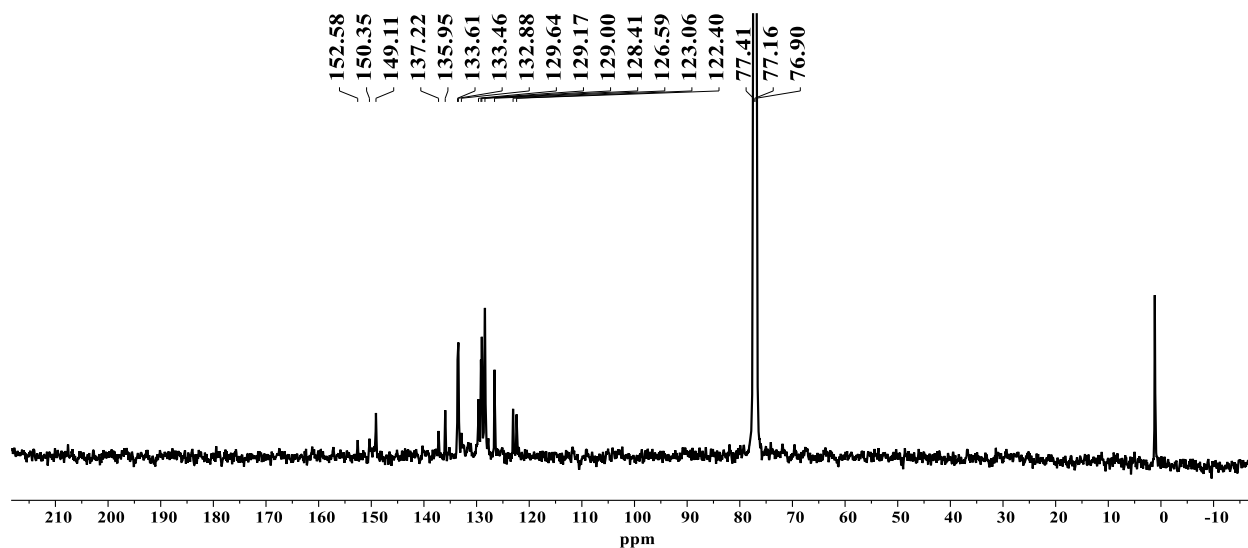

Fig. S37.  $^{13}\text{C}\{^1\text{H}\}$  NMR spectrum of **8** in  $\text{CDCl}_3$  (101 MHz).

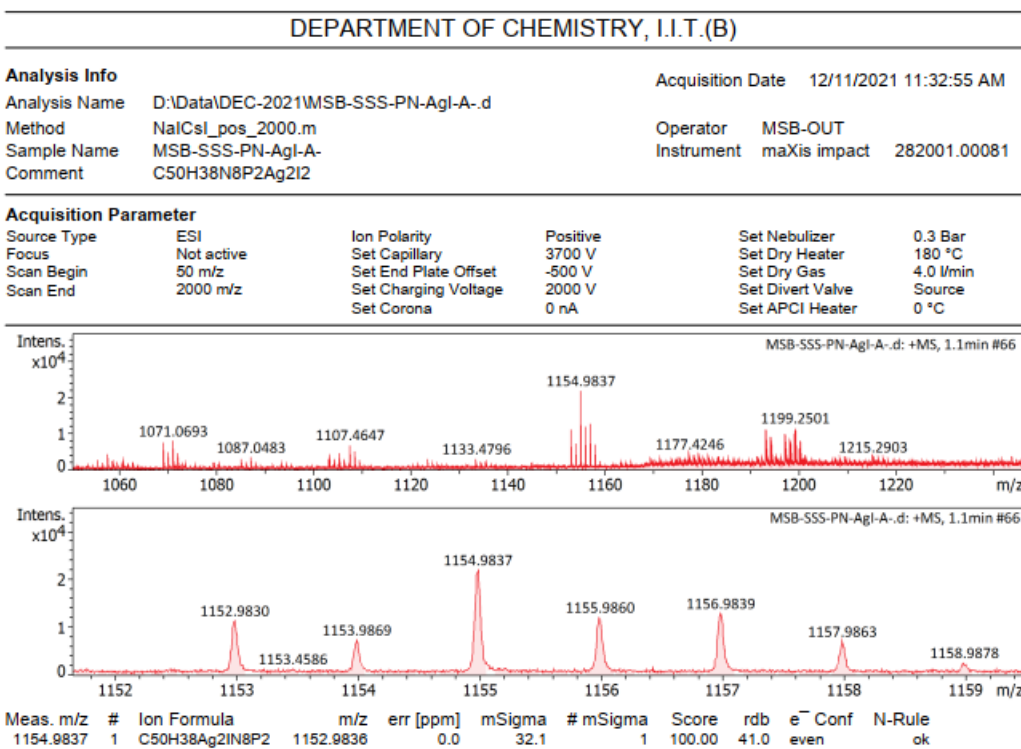

Fig. S38. HRMS spectrum of **8**.

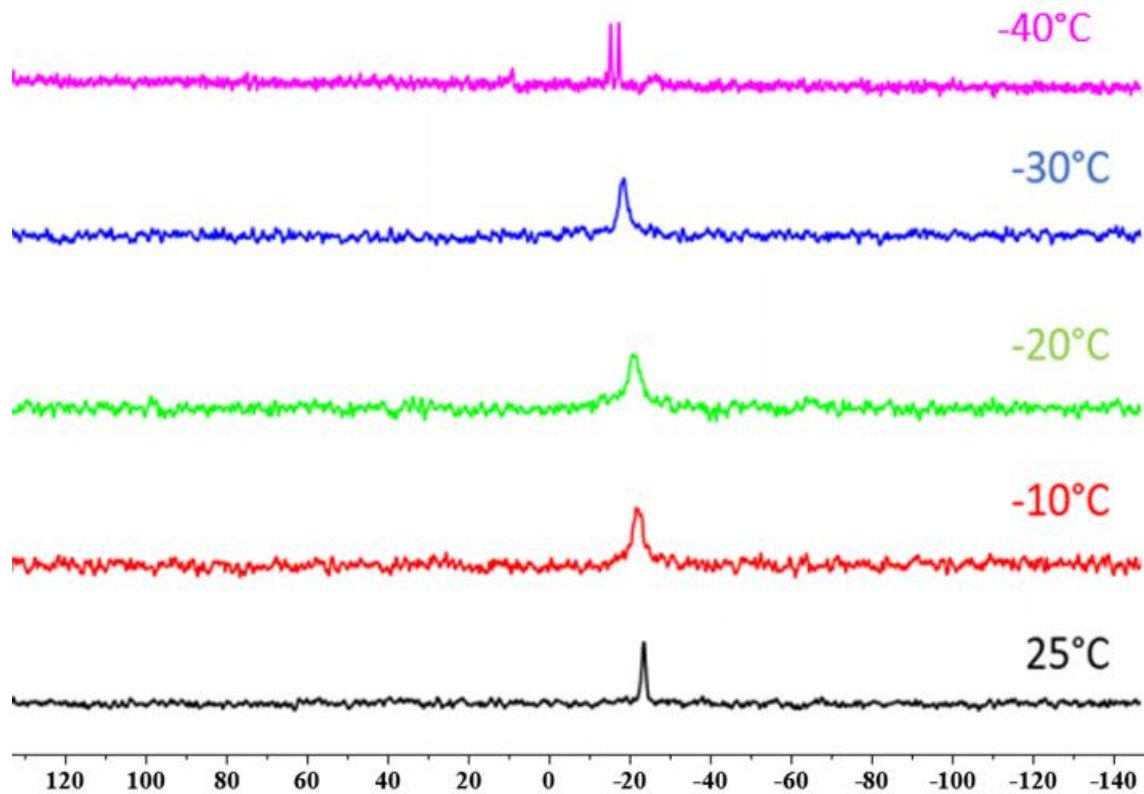

**Fig. S39.**  $^{31}\text{P}\{^1\text{H}\}$  VT NMR spectrum of **8** in  $\text{CDCl}_3$  (162 MHz).

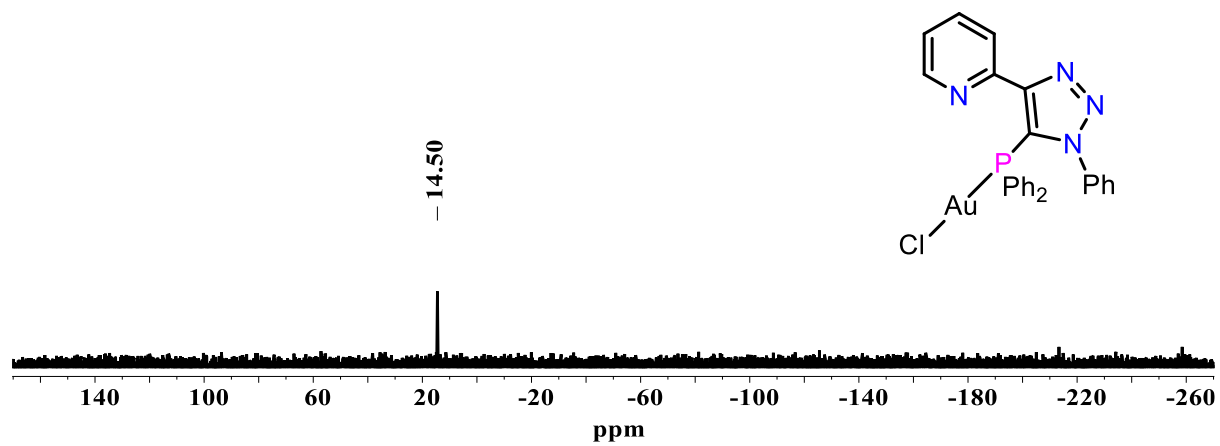

**Fig. S40.**  $^{31}\text{P}\{^1\text{H}\}$  NMR spectrum of **9** in  $\text{CDCl}_3$  (162 MHz).

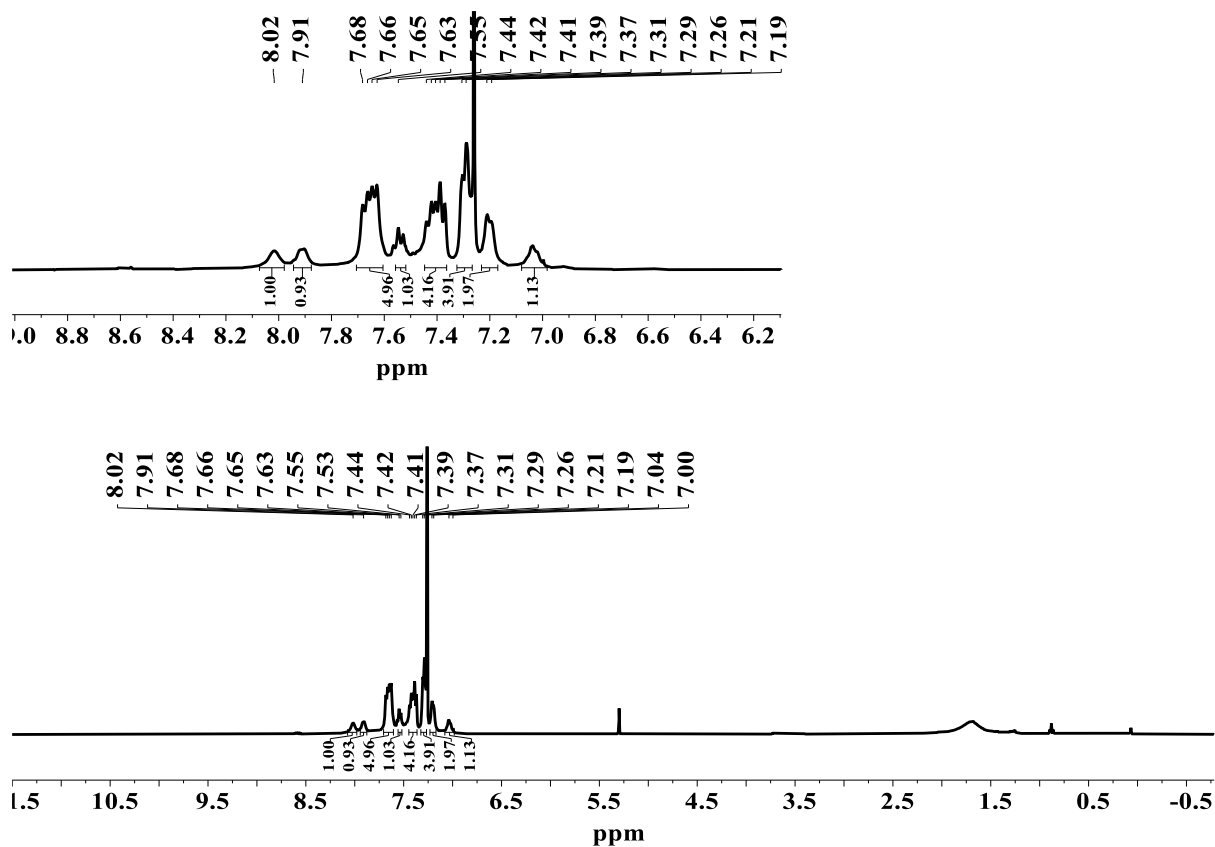

Fig. S41.  $^1\text{H}$  NMR spectrum of **9** in  $\text{CDCl}_3$  (400 MHz).

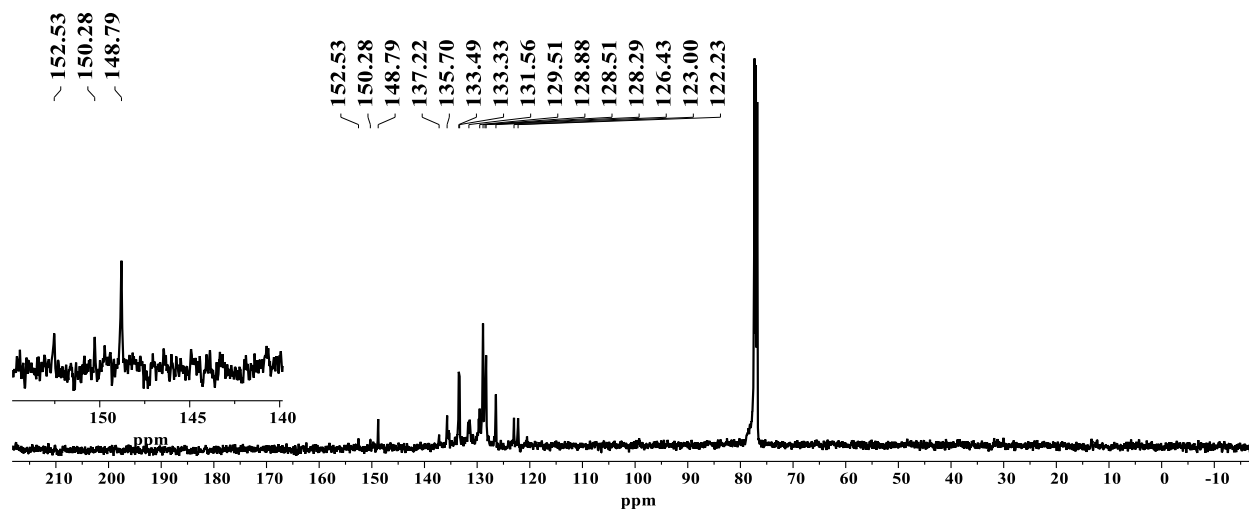

Fig. S42.  $^{13}\text{C}\{^1\text{H}\}$  NMR spectrum of **9** in  $\text{CDCl}_3$  (126 MHz).

DEPARTMENT OF CHEMISTRY, I.I.T.(B)

**Analysis Info**  
 Analysis Name D:\Data\NOV-2021\MSB-SSS-PN-Au-A.d Acquisition Date 11/23/2021 4:54:45 PM  
 Method Naformat\_pos\_1500.m Operator SJG-IN  
 Sample Name MSB-SSS-PN-Au-A Instrument maXis impact 282001.00081  
 Comment C25H19N4P1Au1Cl1

**Acquisition Parameter**

|             |            |                      |          |                  |           |
|-------------|------------|----------------------|----------|------------------|-----------|
| Source Type | ESI        | Ion Polarity         | Positive | Set Nebulizer    | 0.3 Bar   |
| Focus       | Not active | Set Capillary        | 3700 V   | Set Dry Heater   | 180 °C    |
| Scan Begin  | 50 m/z     | Set End Plate Offset | -500 V   | Set Dry Gas      | 4.0 l/min |
| Scan End    | 1500 m/z   | Set Charging Voltage | 2000 V   | Set Divert Valve | Source    |
|             |            | Set Corona           | 0 nA     | Set APCI Heater  | 0 °C      |

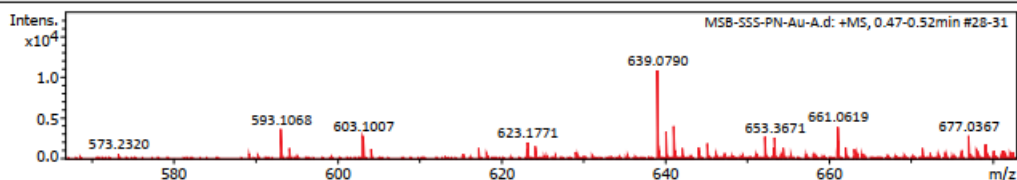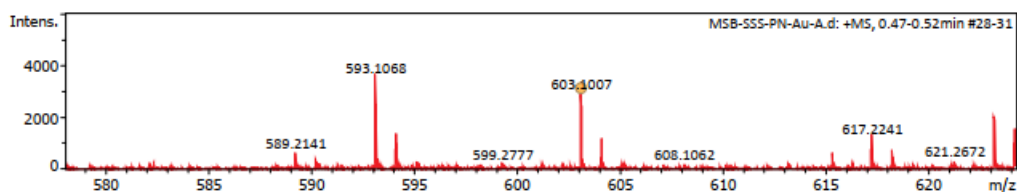

| Meas. m/z | # | Ion Formula | m/z      | err [ppm] | mSigma | # mSigma | Score  | rdb  | e <sup>-</sup> Conf | N-Rule |
|-----------|---|-------------|----------|-----------|--------|----------|--------|------|---------------------|--------|
| 603.1007  | 1 | C25H19AuN4P | 603.1008 | 0.0       | 73.9   | 1        | 100.00 | 21.0 | even                | ok     |

Fig. S43. HRMS spectrum of 9.

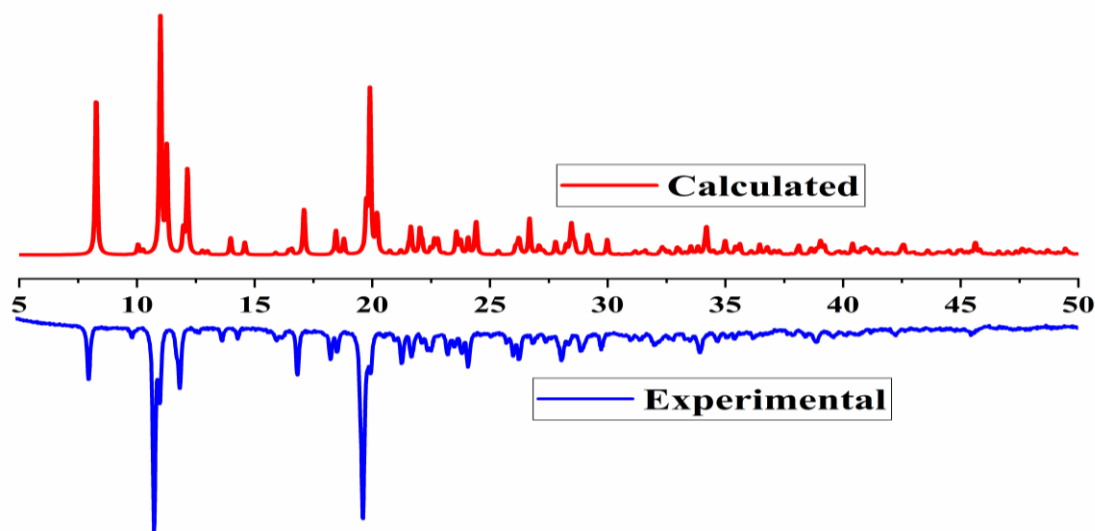

Fig. S44. PXRD profiles of PN-CuCl (2) at 298 K.

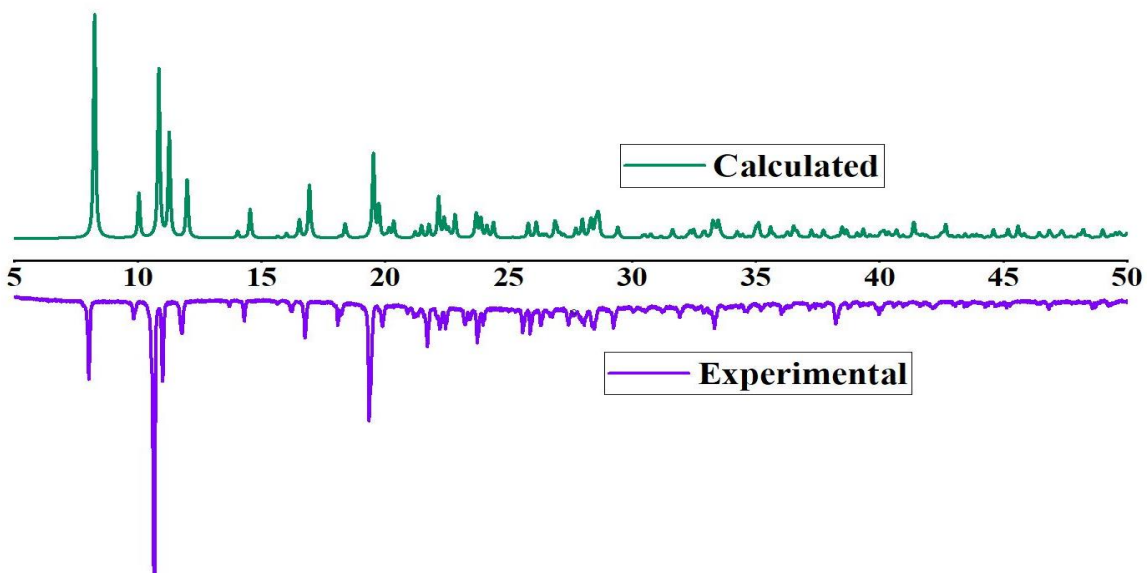

**Fig. S45.** PXRD profiles of PN-CuBr (**3**) at 298 K.

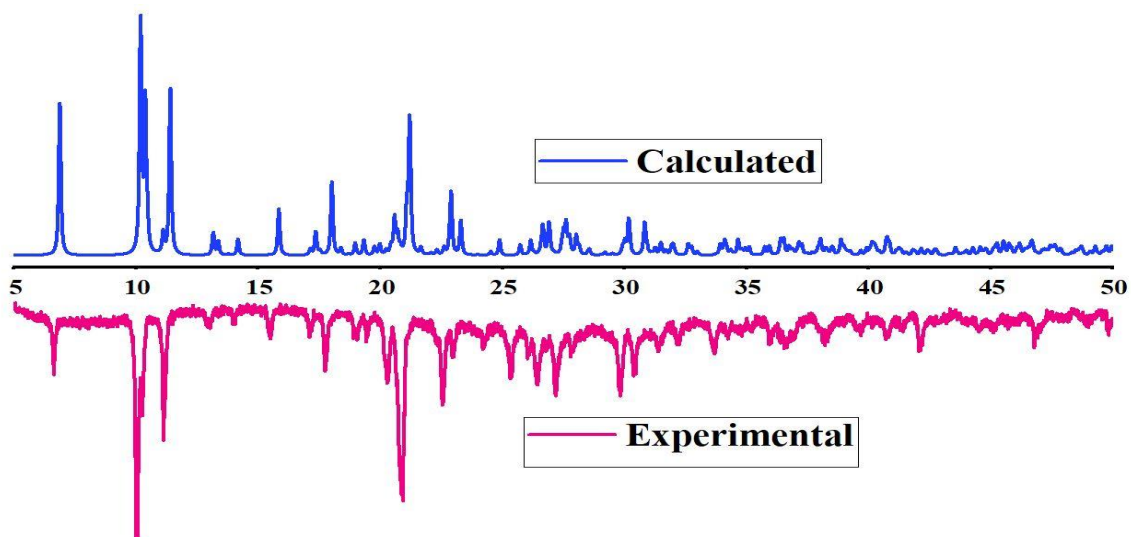

**Fig. S46.** PXRD profiles of PN-CuI (**4**) at 298 K.



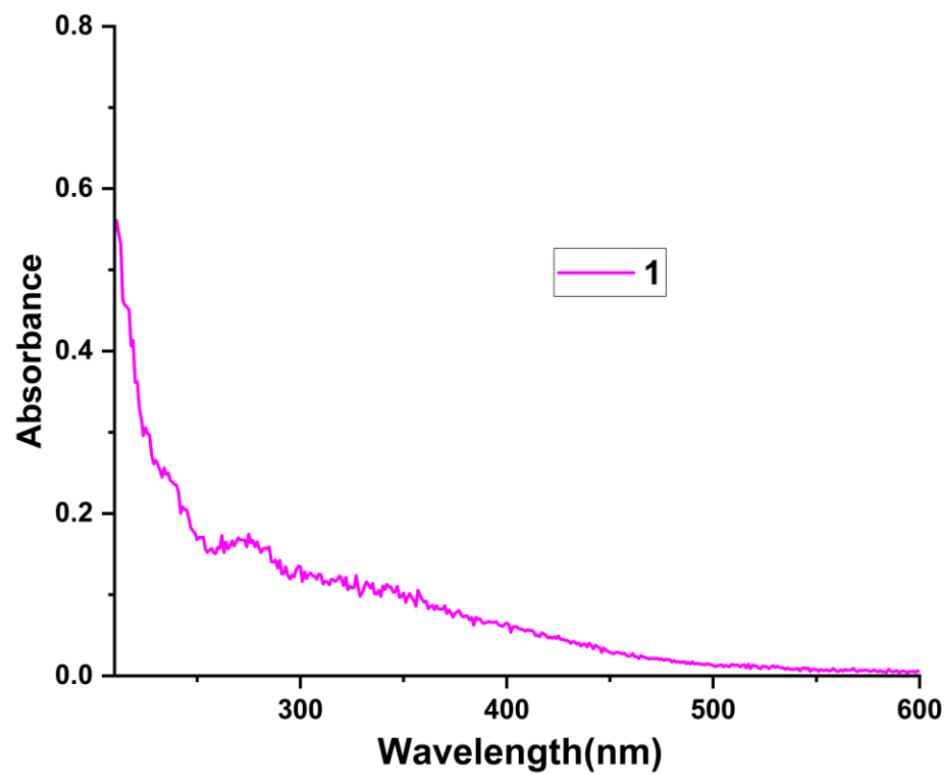

Fig. S47. Solid state UV absorption spectra for 1.

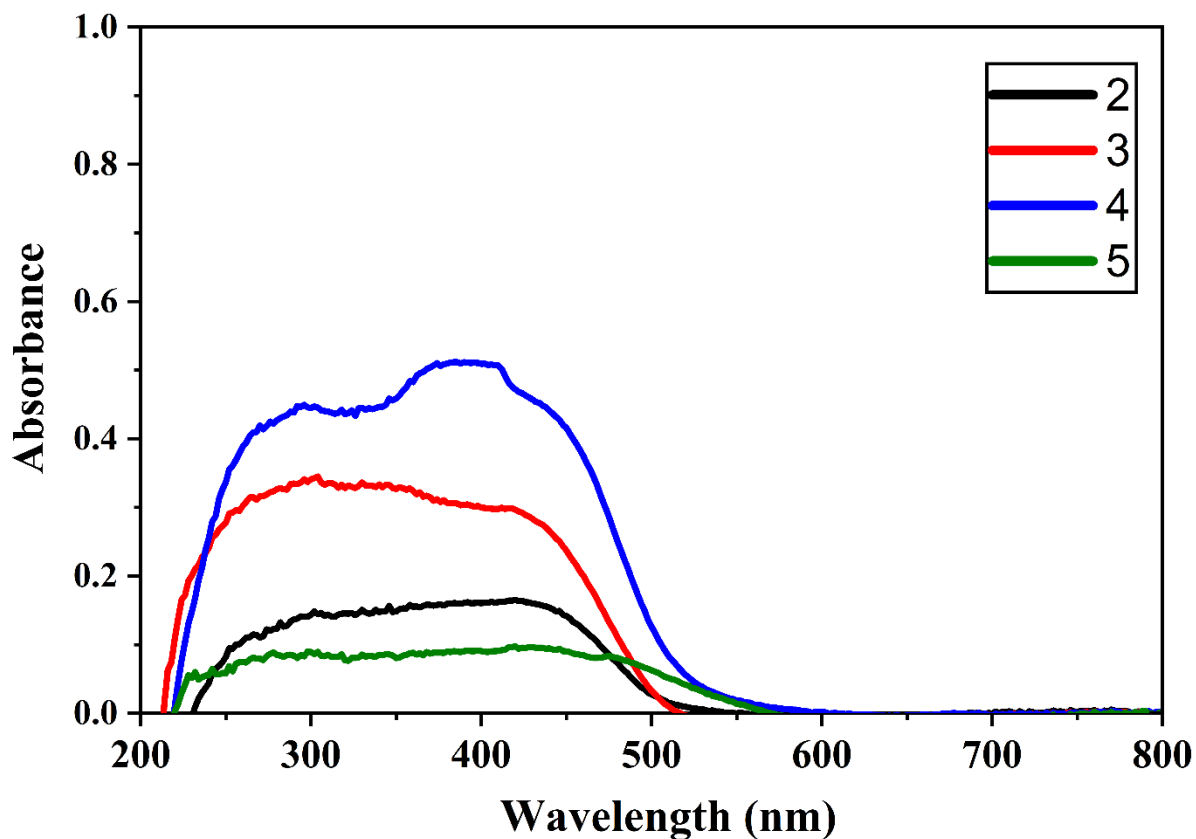

**Fig. S48.** Solid state UV-Vis spectra for **2-5**.

#### **General procedure for cross-coupling**

Phenol (1 eq) and bromobenzene (1 eq) derivatives were taken in a 10 ml catalytic tube: catalyst (0.5 mol%) with  $K_3PO_4$  (1 eq) loaded in DMSO (2 mL) as a solvent. The reaction mixture was stirred at 120 °C for 15 h, the corresponding product was isolated through the column chromatography technique.

## NMR spectral data of catalytic products

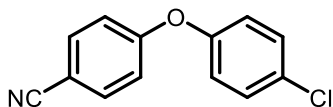

*4-(4-chlorophenoxy)benzonitrile (I)*.<sup>7</sup> Purified by column chromatography on silica gel using petroleum ether and ethyl acetate as eluents, 92 % (106 mg) yielded a white solid. <sup>1</sup>H NMR (400 MHz, CDCl<sub>3</sub>) δ 7.62 (s, 1H), 7.60 (s, 1H), 7.38 (s, 1H), 7.36 (s, 1H), 7.02 (d, *J* = 1.7 Hz, 2H), 7.00 (d, *J* = 3.9 Hz, 2H). <sup>13</sup>C{<sup>1</sup>H} NMR (101 MHz, CDCl<sub>3</sub>) δ 161.35, 154.25, 134.34, 130.52, 130.43, 121.80, 119.14, 118.13, 105.24.

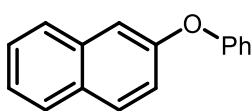

*2-phenoxy naphthalene (II)*.<sup>8</sup> Purified by column chromatography on silica gel using petroleum ether and ethyl acetate as eluents, 90 % (99 mg) yielded a white solid. <sup>1</sup>H NMR (400 MHz, CDCl<sub>3</sub>) δ 8.21 (d, *J* = 8.4 Hz, 1H), 7.88 (d, *J* = 8.7 Hz, 1H), 7.63 (d, *J* = 8.3 Hz, 1H), 7.55 – 7.46 (m, 2H), 7.41 – 7.31 (m, 3H), 7.14 – 7.08 (m, 1H), 7.05 (d, *J* = 8.7 Hz, 2H), 6.95 (d, *J* = 7.6 Hz, 1H). <sup>13</sup>C{<sup>1</sup>H} NMR (101 MHz, CDCl<sub>3</sub>) δ 158.02, 153.17, 135.09, 129.93, 127.90, 127.02, 126.62, 126.07, 125.94, 123.49, 123.28, 122.25, 118.73, 113.64.

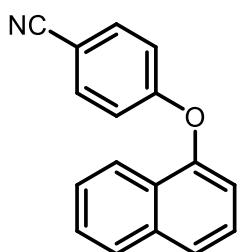

*4-(naphthalen-1-yloxy)benzonitrile (III)*.<sup>9</sup> Purified by column chromatography on silica gel using petroleum ether and ethyl acetate as eluents, 79 % (97 mg) yielded a white solid. <sup>1</sup>H NMR (500 MHz, CDCl<sub>3</sub>) δ 7.93 (dd, *J* = 14.4, 8.3 Hz, 2H), 7.76 (d, *J* = 8.2 Hz, 1H), 7.59 (d, *J* = 8.8 Hz, 2H), 7.55 (d, *J* = 8.2 Hz, 1H), 7.48 (dd, *J* = 16.3, 5.6 Hz, 2H), 7.14 (d, *J* = 7.5 Hz, 1H), 7.01 (d, *J* = 8.8 Hz, 2H). <sup>13</sup>C{<sup>1</sup>H} NMR (126 MHz, CDCl<sub>3</sub>) δ 162.41, 150.58, 135.29, 134.37, 128.26, 127.05, 126.74, 125.96, 125.65, 121.76, 118.99, 117.64, 116.48, 105.91.

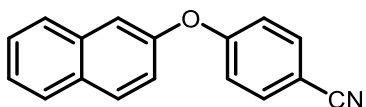

*4-(naphthalen-2-yloxy)benzonitrile (IV)*.<sup>10</sup> Purified by column chromatography on silica gel using petroleum ether and ethyl acetate as eluents, 85 % (104 mg) yielded a white solid. <sup>1</sup>H NMR (500 MHz, CDCl<sub>3</sub>) δ 7.52 (dd, *J*

= 16.0, 8.2 Hz, 2H), 7.41 (d,  $J = 9.5$  Hz, 1H), 7.26 (d,  $J = 8.9$  Hz, 2H), 7.17 – 7.10 (m, 3H), 6.89 (d,  $J = 10.5$  Hz, 1H), 6.70 (d,  $J = 4.7$  Hz, 2H).  $^{13}\text{C}\{^1\text{H}\}$  NMR (126 MHz,  $\text{CDCl}_3$ )  $\delta$  161.79, 152.59, 134.32, 131.15, 130.64, 128.01, 127.50, 127.08, 125.79, 120.40, 118.96, 118.26, 116.89, 106.15.

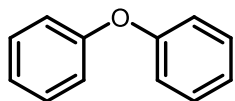

*oxydibenzene* (**V**).<sup>8</sup> Purified by column chromatography on silica gel using petroleum ether and ethyl acetate as eluents, 97 % (82 mg) colorless liquid.  $^1\text{H}$

NMR (500 MHz,  $\text{CDCl}_3$ )  $\delta$  7.49 (t,  $J = 8.0$  Hz, 2H), 7.39 (t,  $J = 8.0$  Hz, 2H), 7.26 (t,  $J = 6.9$  Hz, 1H), 7.17 (d,  $J = 8.9$  Hz, 3H), 7.08 (d,  $J = 10.5$  Hz, 2H).  $^{13}\text{C}$  NMR (126 MHz,  $\text{CDCl}_3$ )  $\delta$  157.38, 129.87, 123.35, 119.02.

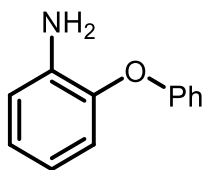

*2-phenoxyaniline* (**VI**).<sup>11</sup> Purified by column chromatography on silica gel using petroleum ether and ethyl acetate as eluents, 75 % (70 mg) yielded a

white solid.  $^1\text{H}$  NMR (400 MHz,  $\text{CDCl}_3$ )  $\delta$  7.28 (dd,  $J = 8.7, 7.4$  Hz, 2H), 7.03 (t,  $J = 7.4$  Hz, 1H), 6.99 – 6.92 (m, 3H), 6.86 (d,  $J = 1.6$  Hz, 1H), 6.84 (d,  $J = 2.4$  Hz, 1H), 6.75 – 6.69 (m, 1H), 3.63 (br, 2H)  $^{13}\text{C}\{^1\text{H}\}$  NMR (101 MHz,  $\text{CDCl}_3$ )  $\delta$  157.47, 143.71, 137.79, 129.86, 124.92, 122.91, 120.18, 119.58, 117.46, 117.13.

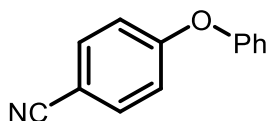

*4-phenoxybenzotrile* (**VII**).<sup>12</sup> Purified by column chromatography on silica gel using petroleum ether and ethyl acetate as eluents, 82 % (80

mg) yielded a colorless liquid.  $^1\text{H}$  NMR (400 MHz,  $\text{CDCl}_3$ )  $\delta$  7.60 (d,  $J = 9.1$  Hz, 2H), 7.41 (t,  $J = 7.6$  Hz, 2H), 7.22 (d,  $J = 7.5$  Hz, 1H), 7.07 (d,  $J = 8.8$  Hz, 2H), 7.00 (d,  $J = 8.9$  Hz, 2H).  $^{13}\text{C}\{^1\text{H}\}$  NMR (101 MHz,  $\text{CDCl}_3$ )  $\delta$  161.78, 154.92, 134.24, 130.35, 125.26, 120.52, 118.96, 118.03, 105.93.

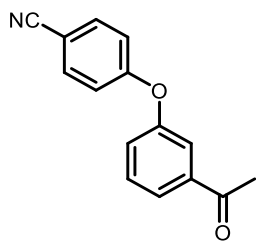

*4-(3-acetylphenoxy)benzonitrile* (**VIII**). Purified by column chromatography on silica gel using petroleum ether and ethyl acetate as eluents, 83 % (98 mg) yielded a colorless liquid.  $^1\text{H}$  NMR (500 MHz,  $\text{CDCl}_3$ )  $\delta$  7.81 (d,  $J = 7.8$  Hz, 1H), 7.66 – 7.60 (m, 3H), 7.54 – 7.49 (m, 1H), 7.27 (d,  $J = 8.1$  Hz, 1H), 7.02 (d,  $J = 7.5$  Hz, 2H), 2.60 (s, 3H).  $^{13}\text{C}\{^1\text{H}\}$  NMR (126 MHz,  $\text{CDCl}_3$ )  $\delta$  197.02, 161.06, 155.41, 139.34, 134.36, 130.60, 125.08, 124.95, 119.68, 118.70, 118.30, 106.56, 26.81.

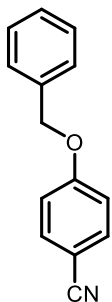

*4-(benzyloxy)benzonitrile* (**IX**).<sup>13</sup> Purified by column chromatography on silica gel using petroleum ether and ethyl acetate as eluents, 65 % (68 mg) yielded a yellow oil.  $^1\text{H}$  NMR (400 MHz,  $\text{CDCl}_3$ )  $\delta$  7.60 (s, 1H), 7.58 (s, 1H), 7.41 (d,  $J = 5.1$  Hz, 4H), 7.03 (s, 1H), 7.01 (s, 1H), 5.12 (s, 2H).  $^{13}\text{C}\{^1\text{H}\}$  NMR (101 MHz,  $\text{CDCl}_3$ )  $\delta$  161.98, 135.70, 134.04, 128.79, 128.44, 127.49, 119.19, 115.61, 104.26, 70.30.

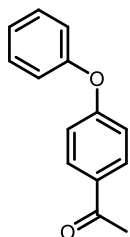

*1-(4-phenoxyphenyl)ethan-1-one* (**X**).<sup>14</sup> Purified by column chromatography on silica gel using petroleum ether and ethyl acetate as eluents, 78 % (83 mg) yielded as a yellowish liquid.  $^1\text{H}$  NMR (400 MHz,  $\text{CDCl}_3$ )  $\delta$  7.98 (d,  $J = 6.8$  Hz, 2H), 7.44 (d,  $J = 9.5$  Hz, 2H), 7.26 – 7.21 (m, 1H), 7.11 (d,  $J = 6.7$  Hz, 2H), 7.04 (d,  $J = 8.9$  Hz, 2H), 2.61 (s, 3H).  $^{13}\text{C}\{^1\text{H}\}$  NMR (101 MHz,  $\text{CDCl}_3$ )  $\delta$  196.91, 162.13, 155.62, 132.02, 130.73, 130.19, 124.75, 120.31, 117.42, 26.59.

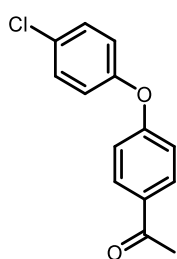

*1-(4-(4-chlorophenoxy)phenyl)ethan-1-one* (**XI**).<sup>15</sup> Purified by column chromatography on silica gel using petroleum ether and ethyl acetate as eluents, 81 % (100 mg) yield as yellowish liquid.  $^1\text{H}$  NMR (500 MHz,  $\text{CDCl}_3$ )  $\delta$  7.94 (d,  $J = 8.9$  Hz, 2H), 7.35 (d,  $J = 9.0$  Hz, 2H), 7.00 (d,  $J = 5.3$  Hz, 2H), 6.99 (d,  $J = 5.3$  Hz,

2H), 2.57 (s, 3H).  $^{13}\text{C}\{^1\text{H}\}$  NMR (126 MHz,  $\text{CDCl}_3$ )  $\delta$  196.80, 161.63, 154.29, 132.39, 130.79, 130.22, 129.87, 121.50, 117.52, 26.60.

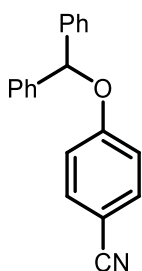

*4-(benzhydryloxy)benzonitrile* (**XII**).<sup>16</sup> Purified by column chromatography on silica gel using petroleum ether and ethyl acetate as eluents, 60 % (85 mg) yield as colorless liquid.  $^1\text{H}$  NMR (500 MHz,  $\text{CDCl}_3$ )  $\delta$  7.51 (d,  $J = 8.2$  Hz, 2H), 7.41 – 7.33 (m, 8H), 7.30 (t,  $J = 7.0$  Hz, 2H), 7.00 (d,  $J = 8.4$  Hz, 2H), 6.25 (s, 1H).

$^{13}\text{C}\{^1\text{H}\}$  NMR (126 MHz,  $\text{CDCl}_3$ )  $\delta$  161.41, 140.15, 134.06, 128.97, 128.35, 126.91, 119.26, 116.82, 104.40, 82.27.

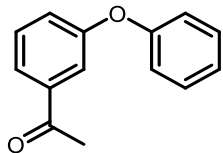

*1-(3-phenoxyphenyl)ethan-1-one* (**XIII**). Purified by column chromatography on silica gel using petroleum ether and ethyl acetate as eluents, 83 % (88 mg) yield as yellowish liquid.  $^1\text{H}$  NMR (500 MHz,  $\text{CDCl}_3$ )

$\delta$  7.70 – 7.66 (m, 1H), 7.58 (s, 1H), 7.42 (t,  $J = 7.9$  Hz, 1H), 7.38 – 7.34 (m, 2H), 7.21 (d,  $J = 10.7$  Hz, 1H), 7.15 (d,  $J = 7.5$  Hz, 1H), 7.02 (d,  $J = 9.8$  Hz, 2H), 2.57 (s, 3H).  $^{13}\text{C}\{^1\text{H}\}$  NMR (126 MHz,  $\text{CDCl}_3$ )  $\delta$  197.63, 157.90, 156.74, 139.03, 130.10, 123.98, 123.48, 123.24, 119.26, 118.25, 26.89.

## NMR spectra of catalytic products

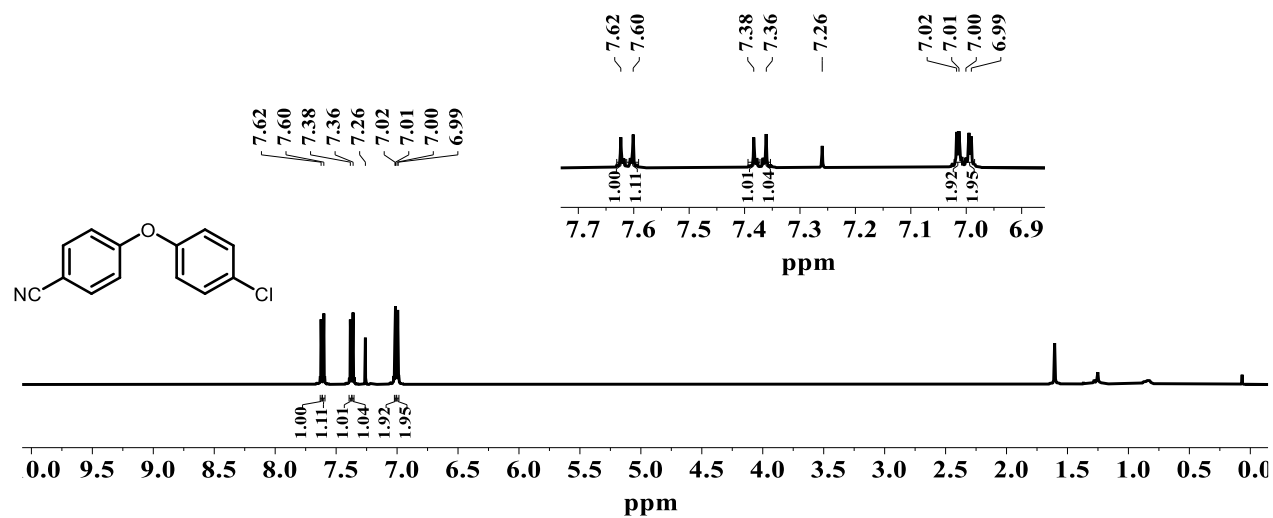

Fig. S49.  $^1\text{H}$  NMR spectrum of **I** in  $\text{CDCl}_3$  (400 MHz).

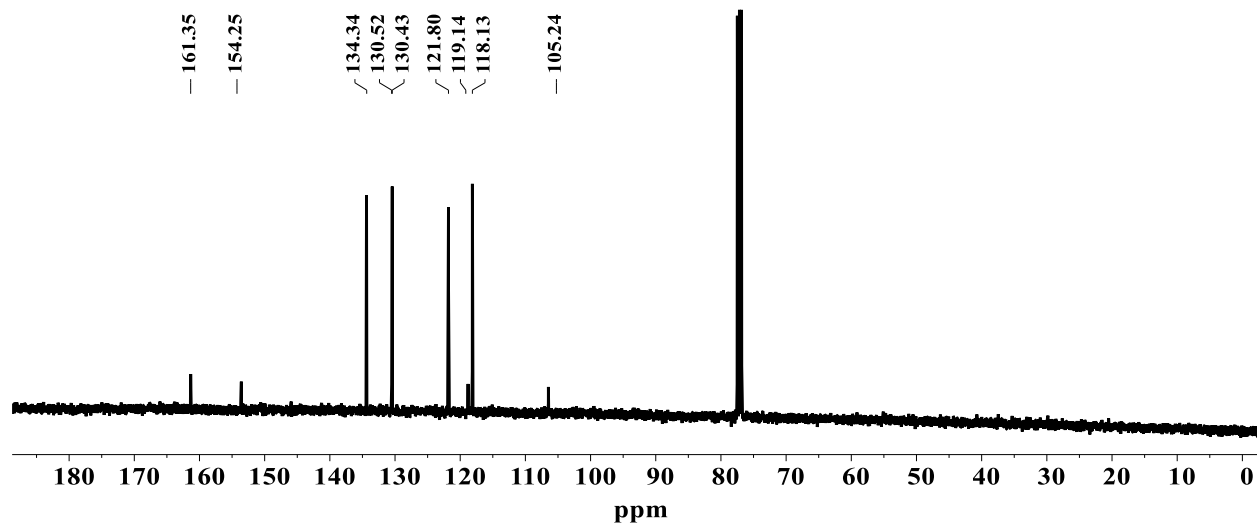

Fig. S50.  $^{13}\text{C}\{^1\text{H}\}$  NMR spectrum of **I** in  $\text{CDCl}_3$  (101 MHz).

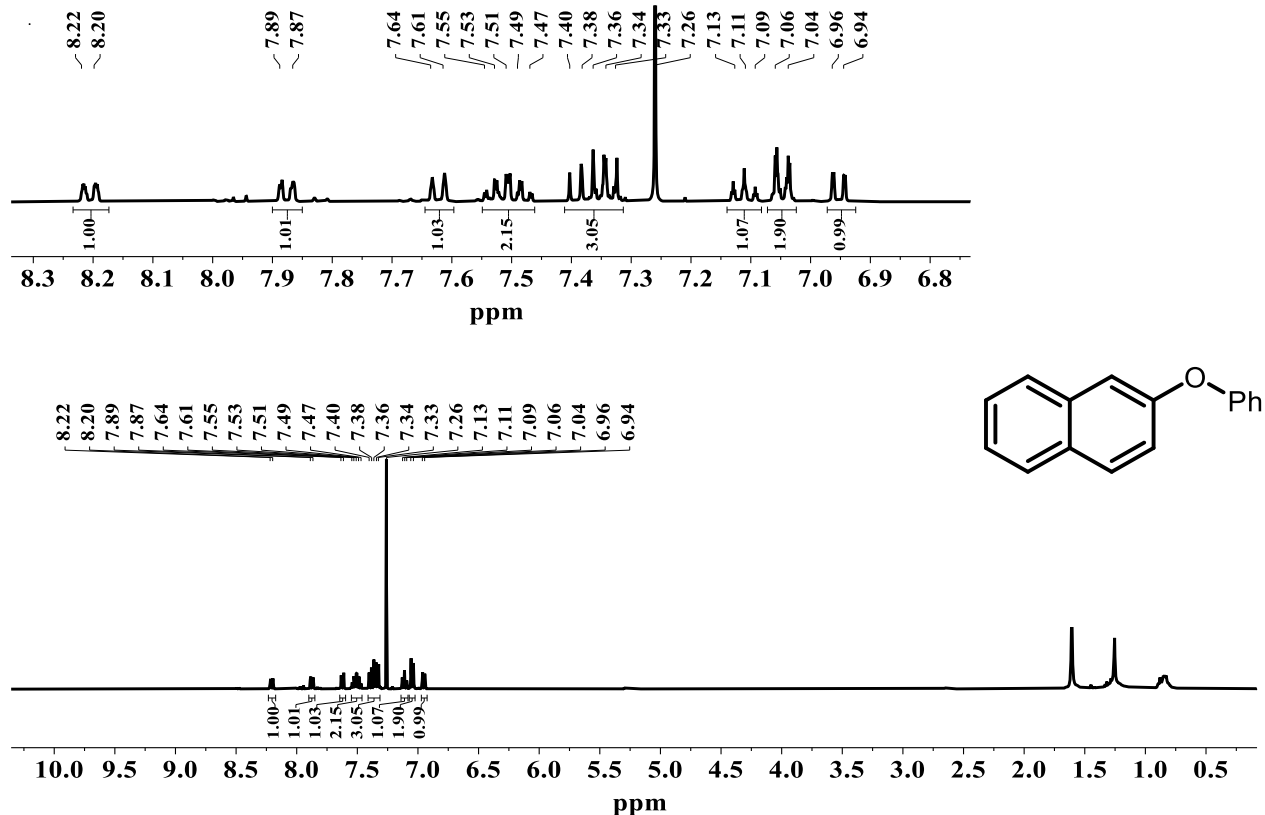

Fig. S51. <sup>1</sup>H NMR spectrum of **II** in CDCl<sub>3</sub> ((400 MHz).

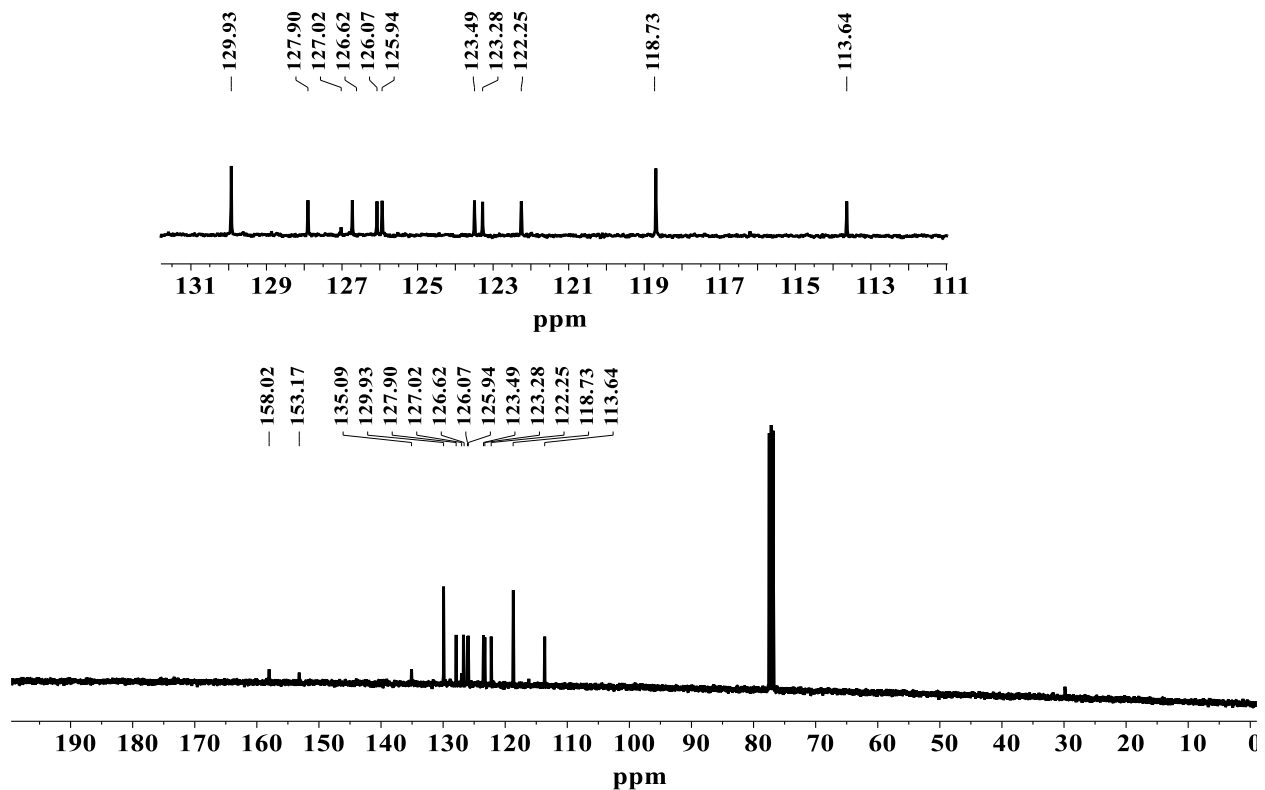

Fig. S52. <sup>13</sup>C{<sup>1</sup>H} NMR spectrum of **II** in CDCl<sub>3</sub> ((101 MHz).



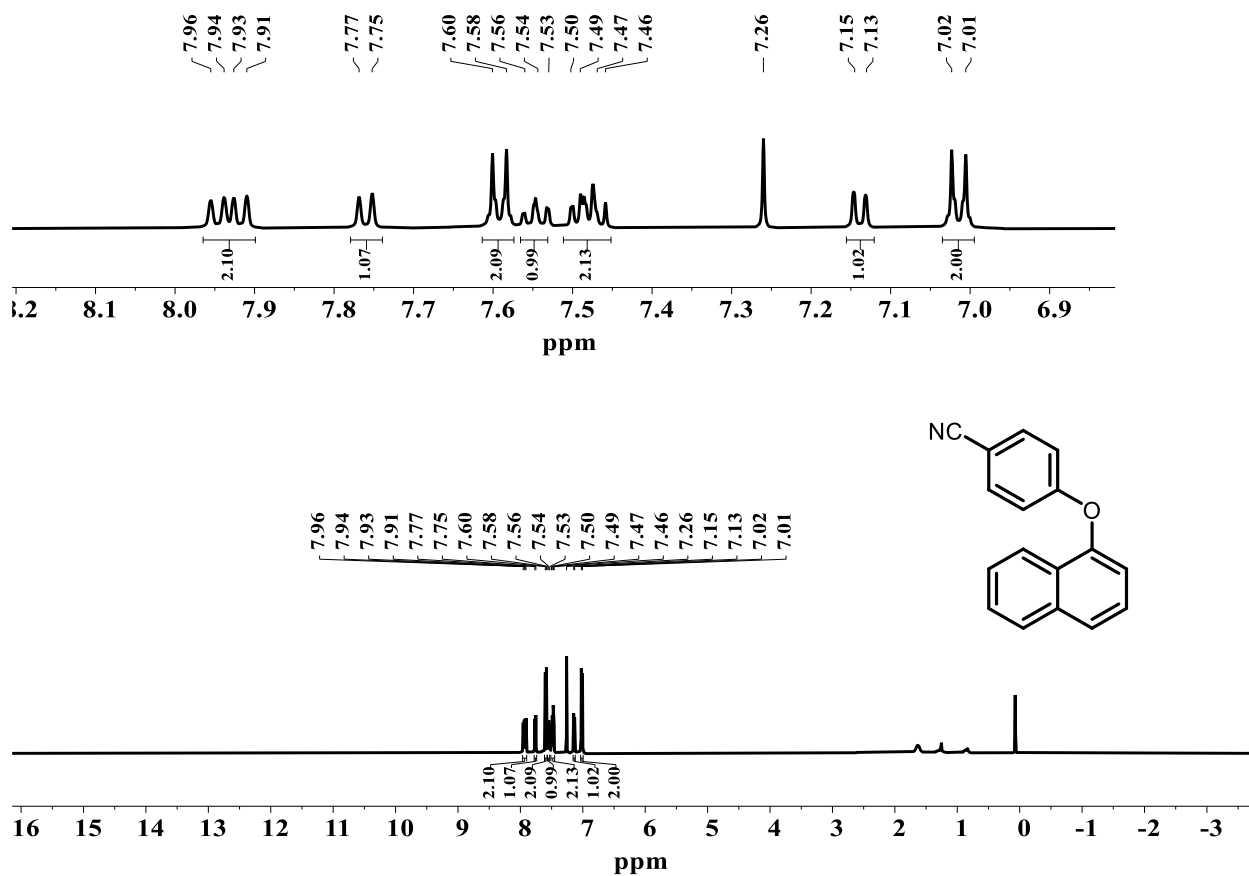

Fig. S53. <sup>1</sup>H NMR spectrum of **III** in CDCl<sub>3</sub> (500 MHz).

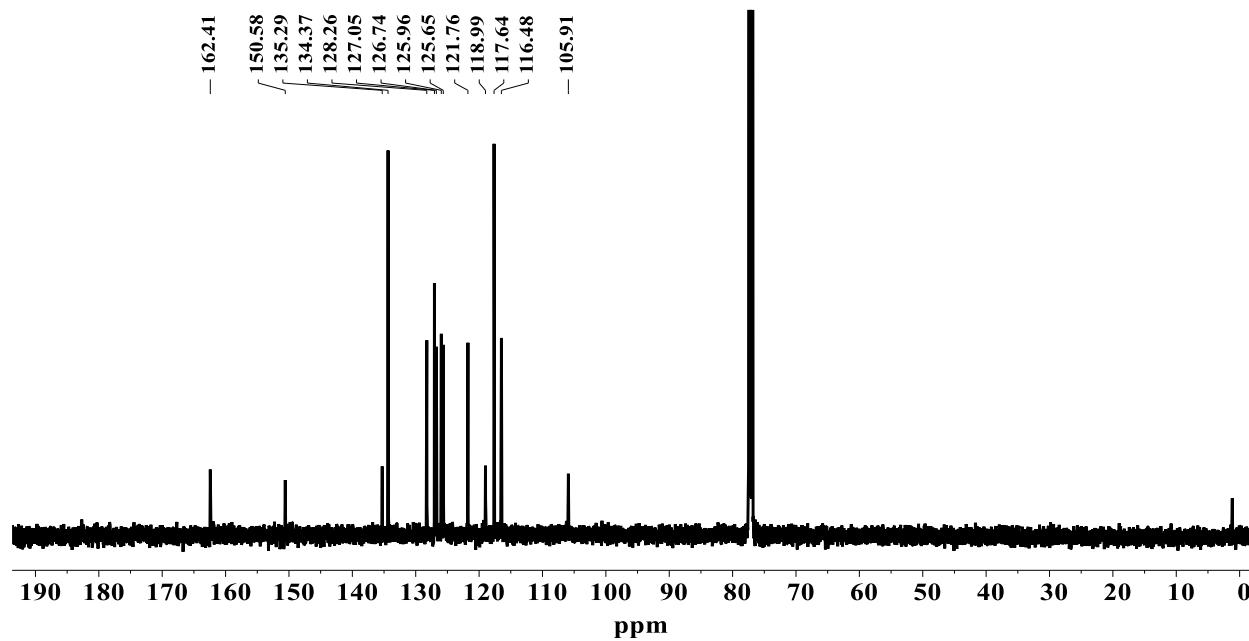

Fig. S54. <sup>13</sup>C{<sup>1</sup>H} NMR spectrum of **III** in CDCl<sub>3</sub> (126 MHz).

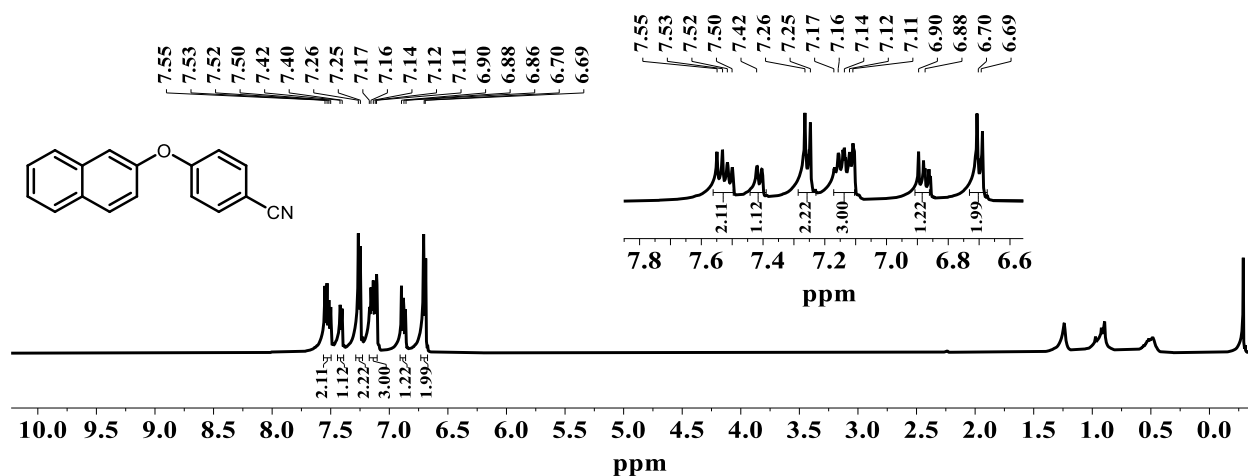

**Fig. S55.**  $^1\text{H}$  NMR spectrum of **IV** in  $\text{CDCl}_3$  (500 MHz).

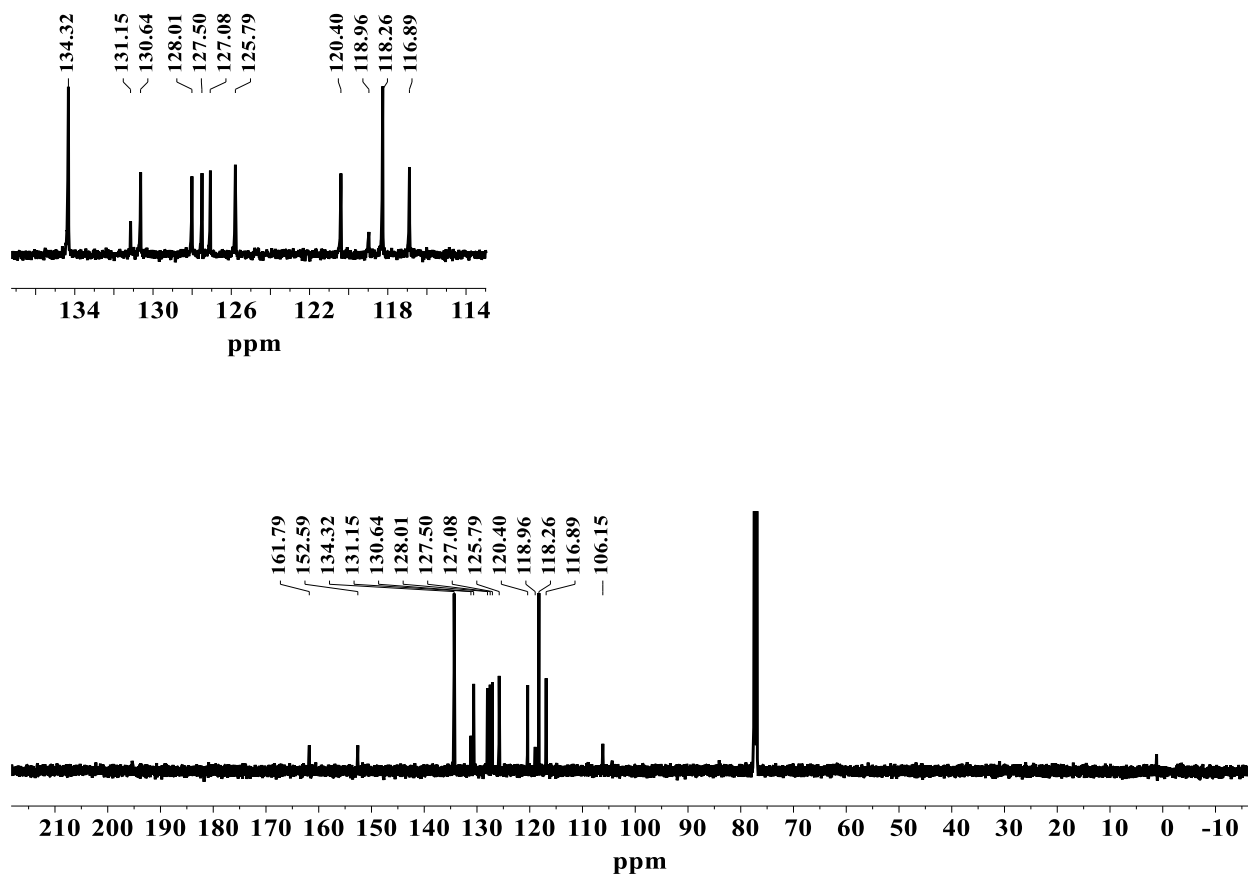

**Fig. S56.**  $^{13}\text{C}\{^1\text{H}\}$  NMR spectrum of **IV** in  $\text{CDCl}_3$  (126 MHz).

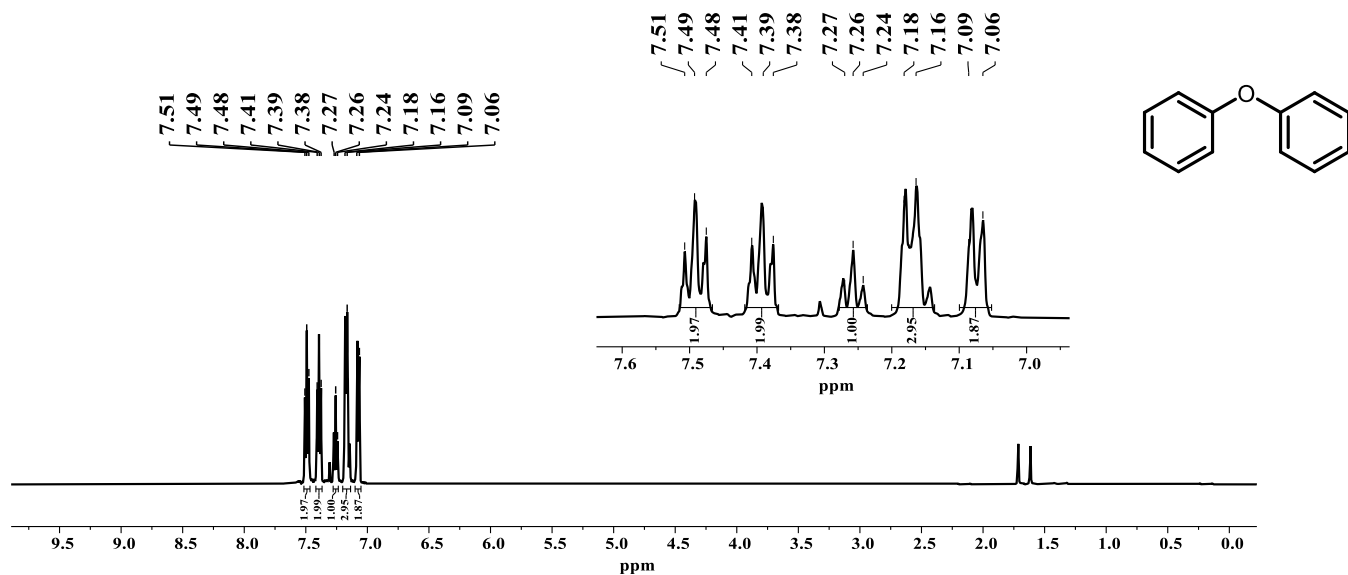

**Fig. S57.**  $^1\text{H}$  NMR spectrum of **V** in  $\text{CDCl}_3$  (500 MHz).

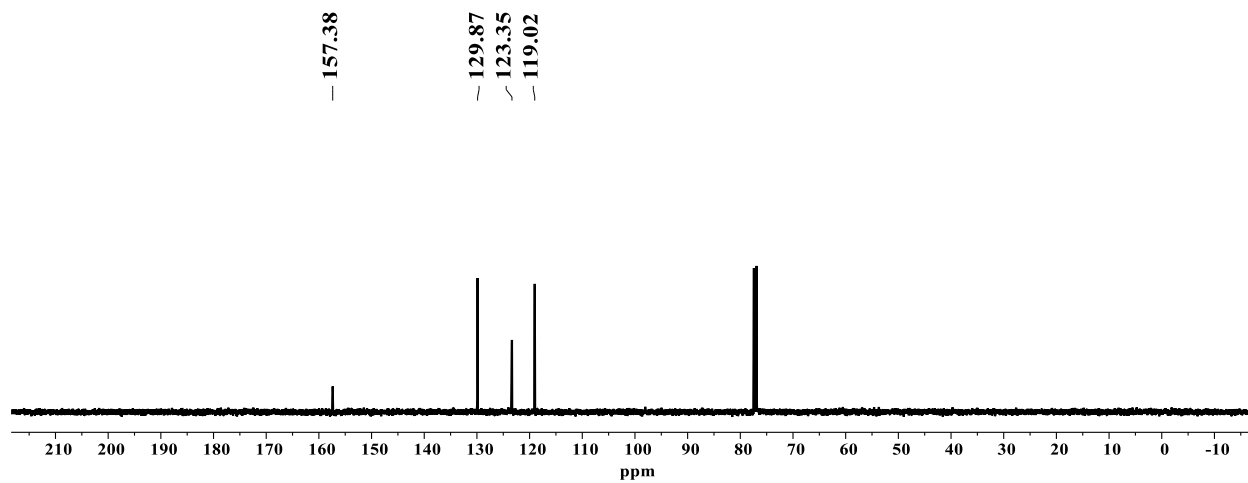

**Fig. S58.**  $^{13}\text{C}\{^1\text{H}\}$  NMR spectrum of **V** in  $\text{CDCl}_3$  (126 MHz).

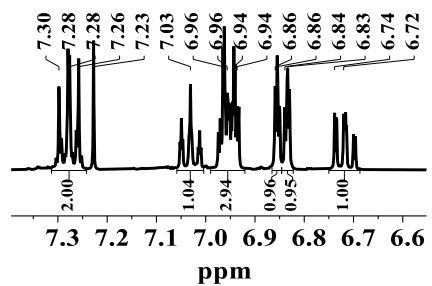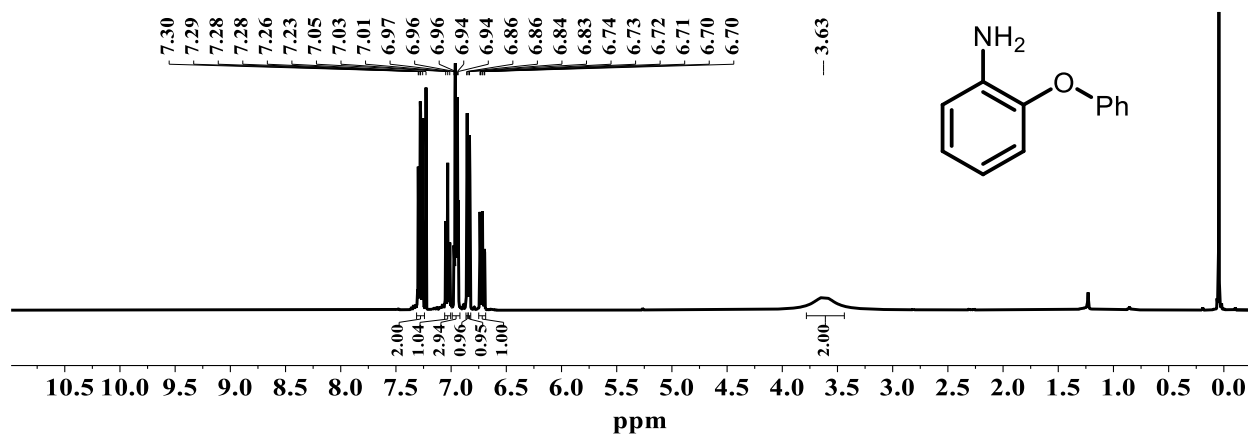

**Fig. S59.**  $^1\text{H}$  NMR spectrum of **VI** in  $\text{CDCl}_3$  (400 MHz).

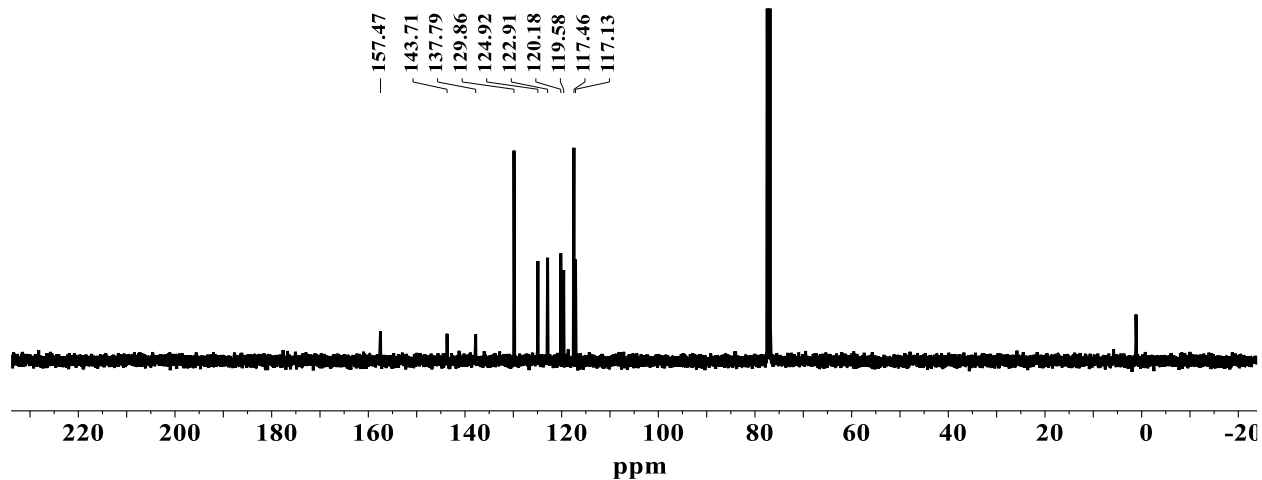

**Fig. S60.**  $^{13}\text{C}\{^1\text{H}\}$  NMR spectrum of **VI** in  $\text{CDCl}_3$  (126 MHz).

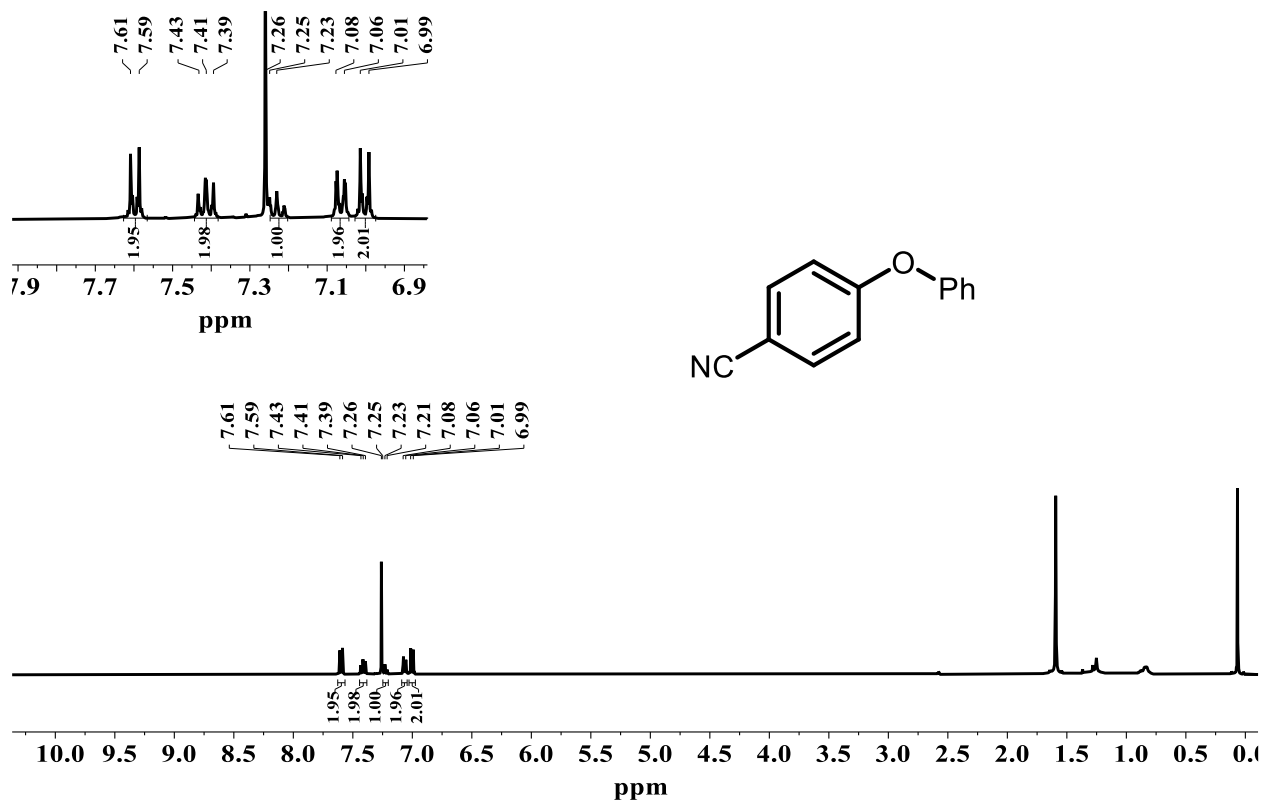

Fig. S61. <sup>1</sup>H NMR spectrum of VII in CDCl<sub>3</sub> (400 MHz).

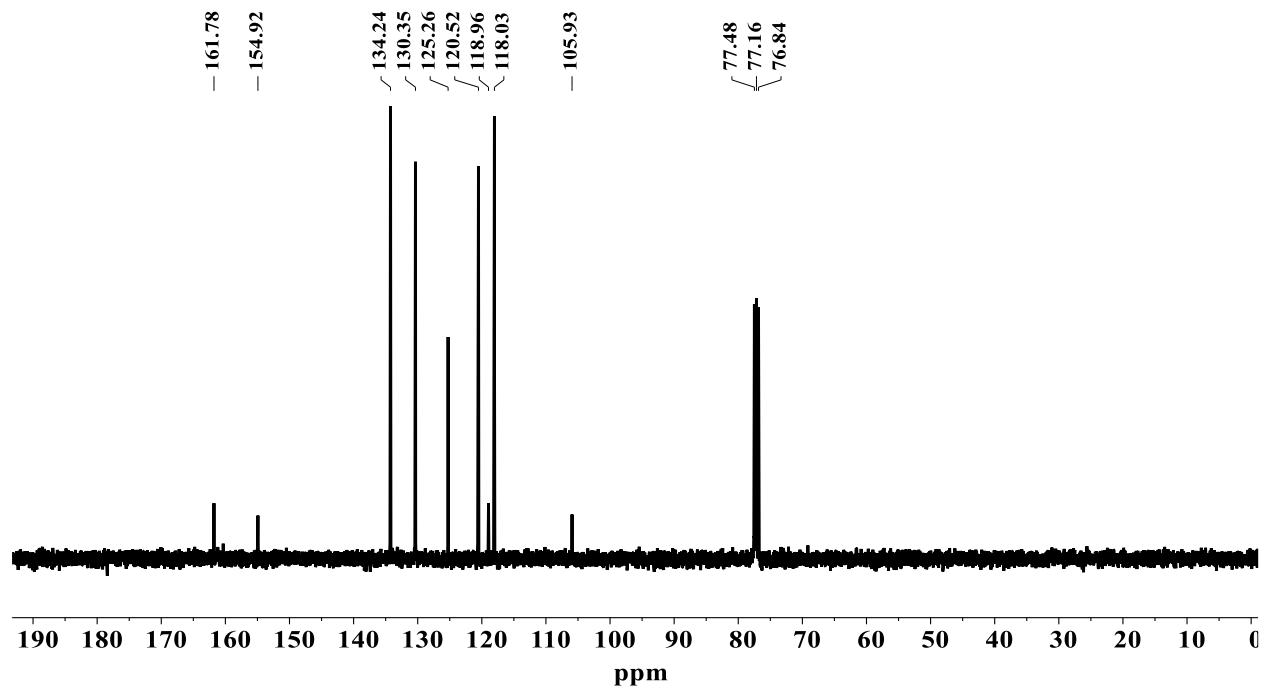

Fig. S62. <sup>13</sup>C{<sup>1</sup>H} NMR spectrum of VII in CDCl<sub>3</sub> (126 MHz).

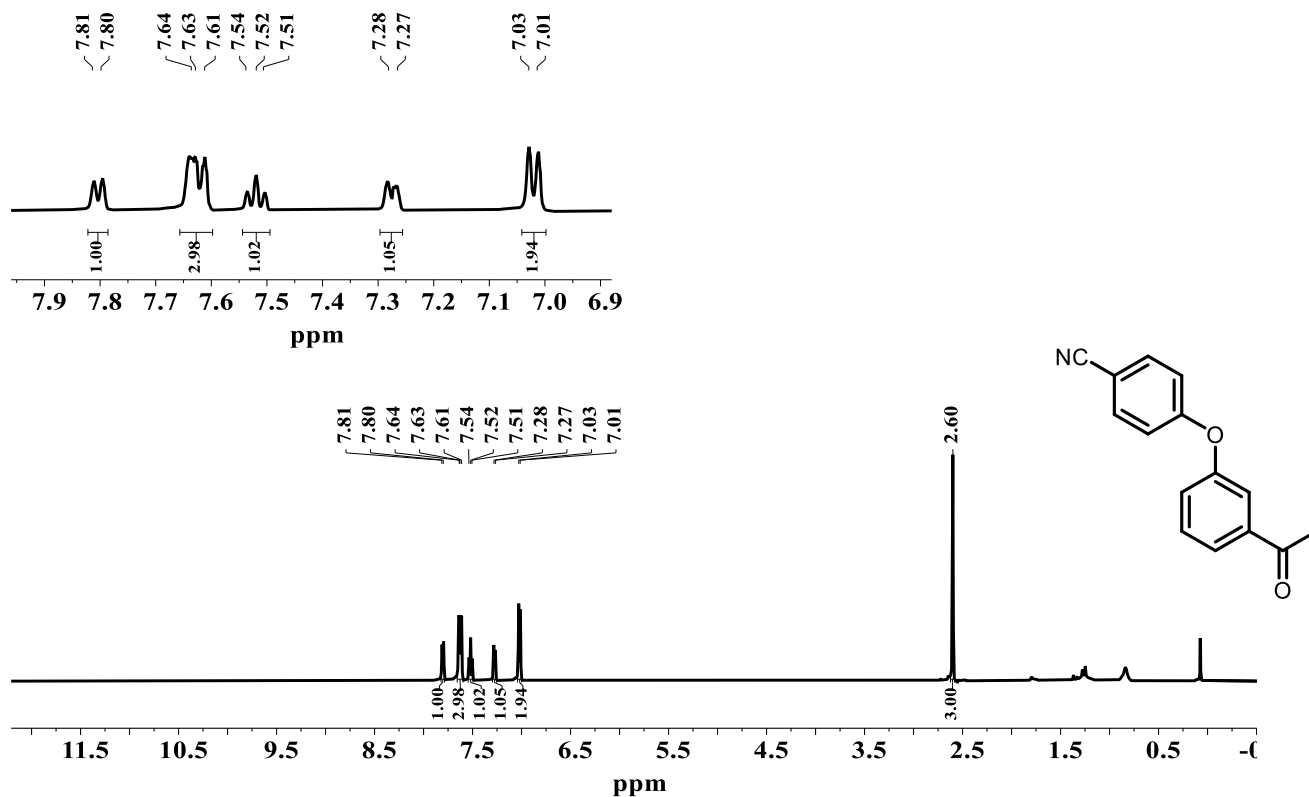

Fig. S63.  $^1\text{H}$  NMR spectrum of VIII in  $\text{CDCl}_3$  (500 MHz).

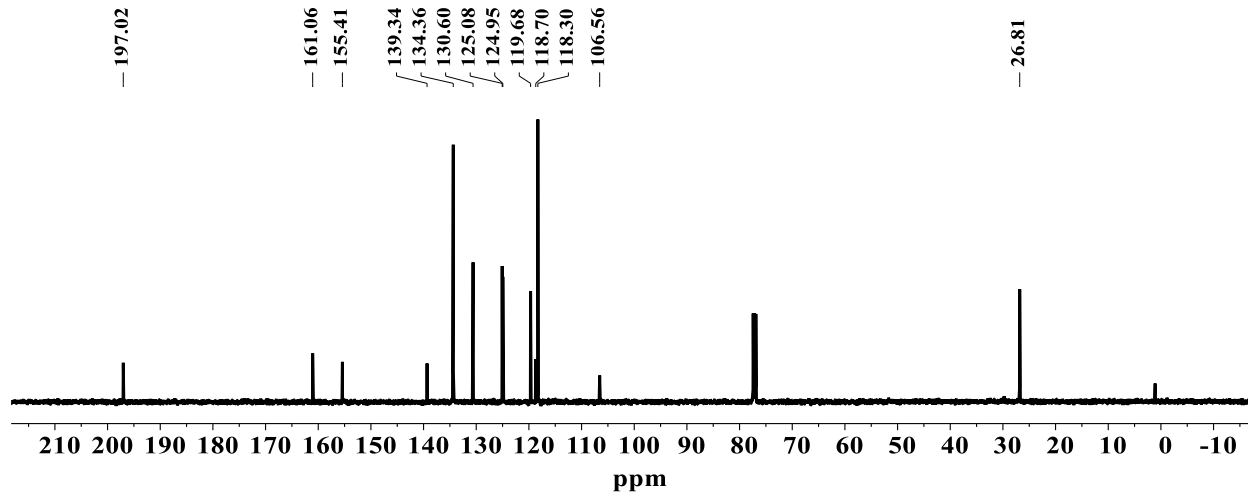

Fig. S64.  $^{13}\text{C}\{^1\text{H}\}$  NMR spectrum of VIII in  $\text{CDCl}_3$  (126 MHz).

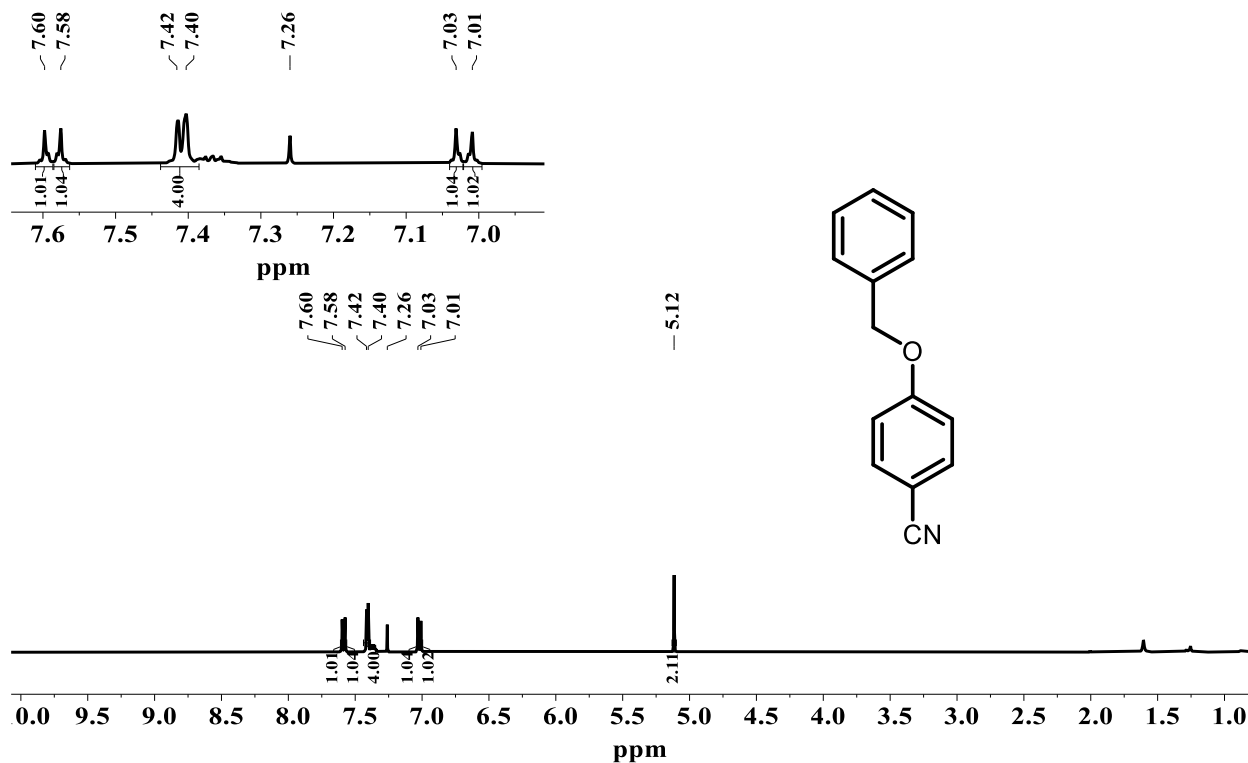

Fig. S65.  $^1\text{H}$  NMR spectrum of IX in  $\text{CDCl}_3$  (400 MHz).

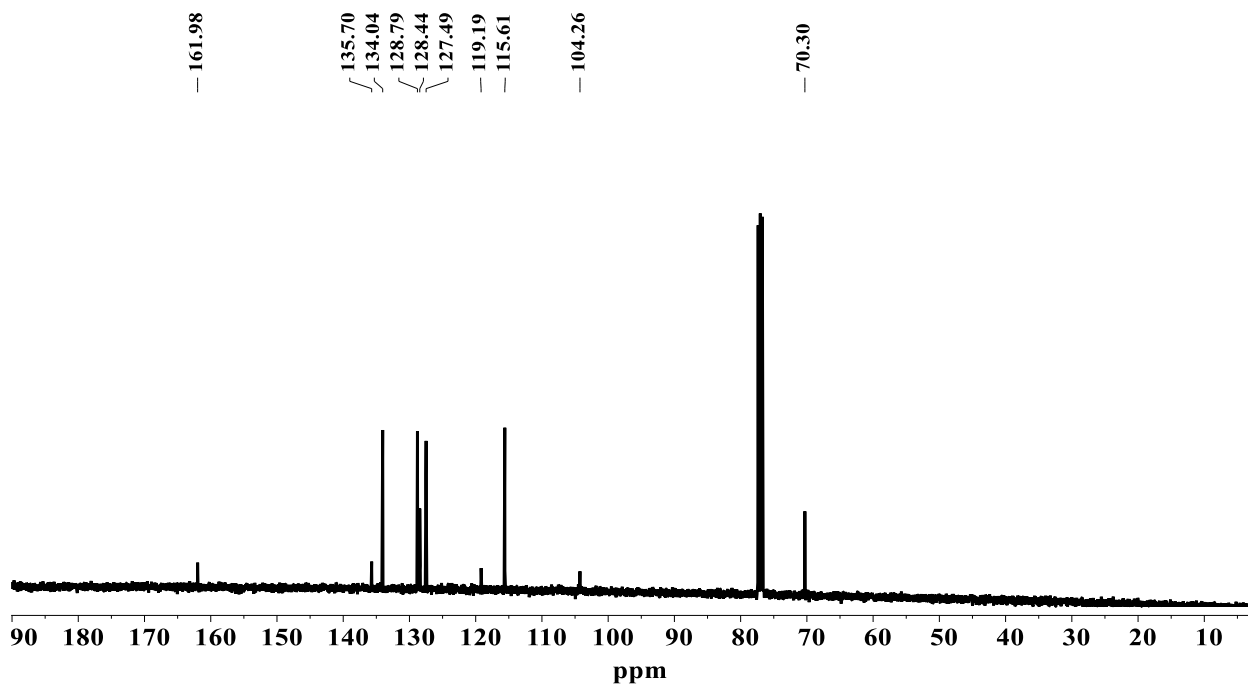

Fig. S66.  $^{13}\text{C}\{^1\text{H}\}$  NMR spectrum of IX in  $\text{CDCl}_3$  (101 MHz).

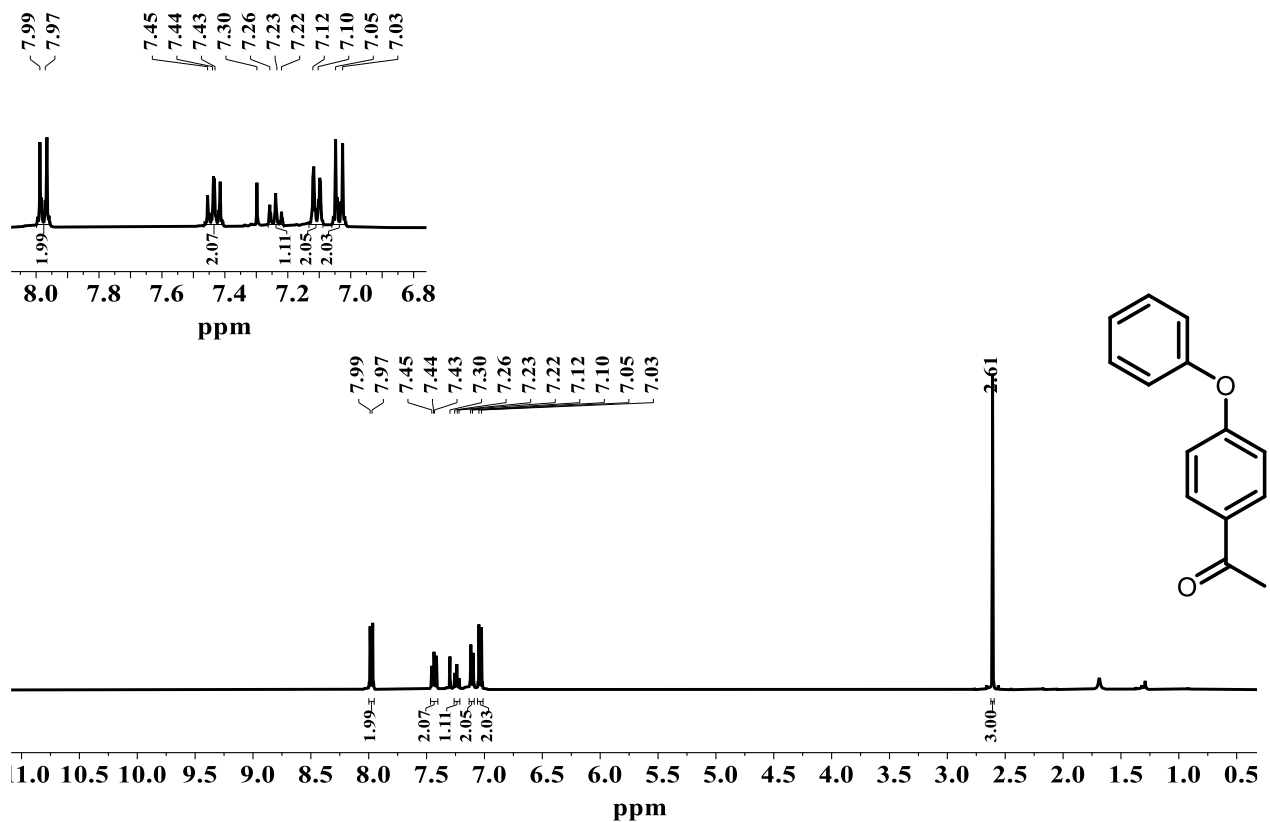

**Fig. S67.**  $^{13}\text{C}\{^1\text{H}\}$  NMR spectrum of **X** in  $\text{CDCl}_3$  (400 MHz).

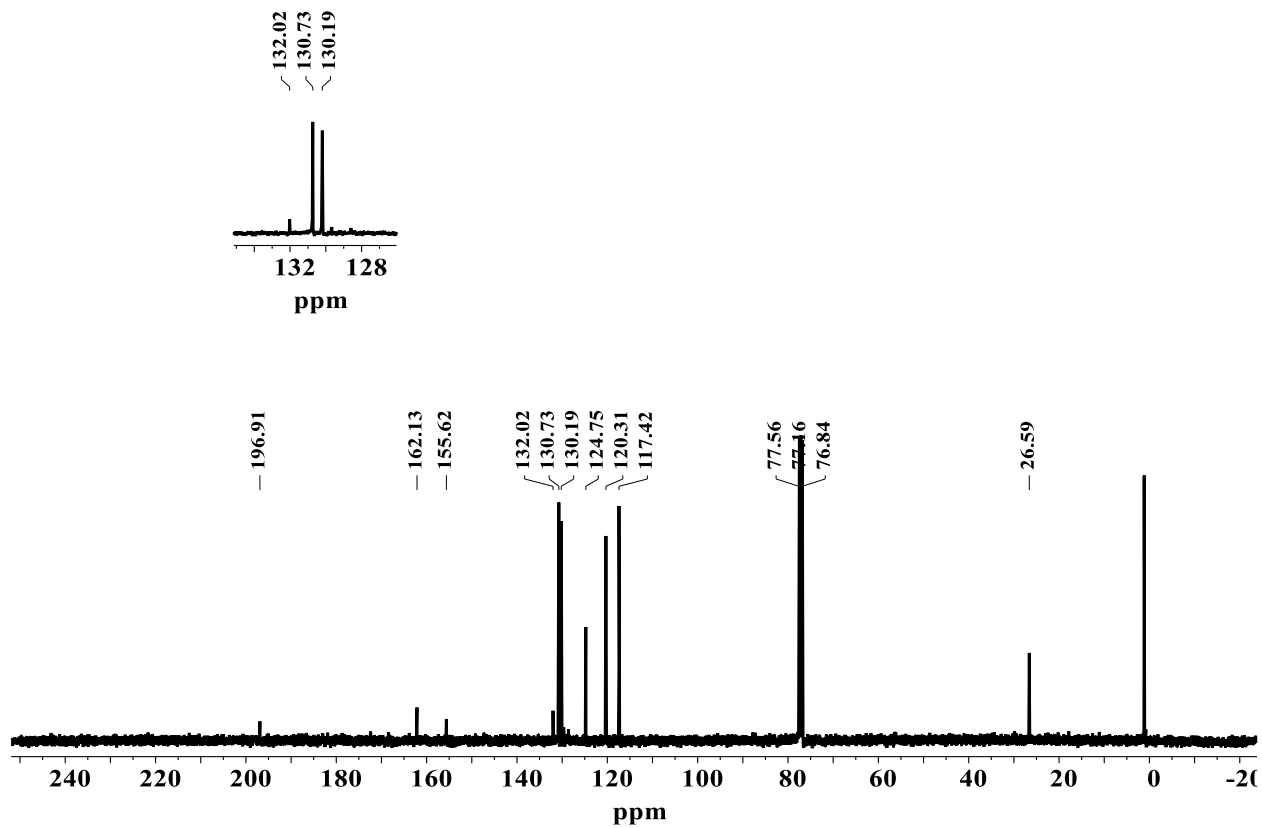



**Fig. S68.**  $^{13}\text{C}\{^1\text{H}\}$  NMR spectrum of **X** in  $\text{CDCl}_3$  (101 MHz).

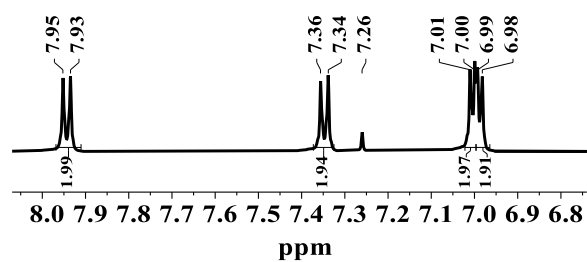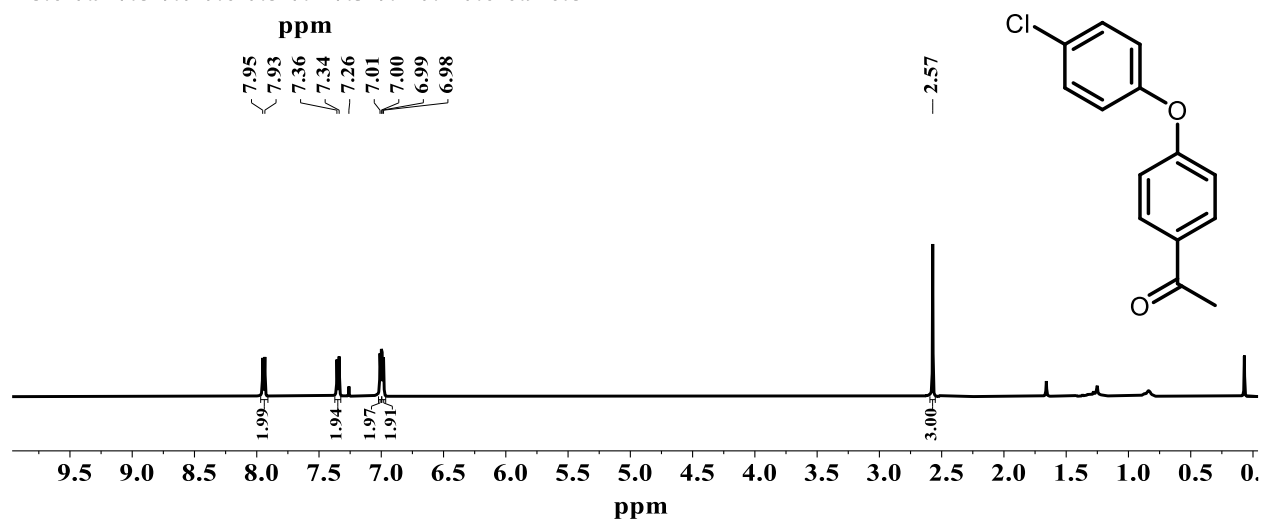

**Fig. S69.**  $^1\text{H}$  NMR spectrum of **XI** in  $\text{CDCl}_3$  (500 MHz).

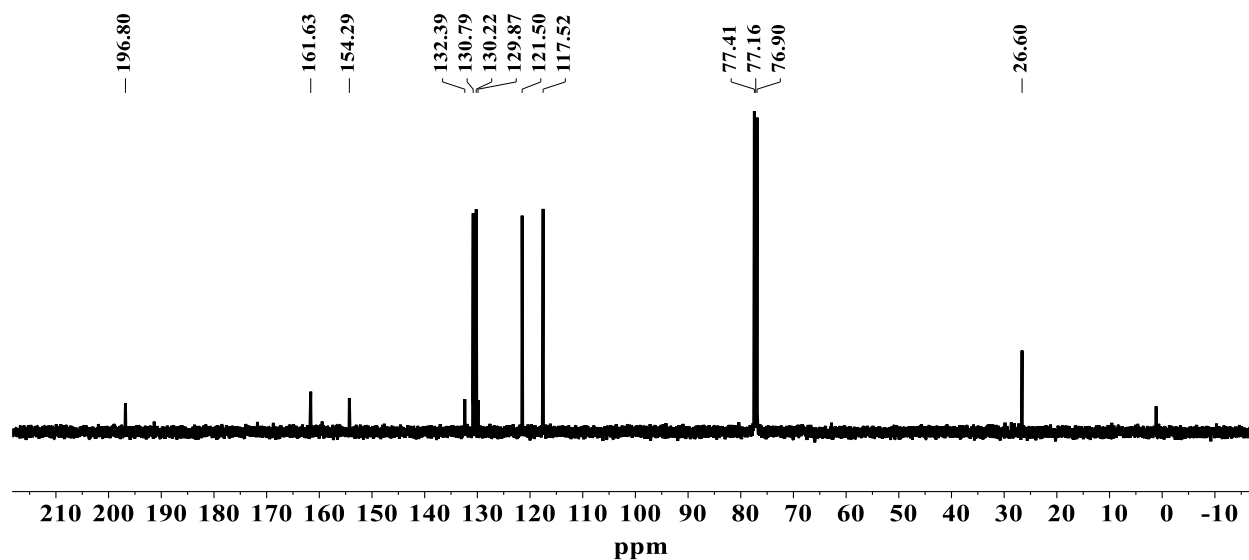

**Fig. S70.**  $^{13}\text{C}\{^1\text{H}\}$  NMR spectrum of **XI** in  $\text{CDCl}_3$  (126 MHz).

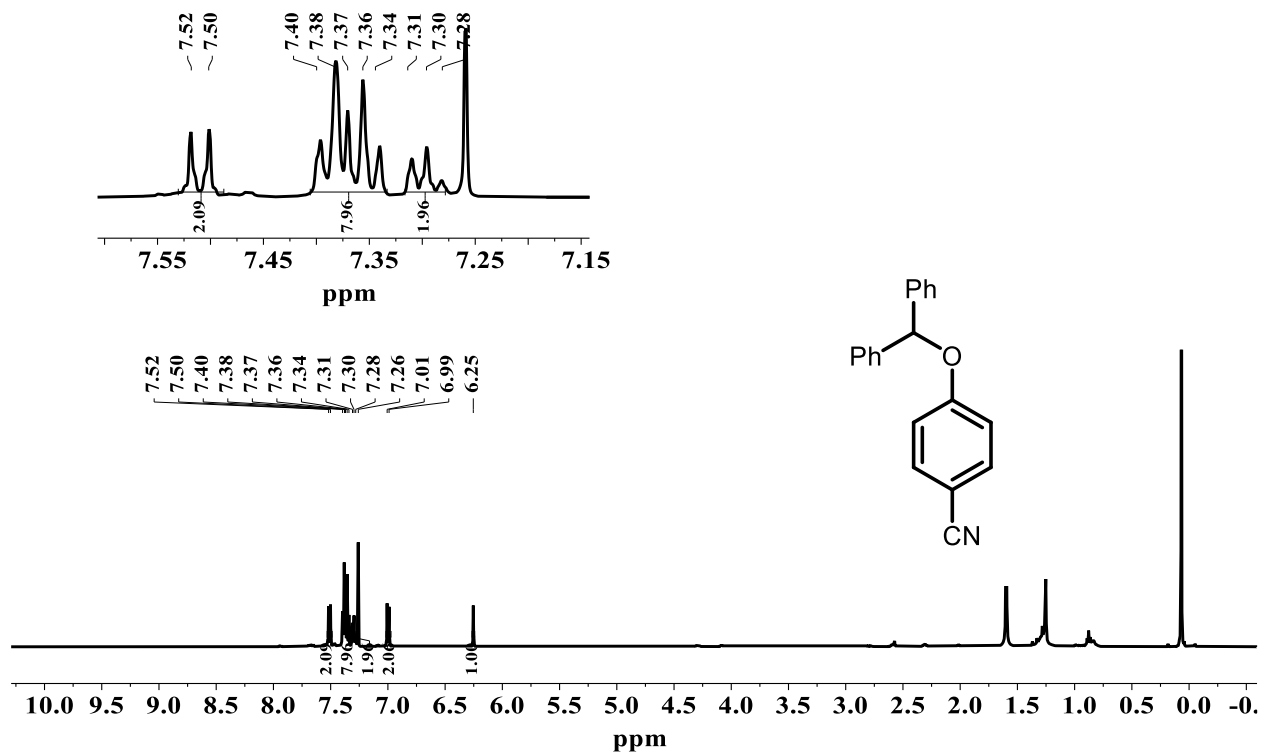

Fig. S71. <sup>1</sup>H NMR spectrum of XII in CDCl<sub>3</sub> (500 MHz).

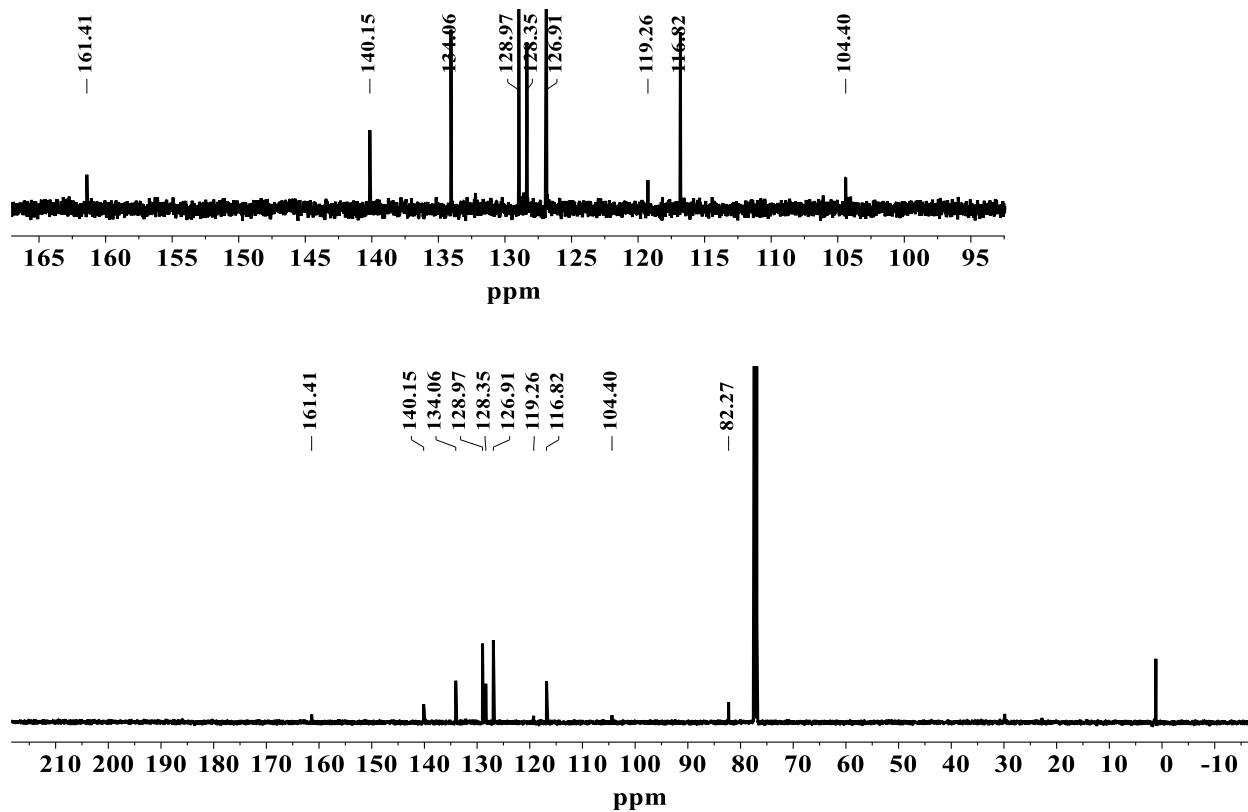

Fig. S72.  $^{13}\text{C}\{^1\text{H}\}$  NMR spectrum of **XII** in  $\text{CDCl}_3$  (126 MHz).

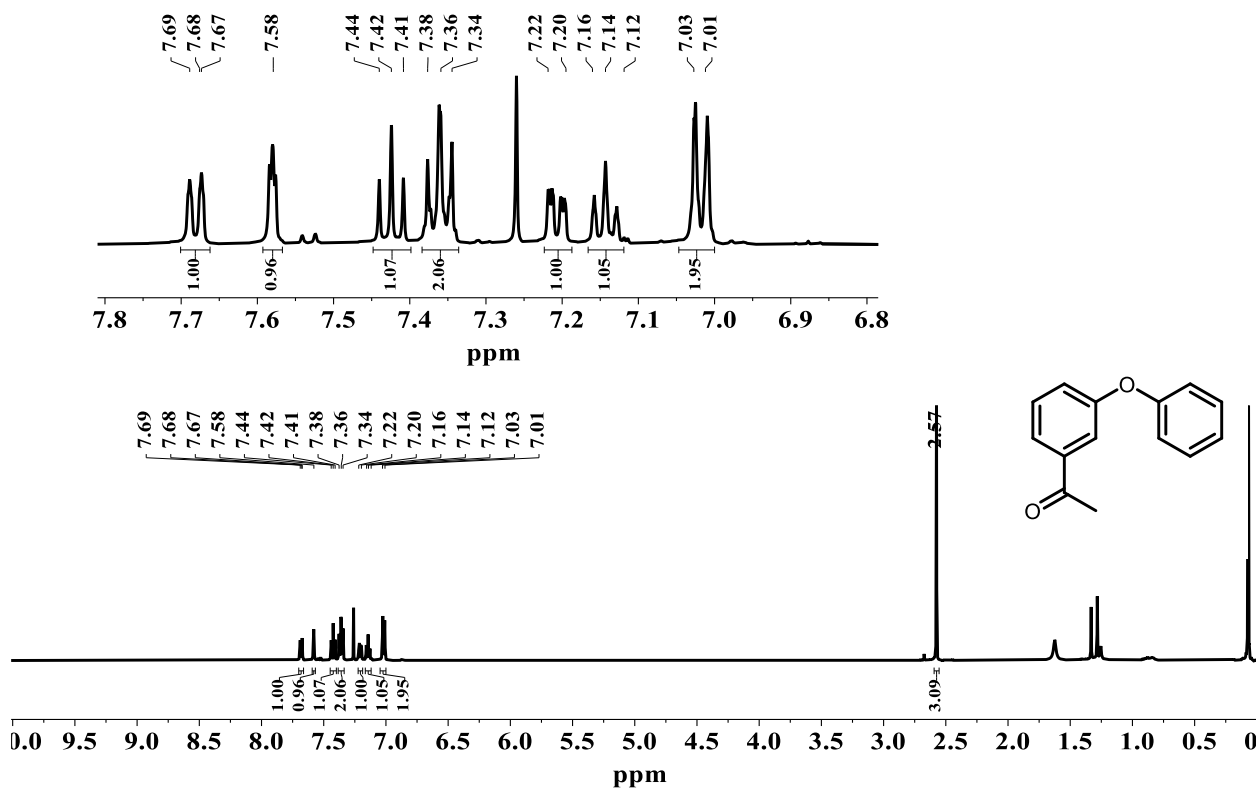

Fig. S73.  $^1\text{H}$  NMR spectrum of **XIII** in  $\text{CDCl}_3$  (500 MHz).

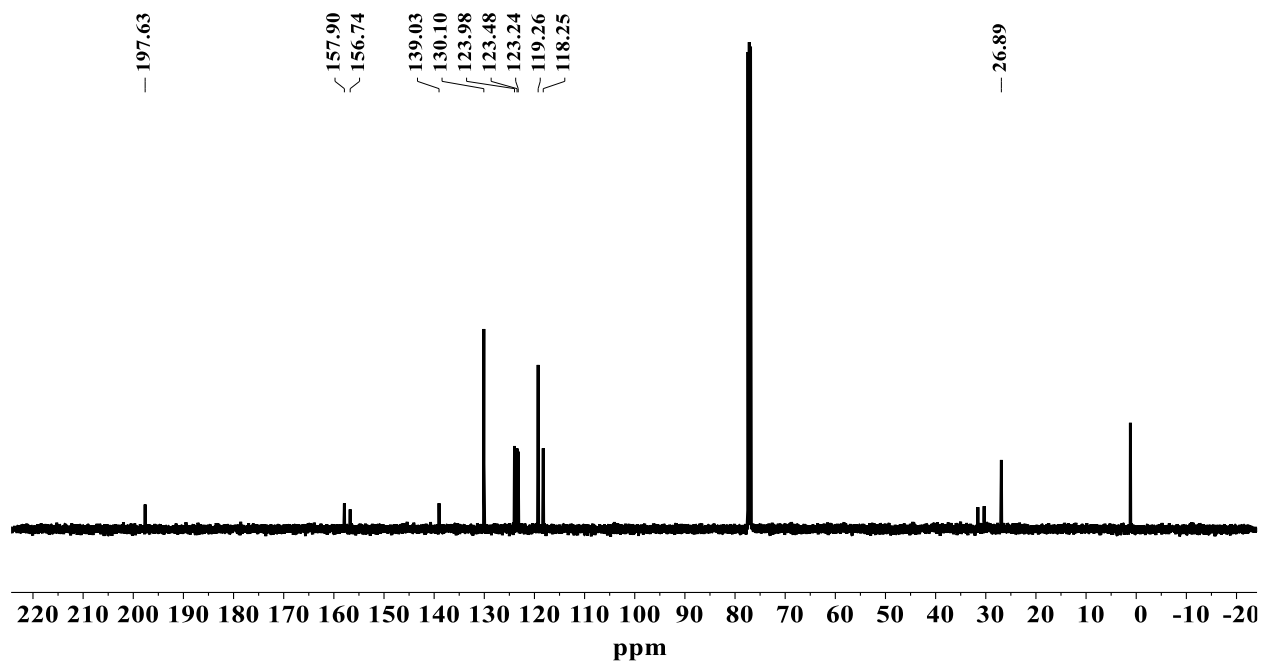

Fig. S74.  $^{13}\text{C}\{^1\text{H}\}$  NMR spectrum of **XIII** in  $\text{CDCl}_3$  (126 MHz).

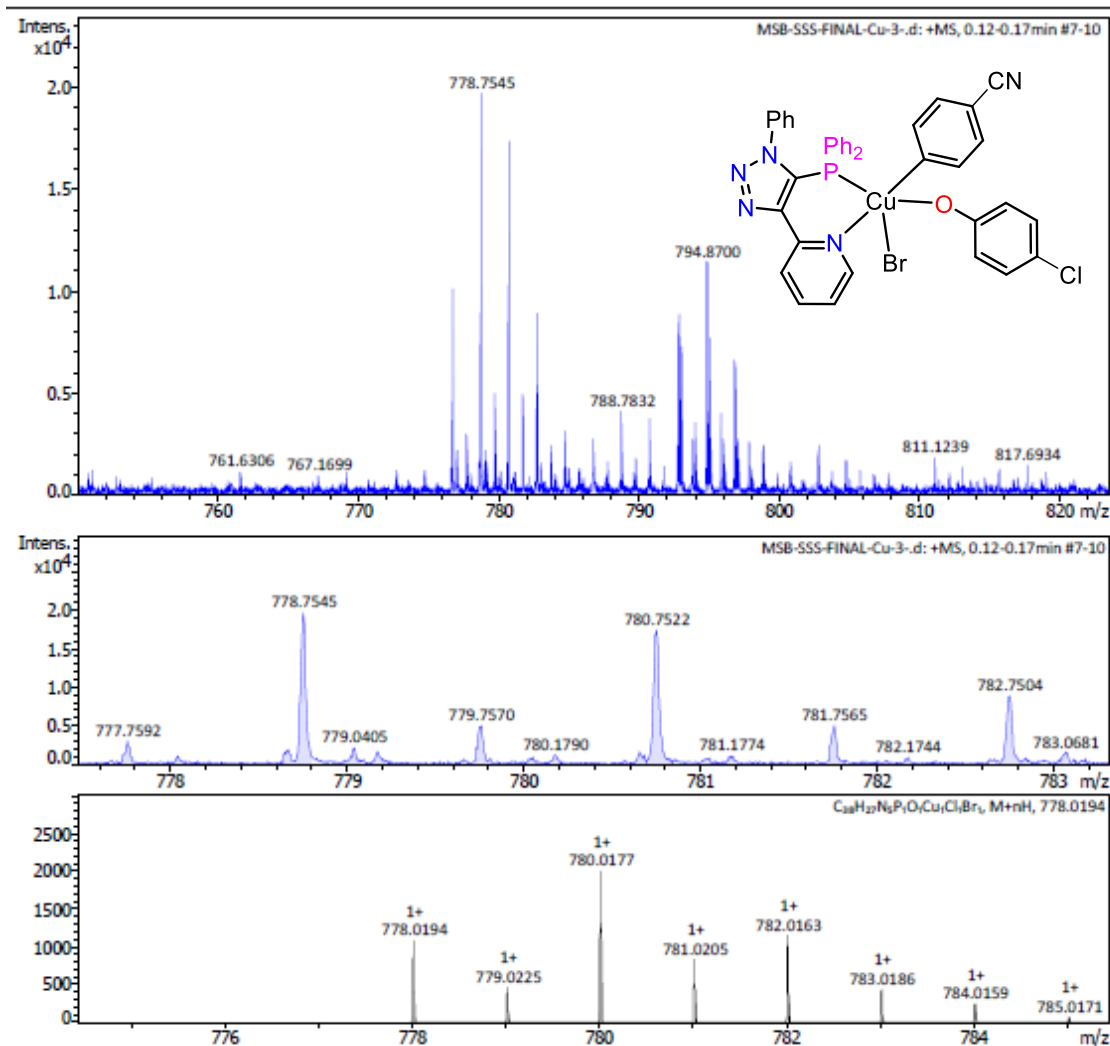

Fig. S75. LRMS corresponding to Cu(III)-intermediate.

## References:

1. Z. Li, C. Brouwer and C. He, *Chem. Rev.*, 2008, **108**, 3239-3265.
2. O. V. Dolomanov, L. J. Bourhis, R. J. Gildea, J. A. K. Howard and H. Puschmann, *J. Appl. Cryst.*, 2009, **42**, 339-341.
3. G. Sheldrick, *Acta Crystallogr., Sect. A: Found. Crystallogr.*, 2015, **71**, 3-8.
4. G. Sheldrick, *Acta Crystallogr., Sect. C: Struct. Chem.*, 2015, **71**, 3-8.
5. M. J. Frisch, G. W. Trucks, H. B. Schlegel, G. E. Scuseria, M. A. Robb, J. R. Cheeseman, G. Scalmani, V. Barone, B. Mennucci, G. A. Petersson, H. Nakatsuji, M. Caricato, X. Li, H. P. Hratchian, A. F. Izmaylov, J. Bloino, G. Zheng, J. L. Sonnenberg, M. Hada, M. Ehara, K. Toyota, R. Fukuda, J. Hasegawa, M. Ishida, T. Nakajima, Y. Honda, O. Kitao, H. Nakai,

- T. Vreven, J. A. Montgomery Jr., J. E. Peralta, F. Ogliaro, M. Bearpark, J. J. Heyd, E. Brothers, K. N. Kudin, V. N. Staroverov, T. Keith, R. Kobayashi, J. Normand, K. Raghavachari, A. Rendell, J. C. Burant, S. S. Iyengar, J. Tomasi, M. Cossi, N. Rega, J. M. Millam, M. Klene, J. E. Knox, J. B. Cross, V. Bakken, C. Adamo, J. Jaramillo, R. Gomperts, R. E. Stratmann, O. Yazyev, A. J. Austin, R. Cammi, C. Pomelli, J. W. Ochterski, R. L. Martin, K. Morokuma, V. G. Zakrzewski, G. A. Voth, P. Salvador, J. J. Dannenberg, S. Dapprich, A. D. Daniels, O. Farkas, J. B. Foresman, J. V. Ortiz, J. Cioslowski and D. J. Fox, *Gaussian 09*, revision D.01, Gaussian, Inc., Wallingford, CT, 2013. .
6. A. E. Reed, L. A. Curtiss and F. Weinhold, *Chem. Rev.*, 1988, **88**, 899-926.
  7. R. Ray and J. F. Hartwig, *Angew. Chem. Int. Ed.*, 2021, **60**, 8203-8211.
  8. C. Sambigiagio, R. H. Munday, S. P. Marsden, A. J. Blacker and P. C. McGowan, *Chem. Eur. J.*, 2014, **20**, 17606-17615.
  9. S. D. Ghodke, A. B. Tamboli, A. V. Diwate, M. B. Gurame, V. P. Ubale, M. D. Joshi and N. N. Maldar, *Journal of Polymer Research*, 2021, **28**, 342.
  10. J. M. Bryan and W. K. George, *Heterocycles* 2015, **90**, 271-297.
  11. C. Zhang, C. Li, J. Bai and H. Li, *Catal Lett*, 2015, **145**, 1764-1770.
  12. P. I. O'Daniel, Z. Peng, H. Pi, S. A. Testero, D. Ding, E. Spink, E. Leemans, M. A. Boudreau, T. Yamaguchi, V. A. Schroeder, W. R. Wolter, L. I. Llarrull, W. Song, E. Lastochkin, M. Kumarasiri, N. T. Antunes, M. Espahbodi, K. Lichtenwalter, M. A. Suckow, S. Vakulenko, S. Mobashery and M. Chang, *J. Am. Chem. Soc.*, 2014, **136**, 3664-3672.
  13. D.-Y. Wang, Z.-K. Yang, C. Wang, A. Zhang and M. Uchiyama, *Angew. Chem. Int. Ed.*, 2018, **57**, 3641-3645.
  14. N. T. S. Phan, T. T. Nguyen, V. T. Nguyen and K. D. Nguyen, *ChemCatChem*, 2013, **5**, 2374-2381.
  15. Y. T. Han, K. Kim, G.-I. Choi, H. An, D. Son, H. Kim, H.-J. Ha, J.-H. Son, S.-J. Chung, H.-J. Park, J. Lee and Y.-G. Suh, *Eur. J. Med. Chem.*, 2014, **79**, 128-142.
  16. R. A. McClelland, V. M. Kanagasabapathy, N. S. Banait and S. Steenken, *J. Am. Chem. Soc.*, 1989, **111**, 3966-3972.
